# Supplementary material for: Negative feedback control of neuronal activity by microglia
Source: Springer Nature journal article supplement (doi:10.1038/s41586-020-2777-8), 2020-09-30
Supplement: MOESM9 [file 41586_2020_2777_MOESM9_ESM.xlsx]

## Sheet: 2b
Percentage of cells (identified by in situ) positive for Csf1 or Il34 in grey matter and white matter
	Average percentage of positive cells in white matter					Average percentage of positive cells in gray matter
Csf1	76.409	92.8157				23.591	7.18426
IL34	8.82353	5.7807	7.6829	1.8868		91.1765	94.2193	92.3171	98.1132

## Sheet: 2c
Average microglia density per frame (.5mm x .5mm)
Grey Matter		White Matter
IL34 fl/fl	IL34 fl/fl Nestin Cre+	IL34 fl/fl	IL34 fl/fl Nestin Cre+
8	1.54546	5.6	5.36364
5.88889	1.18182	4	4.18182
5	1.2	2.83333	3.4
7.42857		3.57143

## Sheet: 2e
Average microglia density per frame (.5mm x .5mm)
Grey Matter		White Matter
Csf1 fl/fl	Csf1 fl/fl Nestin Cre+	Csf1 fl/fl	Csf1 fl/fl Nestin Cre+
6.375	7.33333	4.625	1.66667
7.8	6.83333	5.2	1
10		5.75
6		6.16667

## Sheet: 2g
2g	Percentage of mice with seizures in response to D1 agonist
		Il34 fl/fl	Il34 fl/fl Nestin Cre/+
	seizure	2	8
	no seizure	13	2
	Total	15	10

## Sheet: 2h
2h	Percentage of mice with seizures in response to D1 agonist
		Csf1 fl/fl	Csf1 fl/fl Nestin Cre/+
	seizure	3	3
	no seizure	8	7
	Total	11	10

## Sheet: 2i
Average microglia counts per frame per mouse (.35mm x .35mm)					Extrapolated to microglia per 1mm^2
Cortex					Cortex
IL34 fl/fl	IL34 fl/fl Drd1a cre+	IL34 fl/fl D2 cre+			IL34 fl/fl	IL34 fl/fl Drd1a cre+	IL34 fl/fl D2 cre+
10.2	9.25	13			83.2626	75.5078	106.119
12.25	12.2	12.6667			99.9968	99.5886	103.398
12.3333	13	12.3333			100.677	106.119	100.677
13.6667	11.3333				111.561	92.514
11.6667					95.235
13.3333					108.84
13.3333					108.84
Striatum					Striatum
IL34 fl/fl	IL34 fl/fl Drd1a cre+	IL34 fl/fl D2 cre+			IL34 fl/fl	IL34 fl/fl Drd1a cre+	IL34 fl/fl D2 cre+
7.6	4.66667	6.66667			62.0388	38.094	54.42
10	4.66667	7			81.63	38.094	57.141
11.6667	5.66667	7			95.235	46.257	57.141
11.5	5				93.8745	40.815
10					81.63
11					89.793
10.6667					87.072
Cerebellum					Cerebellum
IL34 fl/fl	IL34 fl/fl Drd1a cre+	IL34 fl/fl D2 cre+			IL34 fl/fl	IL34 fl/fl Drd1a cre+	IL34 fl/fl D2 cre+
3.66667	2.33333	3.66667			29.931	19.047	29.931
3	3.33333	3.33333			24.489	27.21	27.21
3.66667	3	4			29.931	24.489	32.652
3.66667					29.931
3.66667					29.931
2.66667					21.768

## Sheet: 2j
2j	Percentage of mice with seizures in response to D1 agonist
		Il34fl/fl	Il34fl/fl Drd1a Cre/+	Il34fl/fl Drd2 Cre/+
	seizure	2	8	7
	no seizure	10	2	1
	Total	12	10	8

## Sheet: 2k
2k	Percentage of mice with seizures in response to Kainic acid
		Il34fl/fl	Il34fl/fl Drd1a Cre/+	Il34fl/fl Drd2 Cre/+
	seizure	6	3	1
	no seizure	11	6	8
	Total	17	9	9
