# Supplementary material for: Negative feedback control of neuronal activity by microglia
Source: Springer Nature journal article supplement (doi:10.1038/s41586-020-2777-8), 2020-09-30
Supplement: MOESM13 [file 41586_2020_2777_MOESM13_ESM.xlsx]

## Sheet: ed2a
Average microglia counts per frame per mouse (.35mm x .35mm)						Extrapolated to microglia per 1mm^2
Cortex						Cortex
Control	Microglia Deficient					Control	Microglia Deficient
12.3333	0.333333					100.677	2.721
12	2.33333					97.956	19.047
11	1.66667					89.793	13.605
	0.5						4.0815
Striatum						Striatum
Control	Microglia Deficient					Control	Microglia Deficient
10.6667	0.333333					87.072	2.721
10.3333	3					84.351	24.489
9.66667	3					78.909	24.489
	0						0
Cerebellum						Cerebellum
Control	Microglia Deficient					Control	Microglia Deficient
3	0					24.489	0
4	0.666667					32.652	5.442
3.5	0					28.5705	0
	0						0
Hippocampus						Hippocampus
DG						DG
Control	Microglia Deficient					Control	Microglia Deficient
8.5	0.5					69.3855	4.0815
9	2.5					73.467	20.4075
9.5	0.5					77.5485	4.0815
	0						0
CA3						CA3
Control	Microglia Deficient					Control	Microglia Deficient
10.5	0.5					85.7115	4.0815
8.5	2					69.3855	16.326
10	0.5					81.63	4.0815
	1						8.163
CA1						CA1
Control	Microglia Deficient					Control	Microglia Deficient
9.5	0.5					77.5485	4.0815
10	2.5					81.63	20.4075
9.5	0.5					77.5485	4.0815
	0						0

## Sheet: ed2b
Ratio of time spent in the open arms:closed arms
Control	Microglia Deficient
0	0.000332223
0.829979	0.179288
0.156649	0.126394
0.0671139	0.139011
0.0669581	0.0856319
0.0527558	0.00761146
0	0.516363
0.256965	0.0414991
0.117812	0.121382
0.0962637	0.000811426

## Sheet: ed2c
Latency to fall (sec) on the accelerating rotarod
Trial	Control							Microglia Deficient
	MOUSE 1	MOUSE 2	MOUSE 3	MOUSE 4	MOUSE 5	MOUSE 6	MOUSE 7	MOUSE 1	MOUSE 2	MOUSE 3	MOUSE 4	MOUSE 5	MOUSE 6	MOUSE 7	MOUSE 8	MOUSE 9	MOUSE 10	MOUSE 11	MOUSE 12
1	300	300	251	217	284	300	277	229	251	266	293	259	242	248	229	227	294	255	298
2	279	300	294	300	300	300	281	282	266	300	300	244	111	273	226	281	300	300	261
3	276	287	202	291	300	300	288	157	247	300	300	112	295	300	243	266	300	300	275
4	262	290	210	238	253	300	258	250	300	242	245	245	233	271	232	232	275	277	229
5	300	300	300	300	300	300	221	116	300	300	300	181	290	241	275	289	300	244	281
6	300	298	172	300	300	300	300	155	300	300	300	300	300	287	284	272	290	300	300
7	220	160	181	300	300	300	287	226	262	240	300	218	79	300	283	247	244	226	270
8	283	249	211	300	300	300	300	126	284	300	300	275	272	300	276	300	300	265	275
9	281	249	248	231	300	300	300	91	300	300	300	300	300	300	286	300	300	203	300

## Sheet: ed2d
Latency to find hidden food (s)
Control	Microglia Deficient
120	296
74	125
176	228
60	52
149	64
127	65
167	416
100	81
356	269
510	75
290	138
355	46
280	50
242
57
300
147
284
197
524
239

## Sheet: ed2e
Control mice, social preference				Control mice, social memory
Time spent sniffing object or mouse (s)				Time spent sniffing familiar mouse or novel mouse (s)
Object	Mouse			Familiar Mouse	Novel Mouse
28.1615	77.6109			27.1605	55.7224
18.6854	122.923			42.6426	98.0314
28.1615	134.535			59.1258	158.091
29.9633	78.8789			18.6186	47.2472
27.9613	95.0951			23.4902	133.734
16.4164	127.261			26.8268	114.915
19.9533	93.8939			57.8579	102.703
Microglia deficient mice, social preference				Microglia deficient mice, social memory
Time spent sniffing object or mouse (s)				Time spent sniffing familiar mouse or novel mouse (s)
Object	Mouse			Familiar Mouse	Novel Mouse
17.2172	131.198			38.6386	129.329
44.9783	135.202			23.6904	177.444
39.306	141.341			58.5252	137.804
70.6707	171.104			49.1158	82.8829
40.7741	102.035			40.7741	105.506
44.9116	162.162			48.7821	141.808
32.0988	138.338			15.6823	89.2893

## Sheet: ed2g
Number of seizures in response to kainic acid
Control	Microglia deficient
0	4
4	1
0	5
0	0
0	2
0	7
0	6
0	5
0	7
	5

## Sheet: ed2h
Distance Traveled (in cm) in response to D1 agonist (SKF81297, 3mg/kg)
Control	Microglia Deficient
6100.06	14176.6
3628.89	8734.87
6146.18	8323.57
11513.7	15392.4
6329.62	4580.1
6319.88	6999.25
5935.79	13977.4
7087.14	14191.3
9131.64
8795.58
11366.3
8302.02
5731.17
9265.3
