# Supplementary material for: Negative feedback control of neuronal activity by microglia
Source: Springer Nature journal article supplement (doi:10.1038/s41586-020-2777-8), 2020-09-30
Supplement: MOESM16 [file 41586_2020_2777_MOESM16_ESM.xlsx]

## Sheet: ED5a
Average number of D1 neurons (GFP+ neurons/DARPP32+ cells)						Average number of D2 neurons (GFP- neurons/DARPP32+ cells)
Il34 fl/fl Drd1a eGFP L10a	Il34 fl/fl Drd1a Cre+ Drd1a eGFP L10a					Il34 fl/fl Drd1a eGFP L10a	Il34 fl/fl Drd1a Cre+ Drd1a eGFP L10a
66.7159	64.6388					33.2841	35.3612
60.6121	57.4613					39.3879	42.5387

## Sheet: ED5b
Number of Primary Dendrites in D1 neurons (GFP+ cells)						Number of Primary Dendrites in D2 neurons (GFP- cells)
Il34 fl/fl Drd1a eGFP L10a		primary dendrites				Il34 fl/fl Drd1a eGFP L10a		primary dendrites
control	160410 cell 1	6				control	170203 cell 1	3
control	160410 cell 2	N/A				control	170203 cell 2	4
control	160411 cell 1	7				control	170131 cell 1	4
control	160411 cell 2	8				control	170131 cell 2	5
control	160920 cell 1	6				control	170201 cell 1	4
control	160920 cell 2	5				control	170201 cell 2	5
control	160921 cell 1	6				control	170130 cell 1	5
control	160921 cell 2	6				control	170130 cell 2	6
control	160928 cell 1	6				control	170129 cell 1	4
control	160928 cell 2	6				control	170129 cell 2	4
control	160928 cell 3	6				control	170128 cell 1	6
control	160929	3				control	170128 cell 2	N/A
						control	170127 cell 1	4
						control	170127 cell 2	5
						control	170125 cell 1	5
						control	170125 cell 2	4
Il34 fl/fl Drd1a Cre+ Drd1a eGFP L10a						Il34 fl/fl Drd1a Cre+ Drd1a eGFP L10a
mutant	160409 cell 1	6				mutant	170126 cell 1	4
mutant	160409 cell 2	5				mutant	170126 cell 2	5
mutant	160412 cell 1	3				mutant	170124 cell 1	4
mutant	160412 cell 2	8				mutant	170124 cell 2	4
mutant	160412 cell 3	5				mutant	170205 cell 1	9
mutant	160915 cell 1	7				mutant	170205 cell 2	5
mutant	160915 cell 2	6				mutant	170205 cell 3	4
mutant	160916 cell 1	5				mutant	170205 cell 4	4
mutant	160916 cell 2	7				mutant	170202 cell 1	6
mutant	160914 cell 1	4				mutant	170202 cell 2	4
mutant	160914 cell 2	5
mutant	1609222 cell 1	4
mutant	160922 cell 2	6
mutant	160930 cell 1	6
mutant	160930 cell 2	4

## Sheet: ED5c
Dendritic Length of D1 Neurons (GFP+)						Sholl Analysis of D1 neurons
			total dendirtic length				F	F	M	M	m	m	m	m	f	f	f	f
F	control	160410 cell 1	1576.9				control	control	control	control	control	control	control	control	control	control	control	control
F	control	160410 cell 2	N/A				160410 cell 1	160410 cell 2	160411 cell 1	160411 cell 2	160920 cell 1	160920 cell 2	160921 cell 1	160921 cell 2	160928 cell 1	160928 cell 2	160928 cell 3	160929
M	control	160411 cell 1	2570.2			10	1	no good	1	1	1	0	1	0	1	2	3	1
M	control	160411 cell 2	2400.7			20	5		9	6	8	9	7	3	6	7	10	7
m	control	160920 cell 1	1921.5			30	7		16	14	12	10	8	6	11	12	20	9
m	control	160920 cell 2	2207			40	14		20	20	14	14	10	7	16	18	23	15
m	control	160921 cell 1	1585.5			50	15		23	24	16	16	11	16	16	20	23	19
m	control	160921 cell 2	1599			60	16		23	23	18	17	12	13	19	20	25	19
f	control	160928 cell 1	2050			70	14		23	20	16	15	11	12	21	20	21	18
f	control	160928 cell 2	2189.2			80	13		22	20	15	15	11	11	17	17	17	15
f	control	160928 cell 3	2465			90	11		21	18	14	13	10	10	16	15	15	13
f	control	160929	1936.7			100	11		14	12	12	10	9	10	11	12	11	9
						110	5		10	10	8	7	9	7	9	9	8	6
						120	1		4	6	5	7	9	4	5	7	5	4
F	mutant	160409 cell 1	2381.1			130	0		3	4	1	6	8	4	1	1	1	4
F	mutant	160409 cell 2	1639.3			140			0	3	1	2	6	3	0	0	0	3
M	mutant	160412 cell 1	2278.6			150				2	0	1	5	1				1
M	mutant	160412 cell 2	3147.2			160				1		0	2	1				0
M	mutant	160412 cell 3	1936			170				0			1	0
m	mutant	160915 cell 1	3586.8			180							0
m	mutant	160915 cell 2	2999.9
m	mutant	160916 cell 1	2541.6
m	mutant	160916 cell 2	1374.3
m	mutant	160914 cell 1	1152.7
m	mutant	160914 cell 2	2505.3
f	mutant	1609222 cell 1	1788.3
f	mutant	160922 cell 2	2212.2				F	F	M	M	M	m	m	m	m	m	m	f	f	f	f
f	mutant	160930 cell 1	1044.8				mutant	mutant	mutant	mutant	mutant	mutant	mutant	mutant	mutant	mutant	mutant	mutant	mutant	mutant	mutant
f	mutant	160930 cell 2	875				160409 cell 1	160409 cell 2	160412 cell 1	160412 cell 2	160412 cell 3	160915 cell 1	160915 cell 2	160916 cell 1	160916 cell 2	160914 cell 1	160914 cell 2	160922 cell 1	160922 cell 2	160930 cell 1	160930 cell 2
						10	2	3	2	2	2	5	1	4	2	2	0	1	2	3	1
						20	12	8	9	12	9	17	6	7	8	5	8	6	7	5	5
						30	14	12	14	19	10	25	14	12	11	7	15	10	13	10	5
						40	18	14	19	21	12	27	21	16	12	7	21	13	13	11	6
						50	19	15	21	23	13	30	26	20	11	8	24	14	15	11	6
						60	21	15	20	27	15	31	26	21	11	7	24	15	14	10	6
						70	19	13	22	27	15	31	31	24	11	7	24	16	15	8	6
						80	18	11	17	26	13	30	29	23	11	8	23	15	15	7	6
						90	16	10	17	21	11	27	27	20	11	9	19	13	15	7	6
						100	12	7	14	20	11	22	20	17	9	9	12	12	14	5	6
						110	9	6	9	17	10	14	14	12	6	7	12	9	11	4	4
						120	9	5	5	13	10	8	6	5	4	6	8	6	10	2	3
						130	7	2	3	9	10	5	3	3	2	3	3	5	9	0	3
						140	6	1	1	6	7	3	0	3	0	2	1	3	8		1
						150	3	1	0	4	6	1		0		1	0	1	4		1
						160	1	0		3	5	0				0		0	1		0
						170	1			1	2								0
						180	0			0	0
Dendritic Length of D2 neurons (GFP+)						Sholl Analysis of D2 neurons (GFP-)
		total dendirtic length					f	f	m	m	m	m	m	m	f	f	f	f	m	m	f	f
control	170203 cell 1	1809.3					control	control	control	control	control	control	control	control	control	control	control	control	control	control	control	control
control	170203 cell 2	1934.1				radius	170125 cell 1	170125 cell 2	170127 cell 1	170127 cell 2	170128 cell 1	170128 cel 2	170129 cell 1	170129 cell 2	170130 cell 1	170130 cell 2	170201 cell 1	170201 cell 2	170203 cell 1	170203 cell 2	170131 cell 1	170131 cell 2
control	170131 cell 1	1833.3				10	2	0	1	4	4	no good	4	1	2	3	1	4	1	2	3	5
control	170131 cell 2	1604.3				20	6	5	7	9	9		6	3	9	14	6	8	6	7	10	7
control	170201 cell 1	1683.5				30	10	5	12	13	14		7	9	13	22	11	12	10	14	16	9
control	170201 cell 2	1700.5				40	14	10	14	13	21		10	14	13	26	14	15	13	18	17	15
control	170130 cell 1	1539.5				50	15	13	13	12	20		10	18	14	24	14	16	17	20	22	15
control	170130 cell 2	2435.1				60	15	11	12	13	20		11	15	14	23	15	14	17	21	19	15
control	170129 cell 1	1117.5				70	15	10	13	12	19		11	14	14	23	15	14	16	18	15	14
control	170129 cell 2	1594.1				80	15	8	12	10	15		8	12	12	22	15	11	14	17	13	12
control	170128 cell 1	1855.2				90	18	6	9	9	11		6	11	8	15	13	12	12	16	9	8
control	170128 cell 2	N/A				100	13	4	7	8	6		3	8	6	6	13	10	10	6	7	6
control	170127 cell 1	1442.6				110	7	4	3	5	2		2	5	5	6	9	5	9	3	2	5
control	170127 cell 2	1509.7				120	2	2	2	2	1		2	3	2	2	3	2	3	0	1	4
control	170125 cell 1	1723.9				130	1	1	1	2	1		1	0	1	0	2	0	1		1	2
control	170125 cell 2	1130.9				140	0	0	0	0	0		1		1		0		0		0	2
						150							1		1							1
						160							0		1							1
						170									1							0
mutant	170126 cell 1	2412.7				180									0
mutant	170126 cell 2	1231.9
mutant	170124 cell 1	1072.9
mutant	170124 cell 2	1277.4
mutant	170205 cell 1	1609.4
mutant	170205 cell 2	1941					f	f	f	f	f	f	f	f	f	f
mutant	170205 cell 3	1989.7					mutant	mutant	mutant	mutant	mutant	mutant	mutant	mutant	mutant	mutant
mutant	170205 cell 4	724				radius	170124 cell 1	170124 cell 2	170126 cell 1	170126 cell 2	170202 cell 1	170202 cell 2	170205 cell 1	170205 cell 2	170205 cell 3	170205 cell 4
mutant	170202 cell 1	1926.9				10	1	1	3	2	4	4	4	3	4	3
mutant	170202 cell 2	1989.7				20	6	6	5	7	7	7	9	11	7	6
						30	9	6	9	11	11	12	10	16	12	9
						40	10	11	12	12	15	15	13	18	15	7
						50	10	12	16	12	16	17	14	18	17	7
						60	7	11	19	12	17	17	15	18	17	6
						70	7	10	18	11	16	16	12	17	16	5
						80	7	9	18	9	16	17	9	16	17	5
						90	7	9	16	8	15	15	8	11	15	3
						100	6	7	17	7	14	12	6	10	12	2
						110	5	5	16	5	10	9	4	4	9	2
						120	5	3	9	4	6	6	2	2	6	0
						130	2	2	3	2	3	4	2	0	4
						140	0	1	1	1	2	2	1		2
						150		1	1	1	0	1	1		1
						160		1	1	0		0	0		0
						170		0	1
						180			0

## Sheet: ED5d
Intrinsic excitability of D1 neurons (GFP+)																	Intrinsic Excitability of D2 neurons (GFP-)
	F	F	M	M	f	f	f	m	m	m	m							f	f	m	m	m	m	m	m	f	f	f	f	m	m	f	f
	control	control	control	control	control	control	control	control	control	control	control							control	control	control	control	control	control	control	control	control	control	control	control	control	control	control	control
current	160410 cell 1	160410 cell 2	160411 cell 1	160411 cell 2	160928 cell 2	160928 cell 3	160929 cell 1	160921 cell 1	160921 cell 2	160920 cell 1	160920 cell 2						current	170125 cell 1	170125 cell 2	170127 cell 1	170127 cell 2	170128 cell 1	170128 cel 2	170129 cell 1	170129 cell 2	170130 cell 1	170130 cell 2	170201 cell 1	170201 cell 2	170203 cell 1	170203 cell 2	170131 cell 1	170131 cell 2
-500	-98.816	-103.21	-109.833	-104.858	-96.741	-101.349	-127.889	-119.415	-104.004	-114.502	-111.755						-500	-102.386	-112.915	-115.967	-114.044	-113.129	-104.858	-102.844	-104.37	-156.769	-112.61	-121.857	-116.425	-118.225	-116.73	-112.091	-107.788
-480	-98.206	-102.966	-110.168	-104.828	-96.405	-101.013	-126.709	-118.195	-103.943	-114.105	-111.267						-480	-102.112	-113.098	-115.082	-113.708	-115.997	-104.553	-102.051	-103.882	-154.846	-111.908	-121.338	-115.997	-117.737	-115.967	-111.237	-107.727
-460	-98.419	-102.448	-108.887	-104.187	-96.1	-100.677	-124.298	-118.164	-103.027	-112.946	-111.298						-460	-101.654	-110.779	-115.112	-113.373	-115.497	-103.943	-100.464	-104.39	-151.825	-111.145	-120.697	-115.814	-117.554	-115.326	-111.176	-107.3
-440	-98.267	-102.234	-108.276	-103.607	-96.191	-100.159	-123.047	-117.126	-102.997	-112.793	-110.596						-440	-101.654	-110.291	-114.441	-113.251	-115.143	-103.821	-100.769	-104.462	-150.269	-110.138	-119.995	-115.723	-117.065	-114.716	-110.382	-106.415
-420	-97.626	-101.746	-108.032	-103.729	-96.222	-100.494	-121.826	-115.845	-102.722	-111.755	-109.924						-420	-101.074	-108.704	-114.014	-112.549	-113.983	-103.668	-100.189	-104.797	-148.346	-110.168	-119.263	-115.051	-116.364	-113.617	-109.955	-106.415
-400	-97.595	-101.349	-107.361	-103.302	-94.757	-99.762	-120.331	-115.051	-102.325	-111.053	-109.283						-400	-100.922	-108.49	-113.678	-112.213	-113.678	-103.149	-98.99	-104.34	-146.637	-109.192	-118.774	-114.471	-115.814	-113.159	-109.467	-106.049
-380	-97.046	-101.013	-106.567	-102.6	-96.1	-99.304	-118.988	-114.227	-101.135	-110.748	-109.009						-380	-100.342	-108.154	-113.19	-111.755	-111.908	-103.18	-98.663	-103.821	-144.226	-108.795	-117.676	-114.197	-114.899	-112.61	-108.704	-105.133
-360	-96.985	-100.311	-106.262	-102.631	-95.245	-98.846	-118.073	-112.701	-101.349	-109.283	-108.154						-360	-100.037	-108.612	-113.007	-110.992	-112.183	-102.692	-98.297	-102.997	-142.273	-108.459	-117.371	-113.525	-114.319	-111.877	-108.612	-105.042
-340	-96.893	-100.006	-106.018	-101.929	-95.917	-99.121	-117.096	-111.053	-100.342	-108.582	-107.605						-340	-99.274	-106.812	-112.457	-110.931	-111.572	-102.325	-97.992	-102.753	-139.801	-107.544	-116.638	-113.281	-113.678	-111.206	-107.849	-104.462
-320	-96.588	-99.854	-105.53	-101.471	-95.825	-98.48	-115.936	-111.237	-99.365	-108.276	-106.171						-320	-98.969	-106.11	-111.938	-110.229	-110.84	-101.685	-97.992	-102.814	-137.817	-106.262	-115.448	-113.159	-113.007	-110.443	-107.208	-103.882
-300	-95.734	-99.034	-104.584	-100.708	-94.849	-97.992	-115.112	-109.619	-99.67	-106.506	-105.194						-300	-98.602	-105.53	-111.389	-109.68	-109.985	-101.257	-97.931	-102.264	-135.62	-105.835	-114.899	-112.518	-112.366	-109.406	-106.964	-103.607
-280	-95.49	-98.419	-104.034	-100.372	-94.666	-98.083	-113.8	-108.124	-98.633	-106.903	-103.821						-280	-97.961	-104.889	-110.748	-108.917	-108.765	-100.372	-96.527	-97.046	-133.759	-105.072	-113.678	-111.664	-111.847	-108.582	-106.567	-103.119
-260	-95.032	-97.778	-103.058	-99.972	-94.757	-97.565	-112.518	-107.239	-98.145	-106.171	-102.966						-260	-97.29	-103.485	-110.168	-108.734	-107.758	-100.403	-96.191	-101.044	-131.042	-104.187	-112.579	-110.84	-110.657	-107.3	-105.998	-102.448
-240	-94.208	-96.924	-102.539	-99.182	-94.147	-96.649	-111.298	-105.53	-98.816	-105.347	-101.959						-240	-97.26	-103.119	-109.65	-108.002	-106.232	-99.396	-95.886	-99.792	-129.211	-102.509	-111.603	-110.718	-109.894	-106.628	-105.377	-101.807
-220	-93.567	-95.978	-101.776	-98.846	-93.933	-95.551	-110.535	-104.065	-97.565	-104.523	-101.105						-220	-96.527	-102.02	-107.941	-106.72	-105.957	-98.877	-94.208	-97.9	-126.526	-102.234	-110.565	-109.039	-108.673	-105.377	-104.614	-101.044
-200	-93.323	-95.123	-100.861	-98.022	-93.689	-95.49	-109.192	-102.365	-95.673	-103.424	-99.335						-200	-95.52	-100.83	-107.361	-105.53	-104.034	-97.504	-94.482	-97.961	-123.657	-101.349	-109.314	-109.039	-107.88	-104.034	-104.401	-100.281
-180	-92.438	-94.974	-100.006	-97.168	-93.262	-94.91	-108.246	-101.685	-95.062	-102.264	-98.45						-180	-94.971	-99.579	-106.598	-104.858	-102.142	-96.802	-93.933	-96.954	-120.972	-99.823	-107.788	-108.307	-105.713	-102.875	-103.455	-99.213
-160	-92.072	-93.842	-99.121	-96.619	-92.957	-94.025	-107.178	-100.189	-93.811	-101.379	-97.595						-160	-93.842	-98.236	-105.194	-103.088	-101.227	-95.734	-92.987	-95.917	-118.317	-98.755	-106.781	-107.3	-105.347	-101.532	-102.539	-98.541
-140	-91.248	-93.292	-97.748	-96.191	-92.255	-93.75	-105.562	-98.572	-92.377	-100.616	-95.795						-140	-93.14	-96.558	-103.973	-101.837	-99.03	-94.696	-91.98	-95.032	-115.265	-97.595	-105.225	-105.682	-103.76	-100.006	-101.624	-97.565
-120	-90.729	-92.01	-96.771	-95.154	-91.858	-92.529	-103.882	-97.015	-91.4	-99.335	-94.238						-120	-92.133	-94.238	-102.448	-99.976	-97.107	-92.743	-90.97	-94.33	-112.122	-96.497	-103.424	-103.485	-102.173	-98.236	-101.044	-96.68
-100	-90.332	-91.248	-95.428	-92.712	-91.492	-92.224	-102.448	-96.161	-89.996	-97.26	-92.59						-100	-91.248	-92.194	-100.8	-98.816	-95.093	-91.644	-90.332	-92.896	-108.673	-94.727	-100.922	-103.21	-100.494	-96.68	-99.365	-95.947
-80	-89.081	-89.905	-93.933	-92.529	-90.82	-91.4	-100.372	-94.879	-89.661	-96.283	-91.278						-80	-90.179	-89.223	-99.487	-97.198	-92.712	-89.355	-89.874	-91.522	-105.743	-93.17	-99.823	-99.213	-98.175	-94.818	-98.969	-94.666
-60	-88.379	-88.745	-92.438	-92.194	-90.881	-90.179	-98.032	-92.255	-89.172	-94.208	-90.21						-60	-89.783	-85.938	-97.473	-95.428	-89.386	-88.043	-88.165	-90.21	-101.196	-91.492	-97.534	-96.344	-96.13	-92.529	-97.382	-93.506
-40	-87.585	-87.128	-90.24	-90.637	-90.149	-87.952	-94.421	-90.21	-89.325	-92.041	-88.074						-40	-88.438	-82.52	-95.062	-92.957	-87.006	-85.419	-87.402	-85.388	-97.351	-89.264	-95.367	-93.689	-92.041	-90.118	-96.161	-91.492
-20	-87.097	-85.785	-87.769	-89.752	-89.539	-86.731	-91.278	-88.074	-88.593	-89.325	-86.09						-20	-87.036	-77.911	-92.865	-90.759	-84.106	-82.489	-86.09	-85.907	-92.224	-88.226	-91.553	-90.698	-88.623	-87.738	-95.306	-89.478
0	-86.334	-84.995	-85.571	-87.86	-88.379	-85.48	-82.123	-86.121	-87.921	-85.938	-84.656						0	-85.785	-72.968	-89.996	-86.334	-80.17	-79.346	-84.412	-84.198	-87.341	-85.938	-86.7	-86.304	-86.7	-84.869	-94.147	-87.555
20	-85.266	-83.008	-82.275	-86.548	-88.074	-83.221	-82.581	-84.106	-86.914	-82.52	-82.428						20	-84.32	-68.115	-88.257	-83.618	-75.653	-77.087	-83.374	-82.153	-80.505	-83.679	-83.74	-79.834	-82.977	-81.329	-92.316	-85.785
40	-83.832	-80.963	-79.132	-84.839	-86.194	-81.482	-78.369	-81.879	-85.571	-78.369	-80.566						40	-83.099	-62.225	-85.51	-80.597	-72.083	-74.646	-81.512	-79.803	-74.066	-81.696	-80.566	-74.89	-78.003	-78.003	-91.125	-82.855
60	-83.13	-78.583	-74.585	-83.099	-85.999	-78.644	-70.892	-78.583	-83.832	-72.662	-78.156						60	-80.872	2	-82.733	-76.63	-67.505	-72.357	-79.651	-74.402	3	-78.613	-76.965	2	-71.503	-73.7	-89.081	-80.322
80	-82.031	-77.209	-70.496	-81.268	-84.717	-76.53	-66.406	-75.439	-82.306	-64.491	-76.721						80	-79.224	4	-79.346	-71.381	-59.326	-69.427	-72.235	-72.815	8	-75.165	-70.374	6	-66.01	-69.244	-87.646	-77.087
100	-80.872	-74.585	-66.254	-78.796	-84.412	-74.097	-66.071	-72.723	-80.627	2	-74.219						100	-77.545	5	-75.226	-66.833	3	-66.803	-75.012	-68.085	12	-72.815	3	9	2	-65.247	-84.9	-71.228
120	-79.773	-72.357	-62.458	-76.08	-83.038	-70.312	-59.631	-69.336	-78.674	6	-71.35						120	-75.165	7	-69.458	-61.493	5	-63.904	-71.716	-60.364	14	-68.939	6	12	6	-62.225	-82.703	-69.611
140	-78.033	-69.794	-58.716	-72.571	-81.909	-67.078	-56.58	-64.58	-76.691	8	-68.512						140	-72.968	9	-62.886	4	7	-59.662	-67.596	4	17	-65.186	9	14	9	-58.044	-80.139	-64.728
160	-76.416	-65.521	-53.009	-69.183	-80.536	-64.209	-54.382	-60.852	-74.799	9	-65.674						160	-70.465	9	3	7	10	-56.732	-62.5	7	19	-62.378	11	16	11	1	-76.416	-59.052
180	-74.768	-64.453	2	-65.521	-78.857	-61.768	1	-55.084	-71.686	11	-62.012						180	-68.176	12	6	10	11	2	-57.922	8	21	-59.723	13	18	13	3	-73.334	3
200	-72.937	-62.283	4	-62.592	-77.271	-59.235	3	4	-69.244	11	-59.509						200	-65.216	12	8	12	12	5	2	10	23	-56.641	15	19	15	6	-69.916	5
220	-71.259	-59.592	6	-58.624	-75.47	-55.176	5	8	65.552	11	-55.298						220	-62.378	13	11	15	14	7	4	12	25	-53.192	17	20	17	8	-66.406	8
240	-69.122	-56.244	8	1	-72.998	-51.971	7	12	-61.584	10	-51.666						240	-59.784	13	14	17	15	10	6	13	26	-50.659	18	21	18	10	-62.317	10
260	-67.2	1	10	2	-70.496	1	9	15	-58.411	8	-49.591						260	1	14	16	18	16	13	7	14	27	-46.997	19	21	19	12	2	13
280	-65.43	3	11	3	-67.596	3	11	18	1	8	1						280	2	15	17	19	16	14	9	15	28	2	20	22	19	13	3	14
300	-64.117	4	12	4	-63.995	5	14	21	4	8	2						300	4	16	19	20	17	16	10	15	29	4	21	22	20	15	5	16
320	-62.592	5	14	6	-60.028	6	15	24	7	8	4						320	5	14	19	21	17	17	12	16	29	5	22	22	20	16	7	17
340	-60.211	6	14	7	1	8	16	26	9	8	6						340	7	16	20	22	15	18	13	15	30	7	23	22	18	17	9	18
360	-58.655	7	14	8	3	9	17	28	12	9	7						360	9	13	20	23	15	18	14	14	30	8	23	22	17	18	10	19
380	-55.847	9	16	9	5	10	18	29	14	8	8						380	10	13	20	23	14	19	15	14	32	9	24	22	17	19	12	19
400	2	10	16	10	8	11	18	30	17	7	10						400	11	15	20	23	12	18	15	14	31	11	24	22	16	19	13	20
420	3	11	16	11	10	12	19	31	19	4	11						420	12	16	19	23	11	16	16	bad spiking	31	12	24	22	15	20	15	20
440	5	12	16	12	11	13	18	32	20	5	13						440	14	15	19	23	10	17	16		32	13	24	21	13	20	16	20
460	6	13	17	12	13	14	20	33	22	5	14						460	15	14	19	22	9	14	17		32	14	24	21	12	21	17	20
480	8	14	17	13	15	14	21	34	24	4	15						480	16	16	19	22	10	16	17		31	14	24	21	10	21	18	20
500	9	14	17	14	16	15	21	35	25	5	16						500	17	16	19	22	9	13	17		32	15	23	21	9	17	19	20
	F	F	M	M	M	f	f	f	f	m	m	m	m	m	m
	mutant	mutant	mutant	mutant	mutant	mutant	mutant	mutant	mutant	mutant	mutant	mutant	mutant	mutant	mutant
current	160409 cell 1	160409 cell 2	160412 cell 1	160412 cell 2	160412 cell 3	160922 cell 1	160922 cell 2	160930 cell 1	160930 cell 2	160914 cell 1	160914 cell 2	160915 cell 1	160915 cell 2	160916 cell 1	160916 cell 2
-500	-101.715	-112.122	-102.325	-112.427	-101.196	-104.98	-109.009	-107.513	-103.973	-117.889	-98.236	-114.624	-101.471	-114.532	-116.425
-480	-102.448	-111.511	-101.868	-111.45	-100.647	-104.797	-108.612	-106.842	-103.333	-117.34	-98.114	-113.647	-101.349	-113.403	-115.723
-460	-102.386	-110.474	-101.471	-110.565	-100.006	-103.271	-109.619	-107.239	-102.936	-115.906	-97.656	-111.969	-101.227	-112.396	-114.99
-440	-101.99	-109.65	-101.044	-109.589	-99.972	-102.973	-108.124	-106.506	-102.905	-115.814	-97.321	-111.42	-101.288	-111.664	-113.8			f	f	f	f	f	f	f	f	f	f
-420	-101.654	-109.1	-100.525	-108.704	-99.152	-103.18	-107.788	-106.506	-102.417	-115.448	-96.649	-110.748	-100.769	-111.023	-113.586			mutant	mutant	mutant	mutant	mutant	mutant	mutant	mutant	mutant	mutant
-400	-101.044	-108.551	-100.342	-107.849	-98.297	-103.424	-107.3	-106.262	-101.746	-114.929	-96.741	-110.138	-99.976	-110.168	-112.976		current	170124 cell 1	170124 cell 2	170126 cell 1	170126 cell 2	170202 cell 1	170202 cell 2	170205 cell 1	170205 cell 2	170205 cell 3	170205 cell 4
-380	-100.739	-107.849	-100.006	-107.269	-98.206	-102.57	-106.628	-105.53	-100.769	-113.159	-96.191	-108.704	-100.037	-109.1	-111.816		-500	-110.87	-114.502	-107.422	-108.521	-123.627	-105.53	-127.441	-115.723	-109.131	-104.553
-360	-100.128	-107.361	-99.609	-106.14	-97.748	-101.959	-106.476	-105.652	-100.8	-112.03	-95.764	-107.391	-100.464	-108.124	-111.298		-480	-111.176	-114.227	-107.422	-108.032	-122.803	-105.316	-125.488	-115.448	-110.321	-104.584
-340	-99.64	-106.842	-99.152	-105.133	-97.955	-101.349	-106.11	-104.37	-100.311	-111.45	-95.032	-106.506	-99.762	-107.269	-110.321		-460	-111.359	-114.288	-106.201	-106.75	-122.314	-105.072	-123.932	-115.112	-109.161	-104.187
-320	-99.304	-106.323	-98.602	-104.43	-96.863	-101.318	-105.164	-105.225	-100.2	-110.748	-95.001	-105.865	-99.243	-106.934	-109.863		-440	-110.199	-113.647	-106.049	-105.652	-121.918	-104.553	-122.925	-114.349	-109.65	-104.034
-300	-98.267	-105.865	-98.511	-103.363	-96.191	-101.227	-105.103	-105.042	-99.548	-109.528	-94.055	-104.95	-98.663	-105.438	-109.161		-420	-109.772	-113.312	-106.537	-104.828	-121.307	-104.462	-121.674	-113.525	-108.795	-103.088
-280	-97.87	-104.95	-97.992	-102.234	-95.795	-100.189	-104.34	-104.584	-98.907	-108.643	-93.536	-103.973	-98.663	-104.767	-108.032		-400	-109.406	-112.915	-105.743	-102.844	-120.88	-104.187	-120.758	-113.037	-109.039	-102.509
-260	-97.26	-104.523	-97.504	-101.074	-95.062	-99.609	-104.431	-104.156	-98.541	-108.063	-93.262	-103.241	-97.473	-103.363	-106.964		-380	-108.917	-112.64	-105.53	-102.417	-120.026	-103.455	-119.202	-112	-108.063	-101.776
-240	-96.832	-103.79	-96.863	-100.311	-94.421	-99.457	-103.21	-104.187	-97.565	-107.422	-92.377	-102.509	-97.534	-102.509	-106.415		-360	-108.673	-112.396	-104.98	-101.959	-119.476	-102.356	-117.92	-111.084	-106.537	-101.318
-220	-96.22	-102.875	-96.802	-99.304	-93.567	-98.877	-103.18	-103.394	-97.29	-106.323	-92.102	-101.471	-97.137	-101.379	-105.438		-340	-108.124	-112.061	-104.492	-100.952	-118.896	-102.905	-116.791	-110.199	-106.506	-100.891
-200	-95.428	-102.478	-96.1	-98.114	-92.621	-97.656	-102.02	-102.783	-96.893	-105.53	-91.187	-100.708	-96.252	-99.762	-103.943		-320	-107.544	-111.359	-103.821	-99.304	-118.317	-102.448	-115.051	-109.558	-105.621	-100.189
-180	-94.453	-101.532	-95.49	-96.741	-92.224	-97.076	-102.112	-102.295	-96.313	-104.706	-90.82	99.518	-96.497	-99.06	-103.394		-300	-107.452	-110.87	-103.76	-98.541	-117.554	-102.234	-113.8	-108.398	-104.706	-99.487
-160	-93.842	-100.647	-95.032	-95.886	-91.705	-96.527	-101.501	-101.593	-95.734	-104.279	-90.088	-98.45	-95.276	-97.076	-102.295		-280	-106.171	-110.229	-102.966	-96.802	-116.669	-99.457	-112.244	-106.964	-103.363	-98.938
-140	-92.987	-99.792	-94.604	-94.482	-90.759	-95.276	-100.586	-101.41	-94.177	-102.661	-90.118	-97.809	-95.459	-95.703	-100.647		-260	-105.804	-110.992	-101.99	-96.405	-115.631	-100.555	-111.237	-105.591	-101.379	-98.083
-120	-92.255	-98.419	-93.872	-93.109	-89.508	-92.987	-100.739	-100.677	-92.987	-101.169	-88.776	-96.466	-94.241	-94.727	-99.426		-240	-104.889	-108.368	-101.532	-94.33	-115.112	-100.372	-110.26	-104.98	-100.861	-97.839
-100	-91.4	-96.619	-92.896	-92.072	-88.623	-91.187	-99.121	-100.128	-92.621	-99.823	-88.806	-95.886	-93.75	-92.865	-98.114		-220	-104.126	-107.452	-101.318	-93.506	-114.441	-99.884	-108.948	-103.516	-98.694	-97.198
-80	-90.24	-95.673	-91.644	-90.79	-87.646	-91.461	-99.426	-99.182	-92.01	-97.748	-87.677	-94.94	-93.567	-91.187	-97.198		-200	-102.966	-106.506	-100.464	-91.522	-113.281	-99.091	-107.208	-102.356	-97.839	-96.252
-60	-89.386	-93.597	-90.485	-89.661	-86.731	-84.198	-98.389	-97.961	-89.996	-96.191	-87.067	-93.658	-92.59	-89.355	-95.947		-180	-102.264	-104.126	-99.274	-90.21	-112	-98.511	-105.835	-100.922	-96.13	-95.856
-40	-88.351	-90.942	-89.478	-88.348	-85.724	-88.898	-97.717	-95.978	-89.335	-93.414	-85.663	-93.048	-91.583	-87.592	-93.719		-160	-101.227	-102.539	-98.724	-89.386	-110.809	-97.656	-104.309	-100.037	-95.49	-95.123
-20	-87.433	-88.074	-88.135	-86.823	-84.534	-86.395	-97.015	-95.49	-87.892	-89.325	-85.144	-91.583	-90.881	-85.449	-91.858		-140	-100.098	-101.288	-98.114	-89.111	-109.131	-96.344	-102.356	-98.236	-93.994	-94.055
0	-86.344	-83.893	-86.975	-85.724	-83.466	-86.09	-95.703	-94.36	-86.609	-85.571	-83.984	-90.118	-90.057	-83.344	-89.844		-120	-98.694	-97.321	-97.168	-86.548	-107.086	-95.276	-99.792	-96.985	-92.957	-92.621
20	-85.205	-79.773	-85.419	-84.167	-81.97	-84.137	-95.123	-93.658	-85.022	-80.963	-83.16	-89.172	-88.715	-81.085	-87.097		-100	-96.863	-97.565	-96.313	-84.93	-105.194	-94.666	-97.443	-95.062	-91.125	-91.461
40	-83.649	-74.829	-83.801	-82.825	-80.841	-82.794	-94.086	-91.949	-83.252	-77.271	-82.367	-87.677	-87.83	-78.888	-84.717		-80	-95.886	-94.757	-94.574	-83.13	-103.241	-93.414	-94.543	-93.262	-89.447	-89.844
60	-82.275	-69.489	-81.97	-80.963	-79.498	-78.43	-92.865	-90.149	-81.024	-72.479	-81.116	-86.731	-86.67	-75.012	-81.97		-60	-93.781	-92.194	-93.506	-81.39	-100.739	-92.346	-91.644	-90.546	-87.25	-88.44
80	-80.841	-64.484	-80.139	-79.468	-78.094	-66.803	-92.102	-88.104	-79.132	-68.024	-80.292	-85.48	-84.869	-72.571	-78.644		-40	-91.156	-89.569	-92.01	-80.139	-97.931	-90.79	-87.524	-89.142	-85.449	-87.067
100	-79.132	-59.113	-77.606	-77.911	-76.66	-74.585	-91.248	-87.25	-76.965	-63.843	-78.918	-84.045	-84.412	-69.885	-75.012		-20	-88.898	-85.968	-90.546	-77.24	-94.086	-89.539	-83.008	-86.304	-82.733	-85.327
120	-77.393	1	-75.348	-76.66	-75.378	-71.442	-90.363	-85.602	-74.707	-60.028	-77.393	-82.367	-82.245	-66.406	-71.411		0	-86.975	-82.581	-87.463	-75.256	-89.539	-87.921	-77.942	-84.229	-80.231	-83.405
140	-75.643	3	-72.174	-74.615	-73.639	-68.756	-89.447	-82.397	-71.198	-54.291	-75.714	-80.75	-80.505	-61.34	-66.528		20	-83.038	-78.003	-85.876	-73.425	-84.839	-85.968	-71.991	-81.085	-77.332	-81.573
160	-73.334	5	-69.427	-72.998	-72.113	-66.467	-87.86	-80.597	-66.864	2	-74.951	-79.59	-78.491	3	-62.225		40	-80.048	-74.768	-83.191	-70.892	-78.705	-84.29	-65.216	-77.728	-74.677	-78.766
180	-71.136	7	-66.132	-71.167	-70.465	-63.995	-86.06	-77.728	-61.523	4	-73.364	-77.179	-76.141	5	1		60	-76.294	-70.221	-80.292	-68.634	-71.869	-81.909	1	-72.144	-70.923	-75.195
200	-68.542	9	-63.782	-69.773	-68.817	-61.371	-84.93	-74.677	2	6	-71.106	-75.5	-75.47	7	4		80	-72.021	-65.704	-76.447	-65.948	-65.765	-80.109	3	-66.986	-66.376	-72.754
220	-65.552	10	-60.608	-67.413	-66.528	1	-83.374	-71.32	4	7	-69.031	-73.181	-70.831	10	6		100	-68.207	1	-72.266	-63.538	3	-78.522	6	-60.883	-58.197	-68.756
240	-62.805	11	-56.976	-65.216	-64.392	3	-81.573	1	6	9	-67.23	-70.74	-67.902	12	8		120	1	4	-66.01	-59.937	6	-76.874	8	1	-57.8	-65.033
260	-60.242	12	1	-63.202	-62.774	5	-79.559	3	8	11	-65.125	-68.239	-64.331	14	11		140	4	7	1	-57.251	9	-74.524	10	4	1	-60.76
280	-56.58	12	3	-61.157	-60.577	7	-77.362	5	10	11	-62.683	-65.857	-60.394	15	12		160	7	10	4	1	11	-72.479	11	7	4	-57.19
300	-52.521	13	5	-58.441	-58.105	9	-73.882	7	11	13	-60.699	-61.554	2	17	14		180	10	12	7	3	13	-69.763	12	10	8	2
320	2	13	6	-55.817	-55.939	10	-71.198	9	13	14	-58.716	-57.983	5	18	16		200	12	14	8	7	16	-67.871	14	13	11	4
340	4	12	8	-53.528	-53.619	11	1	11	14	15	-56.976	-54.504	7	19	16		220	14	16	11	11	17	-65.765	14	16	14	7
360	5	12	9	-50.69	-50.873	12	2	13	15	15	-55.42	-50.14	9	20	18		240	15	17	13	14	19	-63.507	14	18	16	9
380	7	11	9	-48.95	1	13	4	14	16	15	-52.765	-46.173	10	20	19		260	17	19	14	15	19	-60.852	14	20	19	10
400	9	12	12	-45.99	3	14	6	16	17	15	-51.819	2	12	21	19		280	19	20	15	17	21	-57.739	14	22	20	12
420	11	11	13	-43.732	5	15	7	17	18	16	-50.262	4	13	22	20		300	20	21	16	19	21	3	13	22	21	14
440	12	11	14	-41.26	6	16	9	18	18	17	-48.309	5	15	22	20		320	21	22	16	20	22	5	12	22	23	16
460	13	bad spiking	15	-38.666	8	16	10	19	19	15	-47.302	7	16	23	20		340	21	23	17	22	21	7	11	21	23	16
480	14		15	-35.522	10	17	11	22	20	16	-44.403	9	17	24	21		360	22	24	16	22	21	8	14	22	24	18
500	16		16	1	12	18	12	21	20	15	2	11	19	24	21		380	22	25	17	24	20	10	12	21	24	19
																	400	22	25	16	26	19	12	12	22	25	19
																	420	21	26	17	27	16	14	6	22	25	20
																	440	21	26	16	27	16	15	5	20	25	21
																	460	20	26	15	28	16	16	5	20	25	21
																	480	19	26	14	29	16	17	4	20	25	21
																	500	19	26	13	30	16	18	4	16	25	21

## Sheet: ED5e
Dendritic excitability of D1 neurons (GFP+)
distal dendrite					distal spine				proximal dendrite				proximal spine				index (distal area/proximal area)
control	peak	total area	average area		peak	total area	average area		peak	total area	average area		peak	total area	average area		dendrite	spine
160410 cell 1	0.2541	56.4719	0.0576		0.144	45.3093	0.0504		0.3153	73.1247	0.082		0.2874	113.1	0.3215		0.772268	0.400612
160410 cell 2	0.1378	23.5778	0.0348		0.1382	48.0915	0.0566		0.297	57.8179	0.0656		0.2231	47.0716	0.0647		0.407794	1.02167
160411 cell 1	0.3199	80.788	0.0821		0.3165	82.9655	0.0812		0.5656	104.411	0.118		0.5337	114.278	0.1292		0.773751	0.725996
160411 cell 2	0.1391	24.1384	0.0326		0.1228	34.6554	0.0411		0.4234	62.5323	0.0762		0.3491	42.4977	1.5555		0.386015	0.815465
160920 cell 1	0.038	7.3833	0.0104		0.0376	0.4791	0.0007		0.1336	14.1551	0.0199		0.0705	4.5586	0.0064		0.5216	0.105098
160920 cell 2	0.041	1.4981	0.0021		0.0297	1.4517	0.002		0.1454	12.77	0.018		0.1111	8.4995	0.012		0.117314	0.170798
160921 cell 1	0.1089	7.9497	0.0109		0.0838	8.4665	0.0116		0.2996	40.221	0.055		0.1642	23.3603	0.032		0.19765	0.362431
160921 cell 2	0.1627	20.2396	0.0264		0.0969	10.8179	0.0141		0.3202	60.9787	0.0794		0.313	40.2303	0.0524		0.331913	0.268899
160928 cell 1	0.2157	38.8433	0.0571		0.1261	22.9975	0.0338		0.4135	96.3091	0.1415		0.3483	75.9082	0.115		0.403319	0.302965
160928 cell 2	0.2491	46.1634	0.0678		0.1851	31.6879	0.0465		0.362	76.8627	0.1129		0.2888	61.7908	0.0908		0.600596	0.512826
160928 cell 3	0.3443	72.6047	0.1066		0.3371	74.9876	0.1101		0.6304	138.059	0.2028		0.4888	100.802	0.1481		0.525895	0.74391
160929 cell 1	0.0776	12.875	0.022		0.0974	7.056	0.012		0.3077	41.6088	0.071		0.3092	40.7693	0.0696		0.30943	0.173071
distal dendrite					distal spine				proximal dendrite				proximal spine				index (distal area/proximal area)
mutant	peak	total area	average area		peak	total area	average area		peak	total area	average area		peak	total area	average area		dendrite	spine
160409 cell 1	0.1208	24.2235	0.0233		0.1385	34.2723	0.0427		0.2272	66.2597	0.0545		0.3349	103.886	0.0904		0.365584	0.329902
160409 cell 2	0.4668	99.6603	0.0938		0.412	105.333	0.0916		0.4393	102.854	0.0986		0.3586	100.508	0.0929		0.968949	1.048
160412 cell 1	0.2707	61.8289	0.0598		0.2343	66.491	0.0643		0.4227	103.207	0.1022		0.436	113.297	0.1122		0.59908	0.586873
160412 cell 2	0.0655	20.1813	0.0222		0.097	37.2351	0.0339		0.2624	62.6759	0.0601		0.2148	39.6028	0.0402		0.321995	0.940214
160412 cell 3	0.0519	10.9264	0.0132		0.0474	6.6764	0.0065		0.2468	60.0297	0.046		0.1855	50.4395	0.0464		0.182017	0.132365
160914 cell 1	0.3822	75.2325	0.0978		0.2746	58.7508	0.0764		0.503	122.261	0.1589		0.4448	104.322	0.1356		0.615344	0.563167
160914 cell 2	0.2078	32.2668	0.0419		0.1987	36.6584	0.0476		0.3463	73.4484	0.0955		0.3279	62.909	0.0818		0.439312	0.582721
160915 cell 1	0.1631	22.7531	0.0296		0.0776	15.8611	0.0206		0.2602	45.1559	0.0587		0.2269	30.9604	0.0402		0.503879	0.512303
160915 cell 2	0.278	63.3276	0.0823		0.2026	47.2691	0.0614		0.4537	112.068	0.1457		0.4067	103.051	0.1339		0.565083	0.458694
160916 cell 1	0.1905	42.0054	0.0504		0.1198	18.3464	0.0222		0.5506	165.075	0.1982		0.5765	135.395	0.1626		0.254463	0.135503
160916 cell 2	0.3827	95.3443	0.1145		0.2391	57.4753	0.069		0.6464	160.326	0.1925		0.5271	143.799	0.1727		0.594689	0.399691
160922 cell 1	0.2538	53.813	0.0726		0.2053	41.835	0.0565		0.5653	168.744	0.2278		0.559	164.787	0.2224		0.318903	0.253873
160922 cell 2	0.1596	27.898	0.0452		0.1277	26.3949	0.0427		0.3211	50.8418	0.0823		0.2482	35.9595	0.0582		0.548722	0.734017
160930 cell 1	0.0675	2.974	0.0048		0.0564	10.0792	0.0162		0.2472	61.5807	0.099		0.1789	37.7934	0.0608		0.0482944	0.266692
160930 cell 2	0.1648	28.6577	0.0461		0.1114	20.6966	0.0333		0.2889	54.837	0.0882		0.2959	55.1628	0.0887		0.522598	0.375191
Dendritic excitability of D2 neurons (GFP-)
distal dendrite					distal spine				proximal dendrite				proximal spine				index (distal area/proximal area)
control	peak	total area	average area		peak	total area	average area		peak	total area	average area		peak	total area	average area		dendrite	spine
170125 cell 1	0.1735	45.0796	0.0564		0.144	33.7918	0.0423		0.4464	100.074	0.1253		0.3798	82.6886	0.1035		0.450464	0.408663
170125 cell 2	0.3229	73.4232	0.0919		0.2894	68.6213	0.0859		0.3998	91.0073	0.1139		0.3596	70.9448	0.0888		0.806784	0.967249
170127 cell 1	0.1963	33.1068	0.0377		0.1933	0.1933	0.0505		0.3162	58.8908	0.0671		0.2602	44.0907	0.0502		0.562173	0.00438414
170127 cell 2	0.1785	33.7663	0.0385		0.1698	39.1393	0.0446		0.468	103.843	0.1183		0.3756	72.1167	0.0822		0.325166	0.542722
170128 cell 1	0.0817	9.2479	0.0135		0.0422	3.6735	0.0054		0.2817	53.164	0.0776		0.2014	30.557	0.0446		0.17395	0.120218
170128 cel 2	0.1305	22.4963	0.0328		0.1187	16.154	0.0236		0.2278	26.403	26.403		0.1758	47.4883	0.0693		0.852036	0.340168
170129 cell 1	0.1662	31.7815	0.0464		0.1978	32.4847	0.0474		0.3908	66.189	0.0966		0.38	66.4605	0.097		0.480163	0.488782
170129 cell 2	0.1793	22.9074	0.0334		0.1596	13.2738	0.0194		0.2633	38.7589	0.0566		0.2441	39.7697	0.058		0.591023	0.333767
170130 cell 1	0.2571	39.1711	0.0572		0.1681	31.6111	0.0461		0.2749	44.5331	0.065		0.1931	30.0422	0.0438		0.879595	1.05222
170130 cell 2	0.1918	34.4748	0.0354		0.2476	54.4208	0.0558		0.2971	65.3416	0.067		0.2641	53.9924	0.0554		0.527609	1.00793
170201 cell 1	0.2292	36.2722	0.0519		0.2159	37.7806	0.0541		0.4317	75.3812	0.1079		0.3701	53.7988	0.077		0.481184	0.702257
170201 cell 2	0.3047	54.3388	0.0778		0.2767	53.0013	0.0758		0.5453	117.615	0.1683		0.4826	102.712	0.147		0.462005	0.516018
170203 cell 1	0.155	27.0982	0.0422		0.1331	17.4862	0.0272		0.3839	65.0565	0.1013		0.404	62.4423	0.0973		0.416533	0.280038
170203 cell 2	0.1131	15.3133	0.0238		0.11	10.1691	0.0158		0.135	16.9616	0.0264		0.0822	22.2842	0.0347		0.902822	0.456337
170131 cell 1	0.2529	37.6961	0.0539		0.2597	38.3699	0.0549		0.5431	101.623	0.1454		0.4742	80.2939	0.1149		0.370942	0.477868
170131 cell 2	0.2132	40.4307	0.0579		0.174	26.5419	0.038		0.5723	89.9742	0.1287		0.4531	68.6641	0.0983		0.449359	0.386547
distal dendrite					distal spine				proximal dendrite				proximal spine				index (distal area/proximal area)
mutant	peak	total area	average area		peak	total area	average area		peak	total area	average area		peak	total area	average area		dendrite	spine
170124 cell 1	0.2745	75.7913	0.0817		0.1979	53.5051	0.0577		0.4873	118.129	0.1273		0.3172	98.1692	0.1058		0.641597	0.545029
170124 cell 2	0.1769	35.1206	0.0379		0.2018	44.2056	0.0476		0.3182	78.3953	0.0845		0.2054	47.6242	0.0513		0.447994	0.928217
170126 cell 1	0.1821	35.3125	0.0442		0.1453	30.1494	0.0377		0.5073	98.7057	0.1235		0.4769	88.5446	0.1108		0.357755	0.3405
170126 cell 2	0.0928	18.9312	0.0237		0.0966	23.4306	0.0293		0.2425	49.5583	0.062		0.1735	45.5712	0.057		0.381999	0.514154
170202 cell 1	0.2361	43.0382	0.061		0.2556	42.368	0.0601		0.4323	67.5795	0.0958		0.4479	71.8008	0.1018		0.636853	0.590077
170202 cell 2	0.1447	13.4589	0.0191		0.103	13.8031	0.0196		0.3081	50.3419	0.0714		0.2495	49.5108	0.0702		0.26735	0.27879
170205 cell 1	0.2184	39.528	0.06		0.2123	45.2576	0.0687		0.533	86.7436	0.1317		0.4081	68.5319	0.1041		0.455688	0.660387
170205 cell 2	0.1976	22.3722	0.034		0.1851	26.8332	0.0407		0.2893	38.929	0.0591		0.2974	40.827	0.062		0.574692	0.657242
170205 cell 3	0.1913	26.9516	0.0409		0.1267	23.9562	0.0364		0.3718	64.24	0.0976		0.455	62.0917	0.0943		0.419545	0.38582
170205 cell 4	0.1604	24.4385	0.0371		0.1398	29.4889	0.0448		0.3503	54.7118	0.0831		0.287	42.1571	0.064		0.446677	0.6995

## Sheet: ED5f
Frequency of sEPSCs in D1 neurons (Hz)						Amplitude of sEPSCs in D1 neurons (pA)
Il34fl/fl Drd1a-tdTomato(19/5)	Il34fl/fl Drd1a Cre/+Drd1a-tdTomato (16/5)					Il34fl/fl Drd1a-tdTomato(19/5)	Il34fl/fl Drd1a Cre/+Drd1a-tdTomato (16/5)
4.061	4.893					-19.092	-18.615
3.233	6.73					-13.901	-20.393
3.526	9.26					-37.309	-21.373
6.908	4.94					-21.722	-18.824
2.295	2.417					-16.717	-17.062
6.893	3.263					-17.566	-18.666
8.942	4.293					-17.487	-18.445
8.723	7.104					-20.73	-19.423
5.506	6.061					-15.403	-20.735
3.503	3.3					-19.182	-17.244
3.545	3.567					-20.969	-20.121
2.17	5.167					-13.857	-19.624
3.567	6.369					-19.077	-18.72
2.963	2.356					-22.335	-16.335
2.922	5.722					-13.716	-19.513
3.817	8					-16.516	-18.799
3.354						-19.187
4.039						-22.197
3.063						-20.021

## Sheet: ED5g
Membrane bound DRD1 (normalized to total DRD1) in ex vivo slices
Il34 fl/fl	Il34 fl/fl Drd1a cre/+
0.764029	0.65534
1.84419	1.17345
1.84419	0.461173
0.74726	0.702987
0.698484	0.0453029
0.101838	0.348237

## Sheet: ED5j
RPKM (RNAseq) for striatal cell type specific genes
		Il34 fl/fl				Il34 fl/fl Drd1a Cre+				p value
MSN	Ppp1r1b	0.815789	0.937478	1.10971	1.13702	1.02268	0.787997	0.877424	1.02945	0.488744
	Gad2	0.93191	1.09746	1.11076	0.859866	0.958445	0.92067	1.07542	1.03798	0.979918
	Adora1	1.13219	0.908286	0.970654	0.988869	0.874731	1.23567	0.861637	0.803857	0.62633
D1 MSN	Drd1a	0.899005	0.939629	1.01949	1.14188	1.06269	0.876097	1.73746	1.24091	0.278851
	Slc35d3	0.858266	0.970284	0.821099	1.35035	1.07366	0.988008	1.0295	1.06173	0.765614
	Foxp1	0.910804	0.951293	1.04598	1.09193	1.07843	0.782691	0.85763	0.95277	0.322945
	Pcdh8	1.11681	1.09083	0.756188	1.03617	1.13667	0.659223	0.793612	0.707096	0.243745
D2 MSN	Drd2	0.766289	0.990666	1.11123	1.13181	1.13917	0.743066	1.0078	0.933345	0.720695
	Dner	1.16657	1.15338	0.917543	0.7625	0.986647	0.911901	0.765461	0.681726	0.220515
	Synpr	0.991061	0.937878	0.936497	1.13456	1.3341	0.578695	1.02341	0.865135	0.772695
	Ubp1	1.07683	0.991846	1.09872	0.832597	1.05586	1.16824	0.763538	1.01928	0.987354
	Ptprm	0.883754	1.08368	1.04214	0.990432	1.08287	0.880678	1.06666	0.932862	0.893131
	Gpr6	0.81928	1.00282	1.0034	1.1745	0.892473	0.785891	0.947072	0.774894	0.123531
	Adora2a	0.715905	0.919578	0.979088	1.38543	1.22797	0.662593	0.788694	0.780224	0.49821
Interneuron	Calb1	0.861904	1.02693	1.0478	1.06337	1.21013	0.767708	0.984641	1.07069	0.9389
	Pavb	0.918033	0.88085	1.10488	1.09624	1.06654	0.889068	0.522179	0.883238	0.259801
	Sst	1.06859	0.988204	0.925331	1.01787	0.958655	1.10404	0.885671	0.657584	0.352668
Astrocyte	Aldh1l1	0.964163	0.972309	1.11035	0.953175	0.843776	1.22899	0.977402	0.913644	0.924631
	Klf15	1.1343	1.05792	1.29403	0.513744	0.612954	1.20446	1.0137	1.18975	0.981718
Oligodendrocyte	Olig2	1.03298	1.14051	1.16476	0.661747	0.697346	1.04992	0.85879	0.804248	0.325773
	Mbp	0.985859	1.09698	1.15959	0.757573	0.865828	1.35497	0.906132	0.94299	0.907324
Microglia	P2ry12	1.02467	1.05353	0.855461	1.06633	0.635094	0.665167	0.453513	0.298332	0.00259501
	Siglech	0.914772	0.985233	0.946819	1.15318	0.580444	0.677999	0.420402	0.397567	0.00133324
	Cx3cr1	0.740456	1.20117	0.86114	1.19724	0.6592	0.6169	0.490452	0.28714	0.0149852
	Csf1r	0.846332	1.0921	0.988704	1.07286	0.594305	0.827999	0.592208	0.47028	0.0066766
	Tmem119	0.752953	1.12671	1.16566	0.954674	0.644214	0.569437	0.551431	0.409956	0.00511108
	Fcrls	0.983461	1.10554	1.02164	0.88936	0.846799	0.840257	0.642881	0.398882	0.0324463

## Sheet: ED5k
RPKM (RNAseq) for astrocyte activation genes, identified in Liddelow et al, 2017
		Il34 fl/fl				Il34 fl/fl Drd1a Cre+				p-value
Pan Reactive	Cd44	0.742511	0.731538	1.36595	1.16	0.873156	1.07367	1.00042	1.1305	0.911179
	Osmr	1.06512	0.8236	1.1834	0.927884	1.037	1.46871	1.18917	0.820342	0.444188
	Cp	0.872755	1.10092	1.12608	0.90025	1.27033	1.07146	1.08771	0.941682	0.363815
	Vim	1.05303	0.920256	1.12329	0.903427	0.879261	1.2155	0.894324	0.885781	0.760139
	Gfap	0.818723	1.19347	1.20988	0.777935	0.567203	1.21969	0.813752	0.7229	0.387978
A1 Reactive	Serping1	0.912651	1.25011	0.939287	0.897953	0.686338	1.4766	1.02369	0.803331	0.990069
	Ggta1	0.785598	0.792343	1.5819	0.84016	1.32102	1.13037	1.10679	0.571237	0.902176
	Fkbp5	0.991263	0.914678	1.40054	0.693514	0.605006	0.906063	0.990358	1.03319	0.534132
	Psmb8	1.65223	0.811164	0.558228	0.978382	0.93682	1.58636	0.343193	0.430909	0.651079
	Srgn	0.88409	1.17192	1.14281	0.80118	0.487397	0.718619	1.04384	0.491489	0.0977047
A2 Reaction	Clcf1	2.0363	0.858855	0.649503	0.455342	0.447473	0.61263	0.346067	0	0.137047
	Tm4sf1	0.831181	0.706582	0.862202	1.60004	0.873546	0.896971	0.957077	0.970192	0.72403
	S100a10	0.840006	0.934197	1.14892	1.07687	0.820226	1.10726	0.762991	0.520078	0.206029
	Emp1	0.292803	1.61721	1.36977	0.720219	1.25826	0.753668	1.15557	0.859101	0.984334
	B3gnt5	1.08272	0.60721	1.28576	1.02431	1.8119	0.964697	0.648744	0.806411	0.851266

## Sheet: ED5l
RPKM (RNAseq) for select microglia sensome genes (normalized to Hexb RPKM), identified in Hickman et al, 2013
	Il34 fl/fl				Il34 fl/fl Drd1a Cre+				p-value
P2ry12	0.417405	1.36364	1.20724	1.01171	0.560062	0.940074	0.856633	0.807526	0.384278
P2ry13	0.611556	1.18129	1.28014	0.927017	0.634076	0.730816	0.610449	0.76041	0.085489
P2ry6	0.150228	1.29115	1.35089	1.20773	1.00786	1.38654	1.20541	0.513683	0.936457
Gpr34	0.330039	1.30009	1.37898	0.990891	0.553547	1.22306	0.94081	1.15203	0.911628
Tmem173	0.530091	1.01243	1.30002	1.15746	1.42252	0.938965	0.895453	1.35943	0.5036
Csf1r	0.729122	1.03862	1.15401	1.07825	0.497311	1.07909	1.03152	1.17385	0.770386
Tgfbr1	0.883116	1.14146	0.967172	1.00825	1.07173	0.877847	1.27325	1.4281	0.261496
Tgfbr2	1.13178	1.091	0.925209	0.852015	1.31802	0.854061	0.874763	1.25956	0.603979
Il6ra	1.48313	0.971194	0.61199	0.933683	0.966584	0.65184	0.626343	0.796928	0.268259
Cx3cr1	0.726715	0.954223	1.33286	0.9862	0.412536	0.84427	0.897091	0.752637	0.150351
C3ar1	0.595523	1.05984	1.31296	1.03167	0.726414	1.37789	1.39466	0.833033	0.731583
Cmklr1	0.799643	0.916348	1.04591	1.2381	0.858351	0.559117	1.35079	1.36713	0.882045
Cmtm6	1.37445	1.02453	0.832583	0.768439	1.64518	0.868379	1.01473	1.25946	0.400419
Selplg	0.521268	1.27434	0.999976	1.20442	0.475607	1.0147	1.08307	1.10509	0.73438
Ly86	0.701597	1.13527	1.20373	0.959404	0.662455	1.07197	0.960206	0.766351	0.389322
Cd180	0.726079	1.05582	1.1961	1.022	1.54992	1.08921	0.933831	0.902808	0.531186
Tlr4	0.278076	1.46052	1.06083	1.20057	0.373114	1.55546	1.7028	1.42626	0.528404
Tlr7	0.212555	1.11639	0.97016	1.70089	0.463451	0.705947	1.02107	1.4536	0.819657
Clec5a	0.516795	1.43942	0.915351	1.12843	0.462281	1.15631	1.30949	0.736294	0.769787
Itgam	0.655892	1.17791	1.18973	0.976469	0.630489	1.17184	0.830971	1.16321	0.78924
Itgb2	0.661543	1.17324	0.927083	1.23814	1.26806	1.32159	1.39688	1.2926	0.0544867
Ecscr	0.887608	1.27144	1.04809	0.792863	0	0.992996	0.749692	0.758761	0.1695
Lair1	0.869063	1.21295	1.0687	0.849283	0.687691	0.919275	0.978706	1.23818	0.767626
Siglech	0.876077	1.0972	1.01752	1.00921	0.693735	0.86361	0.715693	0.969893	0.0549508
Slc2a5	1.11364	1.11665	0.940728	0.828976	1.49426	1.4639	1.03467	0.761588	0.359899
Lgals9	1.03971	0.725561	1.06787	1.16686	1.18043	0.80526	0.911933	0.820413	0.604695
Cd33	1.12544	1.00147	1.04549	0.827604	0.366082	0.929995	0.720131	0.845457	0.0869201
Slco2b1	0.677827	1.03837	1.30832	0.975487	0.757908	0.837299	1.07345	1.7383	0.706327
Cd84	0.753311	0.999136	1.02636	1.22119	0.449232	1.1939	1.55531	1.00171	0.847948
Tyrobp	0.873372	1.22948	1.0094	0.887753	0.48491	1.26345	0.934804	0.978293	0.65619
Ptprc	0.806086	0.989712	1.00413	1.20007	0.309024	1.03062	1.11852	1.47659	0.951566
Fcer1g	0.478975	1.11984	1.20616	1.19502	0.709158	1.17332	1.21366	1.32717	0.649762
Fcgr1	0.705381	1.27985	0.922616	1.09215	1.13575	0.868046	0.655358	0.361792	0.276512
Fcgr2b	1.69789	0.891772	0.601462	0.80888	0.455635	0.569844	0.932146	0.725709	0.25522
Fcgr3	0.434107	1.21177	1.4195	0.934625	0.582473	1.2795	0.832028	1.14182	0.881761

[truncated: 1 more sheets: Sheet12]
