# Supplementary material for: Negative feedback control of neuronal activity by microglia
Source: Springer Nature journal article supplement (doi:10.1038/s41586-020-2777-8), 2020-09-30
Supplement: MOESM17 [file 41586_2020_2777_MOESM17_ESM.xlsx]

## Sheet: ED6b
	Synchrony
		Control mice (n=7)			Microglia deficient mice (n=9)
Distance (um)		Mean	SEM	n (cell pairs)	Mean	SEM	n (cell pairs)
21.1403		0.0603404	0.0159253	50	0.121232	0.0259534	36
33.5052		0.0550762	0.00791664	193	0.0926841	0.010669	155
53.1021		0.0358222	0.00394343	401	0.0678158	0.00603035	350
84.1611		0.0347599	0.00265116	845	0.0558182	0.00378994	745
133.386		0.0310884	0.00177535	1636	0.0446233	0.00238746	1404
211.403		0.0317247	0.00127336	2865	0.0371797	0.00175962	2168
335.051		0.0305773	0.00118239	3187	0.0346885	0.00155662	2581
531.021		0.0281471	0.00238916	676	0.0236155	0.00282058	513

## Sheet: ED6c
	Average magnitude of Ca2+ event (per cell) in control (n=7 mice) and microglia deficient (n=9 mice) at baseline and in response to D1 agonist (SKF81297, 3mg/kg)
	Baseline				D1 agonist
	Control	Microglia Deficient			Control	Microglia Deficient
	3.66896	8.27771			4.20109	8.41072
	4.06489	5.05116			1.77642	0.350689
	2.42081	6.87751			1.69493	0.119634
	1.83255	3.53094			0.281775	2.42235
	2.48665	1.75902			1.67657	3.33836
	4.04832	5.07476			1.79223	7.58013
	2.08682	4.44654			2.39898	1.99693
	0.989197	0.222296			4.02418	4.58141
	1.0226	0.506486			9.96049	4.48897
	2.3448	2.71836			6.41967	1.00489
	2.71071	3.45039			0.791138	7.99594
	1.88303	2.56432			6.45057	4.90844
	2.4454	0.806646			0.569214	6.17706
	1.7306	0.989761			2.83074	1.50856
	2.02811	1.58696			6.67277	0.145536
	1.32621	2.4696			0.985456	0.2818
	1.27732	1.76301			7.43406	1.50609
	1.17438	2.9428			1.08903	0.905231
	2.4305	0.894033			3.22027	0.274437
	1.15497	2.01645			1.69664	1.15626
	3.22536	1.89562			0.548689	0.305579
	1.56275	1.40695			2.16865	1.48742
	1.22895	0.214891			1.06097	0.639178
	0.512959	0.358284			0.463949	0.262641
	1.66781	0.388633			3.96254	0.658936
	0.575714	0.36837			1.27622	0.343302
	4.44662	0.287406			0.428245	5.96033
	3.64704	1.60796			2.03209	0.563846
	3.53869	0.365283			0.902202	0.431713
	1.32609	5.70819			1.07839	0.291623
	11.9133	5.31955			0.807631	0.864466
	4.64606	1.86504			0.520229	0.785645
	2.29378	3.81265			1.00835	1.55831
	2.13078	0.703864			3.47814	1.91528
	5.43302	0.642987			1.76795	3.39771
	2.20294	4.24767			0.779893	0.498365
	5.46787	0.925284			0.343431	0.508391
	0.465018	0.814528			2.36886	1.29147
	1.92596	0.948775			1.97297	1.45093
	1.52652	0.374761			0.223298	0.5175
	4.43802	0.291559			0.736113	1.78231
	6.61981	1.17343			0.396095	0.764731
	0.938057	0.270974			1.00533	2.38017
	1.9534	0.35638			0.949033	0.343912
	1.40612	1.21092			3.38798	3.20462
	1.27287	0.442255			0.680334	0.6026
	1.27433	0.354025			1.17265	0.896471
	1.52111	0.504916			0.426262	0.390076
	1.10261	0.539181			4.45764	0.29487
	1.48342	0.600154			0.541843	0.549497
	1.13456	0.930638			4.34974	0.407701
	1.63431	0.368403			2.92481	0.460968
	0.917764	5.07606			1.20028	0.475765
	1.12544	14.2259			1.59708	0.893719
	1.01028	5.26394			2.20033	0.215522
	5.06411	3.82328			3.31496	0.367751
	2.73716	1.00257			0.762221	2.96575
	2.00376	1.05491			2.45393	9.33881
	1.28477	2.31299			2.22965	2.2644
	1.18421	2.82072			7.1724	7.45171
	0.819369	2.21294			0.676733	0.293208
	1.25636	3.10253			1.55181	9.9968
	1.64808	1.25038			5.50543	0.936114
	5.38676	1.70551			0.473999	0.724754
	6.75689	2.36688			2.40238	0.749464
	1.1374	2.55364			0.901617	0.189
	0.792382	1.69578			0.677331	1.52605
	4.08244	2.47425			2.09047	8.88329
	1.5825	2.34927			0.877539	3.05535
	2.23758	3.62457			0.800994	3.06633
	2.00176	2.15919			3.89818	0.960435
	1.52511	1.57238			2.28701	1.1283
	1.04887	0.955646			8.96437	3.5291
	3.0205	1.76331			5.2406	0.213021
	4.49085	2.05127			0.155276	4.96702
	1.12332	2.52633			3.8077	2.94757
	1.29391	2.41799			2.81471	0.310714
	0.975867	1.12129			1.42906	1.48923
	0.466338	1.2725			8.24199	1.95156
	2.37773	0.870757			0.79462	0.757194
	1.56436	0.423414			6.24674	1.8255
	1.88795	1.42825			3.12943	3.02986
	0.542462	0.561249			0.868575	2.01379
	0.691917	0.858332			2.30913	0.445745
	0.241506	1.40291			0.508195	3.60745
	0.886514	4.89916			3.61898	0.25961
	1.5747	1.00173			2.83603	0.289022
	0.7348	0.788764			0.530042	2.78522
	1.75791	0.78838			10.1111	0.425728
	2.21899	3.25463			3.57003	0.336195
	3.09478	1.18407			1.957	2.66249
	3.27855	5.19429			0.546318	0.58194
	5.48515	0.776974			2.95468	5.85731
	6.24051	1.19782			2.67482	0.416005
	16.7084	2.43548			0.404554	1.65926
	2.66363	1.46044			6.1662	0.689491
	4.78561	1.06107			0.481065	0.485069
	3.12618	0.45508			2.15402	2.15136
	1.52772	1.04402			1.52528	0.495915
	4.82926	7.0597			13.1925	0.302002
	2.93166	0.607785			0.226037	9.80275
	3.16506	1.36734			1.03831	1.99769
	4.85354	0.999449			1.24988	9.41181
	2.2591	0.290512			1.68879	4.92874
	3.41339	0.943869			1.77696	1.80319
	2.16872	2.75071			4.7805	2.02809
	1.41594	9.04238			0.395071	4.30244
	12.242	6.57119			0.392156	2.18676
	2.33065	4.96501			0.923202	0.39247
	1.647	5.71688			0.321405	4.18591
	1.99794	5.09772			1.2312	2.52709
	2.339	3.93377			2.36985	2.76988
	1.75467	2.52386			3.6094	4.4179
	5.25493	3.52487			3.90305	6.96807
	1.60524	2.89424			3.25759	3.00502
	2.40727	7.69781			2.63761	0.260296
	1.91313	1.97224			3.89062	0.899453
	1.26039	0.656876			1.54683	1.99928
	1.5418	0.532637			0.639371	3.30548
	2.0141	0.59104			3.22724	0.919981
	1.89829	4.38462			2.99501	0.353593
	3.56414	3.28264			1.38617	1.7972
	0.713155	2.46785			3.02583	0.472391
	2.01696	1.0928			4.5017	0.289351
	1.30992	1.91367			4.04331	0.15809
	2.61758	0.34853			1.49204	0.235265
	5.05827	0.550332			0.207275	4.07968
	5.39801	3.46051			0.680174	6.02687
	1.84899	1.04503			0.269944	0.237023
	1.89845	0.388231			1.84813	0.311933
	1.45342	2.59631			0.250032	0.822321
	4.41567	5.66263			0.450932	0.665412
	1.50506	3.03402			2.03608	1.36164
	2.17258	1.82479			0.912327	0.218636
	1.01065	3.56117			1.84253	0.245609
	2.25689	2.94821			0.216115	0.881903
	3.95001	2.96834			1.41227	1.45331
	1.51342	3.5901			1.00086	0.408262
	2.22957	0.700204			0.662224	1.90148
	1.43904	2.81273			1.98253	0.712991
	1.25829	6.82873			0.257395	0.886123
	2.10354	5.58601			0.86485	0.537324
	0.980875	2.1252			2.6646	0.224837
	1.63746	2.72666			0.792422	0.217834
	1.46186	3.15152			0.784769	0.409164
	2.14901	4.08948			2.06454	0.780021
	1.59691	3.91576			2.37223	1.09826
	1.30566	3.08358			0.443286	0.237849
	6.18424	2.87983			0.816098	0.384792
	2.8382	4.525			0.372525	0.192074
	1.15172	1.87877			0.949781	0.470847
	0.733836	3.88233			0.439489	0.97968
	1.27647	4.92758			0.922337	0.246114
	1.8787	2.10699			0.317106	0.414054
	4.89847	1.86761			0.47524	0.267365
	3.63709	1.23368			0.60746	0.34731
	3.20183	0.892531			0.401787	4.32328
	3.23552	1.08162			0.632683	2.71205
	1.99046	0.779448			0.747506	2.10086
	8.39197	0.678217			5.73017	2.34291
	1.23737	1.06227			5.05685	0.630588
	2.02061	1.13202			4.07053	2.76546
	1.10556	0.793839			4.04366	1.2088
	1.10078	1.43082			10.664	0.78995
	3.20008	2.80904			1.99495	1.25155
	1.57399	3.26948			2.1014	1.02252
	8.16971	1.55072			2.34422	0.47327
	2.61056	2.28125			3.19941	2.02303
	5.74351	2.58655			5.03578	1.81465
	5.86996	2.74467			2.91825	0.85605
	2.9429	1.21919			6.62157	0.452841
	3.52973	0.484155			5.78158	0.385169
	4.70367	4.52872			0.483415	0.192354
	2.39345	1.39395			0.879907	0.518269
	1.81678	1.89524			6.23955	0.347734
	2.4685	0.718198			3.80494	0.147132
	10.7396	1.55308			3.49848	0.499016
	1.60089	13.6944			2.64756	0.521566
	4.28078	0.82895			9.92814	5.8896
	3.44916	1.17724			4.7377	2.02586
	1.76791	2.83987			1.61759	1.72401
	4.15133	4.98698			8.41807	0.706604
	1.11454	4.0408			0.565723	0.662547
	2.70809	2.39634			11.4117	1.06058
	1.68188	3.03207			0.518221	1.22127
	2.89646	1.19008			2.01557	0.195459
	1.34286	3.06295			9.00419	0.697349
	2.11682	3.24659			2.41038	1.28613
	6.7498	0.544179			2.59254	0.703867
	0.802617	0.571983			2.3255	0.532805
	2.39271	0.404494			1.87434	0.453121
	0.882444	0.662342			0.980055	1.18176
	1.10489	8.27771			1.9238	0.242358
	1.36424	5.05116			0.796985	1.73647
	1.3222	6.87751			2.6271	1.42763
	1.93129	3.53094			4.28263	0.633495
	1.77305	1.75902			1.64163	1.30036
	1.31732	5.07476			6.88366	0.4289
	1.53729	4.44654			2.11578	0.654792
	1.09866	0.222296			3.05839	1.44591
	1.14824	0.506486			0.383751	5.6225
	2.05298	2.71836			2.94487	0.960793
	1.4321	3.45039			0.593888	2.29127
	2.84182	2.56432			1.19471	2.55628
	3.58396	0.806646			8.54388	2.9713
	3.21706	0.989761			2.24674	2.49764
	3.69787	1.58696			0.81544	1.84705
	1.47378	2.4696			0.638158	3.07524
	3.09294	1.76301			1.98979	2.33521
	3.59232	2.9428			1.13734	0.204654
	14.2316	0.894033			1.05271	6.00796
	4.52338	2.01645			2.3993	0.957876
	2.63579	1.89562			2.20557	3.36014
	1.92942	1.40695			1.49226	0.494004
	3.69812	0.214891			1.46085	2.55773
	1.50768	0.358284			1.52145	0.981361
	2.63748	0.388633			3.16115	0.567122
	1.63491	0.36837			6.26352	1.0088
	1.60985	0.287406			1.29807	4.83631
	0.810821	1.60796			1.03077	0.457577
	1.43647	0.365283			3.82674	0.255667
	1.29763	5.70819			1.36293	1.99621
	0.779802	5.31955			0.768803	1.12509
	0.998239	1.86504			5.50448	0.305194
	1.16914	3.81265			0.931465	8.41072
	1.41814	0.703864			0.930605	0.350689
	1.47583	0.642987			3.85195	0.119634
	3.1052	4.24767			1.1161	2.42235
	0.651309	0.925284			1.74703	3.33836
	0.627113	0.814528			1.67286	7.58013
	1.43165	0.948775			1.12751	1.99693
	3.92895	0.374761			1.94532	4.58141
	0.961377	0.291559			1.56591	4.48897
	1.13307	1.17343			6.41633	1.00489
	1.81981	0.270974			0.853571	7.99594
	1.06956	0.35638			1.07298	4.90844
	4.72561	1.21092			0.901004	6.17706
	1.37956	0.442255			1.36738	1.50856
	1.41683	0.354025			6.07308	0.145536
	1.45924	0.504916			1.45191	0.2818
	2.65059	0.539181			0.845506	1.50609
	0.646355	0.600154			1.43377	0.905231
	1.72784	0.930638			2.23658	0.274437
	1.186	0.368403			0.77657	1.15626
	2.21074	1.05491			2.20213	0.305579
	4.11532	2.31299			1.42653	1.48742
	7.48251	2.82072			2.33187	0.639178
	3.78023	2.21294			3.95365	0.262641
	6.48345	3.10253			1.57434	0.658936
	1.7103	1.25038			2.60176	0.343302
	3.96597	1.70551			0.826233	5.96033
	2.02373	2.36688			2.12004	0.563846
	4.74502	2.55364			0.545937	0.431713
	4.0201	1.69578			2.52228	0.291623
	2.77657	2.47425			1.09005	0.864466
	2.55317	2.34927			0.304348	0.785645
	6.43034	3.62457			0.842917	1.55831
	8.73667	2.15919			1.7106	1.91528
	2.39783	1.57238			1.47294	3.39771
	2.30361	0.955646			1.26394	0.498365
	1.56175	1.76331			0.340982	0.508391
	1.84601	2.05127			8.97657	1.29147
	1.91746	2.52633			2.63366	1.45093
	4.84359	2.41799			0.27977	0.5175
	1.23228	1.12129			0.247793	1.78231
	1.94692	1.2725			2.32367	0.764731
	2.14059	0.870757			2.18363	2.38017
	1.69789	0.423414			5.35	0.343912
	5.11752	1.42825			3.53529	3.20462
	4.89398	0.561249			2.95786	0.6026
	1.86636	0.858332			2.07626	0.896471
	3.18817	1.40291			0.121689	0.390076
	4.98486	4.89916			2.31258	0.29487
	2.42619	1.00173			1.20141	0.549497
	3.74349	0.788764			0.263307	0.407701
	0.682981	0.78838			1.20805	0.460968
	2.01285	3.25463			4.03461	0.475765
	9.29486	1.18407			1.72582	0.893719
	2.00967	5.19429			2.58645	0.215522
	3.29173	0.776974			1.20969	0.367751
	7.08662	1.19782			4.2516	2.96575
	8.27807	2.43548			1.18801	9.33881
	2.55499	1.46044			0.936593	2.2644
	3.22213	1.06107			1.87669	7.45171
	1.51026	0.45508			3.78642	0.293208
	2.02297	1.04402			0.366565	9.9968
	2.99111	7.0597			1.15364	0.936114
	3.90911	0.607785			0.835614	0.724754
	1.89832	1.36734			0.412462	0.749464
	2.53691	0.999449			1.72234	0.189
	1.85857	0.290512			0.533863	1.52605
	3.78527	0.943869			0.269071	8.88329
	2.54807	5.07606			1.00794	3.05535
	8.40397	14.2259			4.98585	3.06633
	2.25593	5.26394			5.69409	0.960435
	1.48458	3.82328			0.265045	1.1283
	1.71443	1.00257			2.40179	3.5291
	1.1055	2.75071			0.561269	0.213021
	2.38418	9.04238			0.226126	4.96702
	3.23779	6.57119			0.877992	2.94757
	2.35543	4.96501			0.468817	0.310714
	1.86701	5.71688			0.246929	1.48923
	4.2633	5.09772			0.175284	1.95156
	3.81198	3.93377			2.72824	0.757194
	1.31108	2.52386			4.65693	1.8255
	1.1908	3.52487			0.204542	3.02986
	0.77811	2.89424			1.07306	2.01379
	2.73139	7.69781			0.394651	0.445745
	1.95077	1.97224			0.181347	3.60745
	4.86912	0.656876			1.47577	0.25961
	3.36727	0.532637			2.41896	0.289022
	8.27771	0.59104			3.69141	2.78522
	5.05116	4.38462			2.37543	0.425728
	6.87751	3.28264			0.706136	0.336195
	3.53094	2.46785			2.90231	2.66249
	1.75902	1.0928			1.49122	0.58194
	5.07476	1.91367			0.51796	5.85731
	4.44654	0.34853			0.395129	0.416005
	0.222296	0.550332			2.08316	1.65926
	0.506486	3.46051			1.6771	0.689491
	2.71836	1.04503			0.472087	0.485069
	3.45039	0.388231			3.44904	2.15136
	2.56432	2.59631			0.653834	0.495915
	0.806646	1.11161			0.221293	0.302002
	0.989761	8.63692			0.254595	9.80275
	1.58696	1.10055			0.599521	1.99769
	2.4696	8.91176			1.20651	9.41181
	1.76301	1.5675			2.48966	4.92874
	2.9428	2.09332			0.200092	1.80319
	0.894033	1.39185			0.822429	2.02809
	2.01645	4.93698			0.23643	4.30244
	1.89562	2.31067			0.370395	2.18676
	1.40695	1.22751			2.61227	0.39247
	0.214891	3.50828			1.62743	4.18591
	0.358284	2.24693			1.33707	2.52709
	0.388633	4.02762			0.36113	2.76988
	0.36837	5.55797			0.365323	4.4179
	0.287406	2.36483			0.26591	6.96807
	1.60796	0.842635			0.851884	3.00502
	0.365283	5.73788			0.126749	0.260296
	5.70819	1.1907			0.712316	0.899453
	5.31955	2.35765			0.315357	1.99928
	1.86504	1.64058			0.944351	3.30548
	3.81265	4.67476			0.806946	0.919981
	0.703864	1.27983			3.20252	0.353593
	0.642987	0.75793			0.96777	1.7972
	4.24767	2.82321			2.73281	0.472391
	0.925284	4.25158			0.261692	0.289351
	0.814528	1.40566			0.619784	0.15809
	0.948775	1.50358			1.64091	0.235265
	0.374761	2.44983			0.999306	4.07968
	0.291559	0.81293			0.425604	6.02687
	1.17343	1.54598			0.949616	0.237023
	0.270974	0.622685			0.171965	0.311933
	0.35638	1.11161			0.400181	0.822321
	1.21092	8.63692			0.851745	0.665412
	0.442255	1.10055			0.199901	1.36164
	0.354025	8.91176			0.521917	0.218636
	0.504916	1.5675			0.298323	0.245609
	0.539181	2.09332			1.68473	0.881903
	0.600154	1.39185			8.41072	1.45331
	0.930638	4.93698			0.350689	0.408262
	0.368403	2.31067			0.119634	1.90148
	1.05491	1.22751			2.42235	0.712991
	2.31299	3.50828			3.33836	0.886123
	2.82072	2.24693			7.58013	0.537324
	2.21294	4.02762			1.99693	0.224837
	3.10253	5.55797			4.58141	0.217834
	1.25038	2.36483			4.48897	0.409164
	1.70551	0.842635			1.00489	0.780021
	2.36688	5.73788			7.99594	1.09826
	2.55364	1.1907			4.90844	0.237849
	1.69578	2.35765			6.17706	0.384792
	2.47425	1.64058			1.50856	0.192074
	2.34927	4.67476			0.145536	0.470847
	3.62457	1.27983			0.2818	0.97968
	2.15919	0.75793			1.50609	0.246114
	1.57238	2.82321			0.905231	0.414054
	0.955646	4.25158			0.274437	0.267365
	1.76331	1.40566			1.15626	0.34731
	2.05127	1.50358			0.305579	6.28443
	2.52633	2.44983			1.48742	4.85219
	2.41799	0.81293			0.639178	5.20751
	1.12129	1.54598			0.262641	1.11829
	1.2725	0.622685			0.658936	3.6748
	0.870757	1.54797			0.343302	2.90276
	0.423414	4.61052			5.96033	2.84494
	1.42825	4.22423			0.563846	3.65841
	0.561249	11.2187			0.431713	2.00651
	0.858332	5.3443			0.291623	4.60404
	1.40291	1.27554			0.864466	2.59441
	4.89916	2.83064			0.785645	2.65418
	1.00173	6.21667			1.55831	4.02463
	0.788764	3.61566			1.91528	3.1867
	0.78838	3.16272			3.39771	1.24024
	3.25463	2.15024			0.498365	2.17969
	1.18407	4.32234			0.508391	2.88279
	5.19429	6.64324			1.29147	0.238167
	0.776974	4.96804			1.45093	0.770359
	1.19782	1.91643			0.5175	2.30839
	2.43548	3.7543			1.78231	1.78801
	1.46044	2.06686			0.764731	5.7904
	1.06107	8.54094			2.38017	3.05071
	0.45508	0.885207			0.343912	1.10872
	1.04402	1.17897			3.20462	2.12472
	7.0597	3.66512			0.6026	0.852916
	0.607785	2.80639			0.896471	0.829138
	1.36734	1.66354			0.390076	6.85367
	0.999449	6.28968			0.29487	2.00156
	0.290512	5.32455			0.549497	0.71558
	0.943869	3.65023			0.407701	0.0749541
	5.07606	2.70461			0.460968	0.53738
	14.2259	2.09069			0.475765	0.328645
	5.26394	0.854817			0.893719	7.49348
	3.82328	10.0565			0.215522	0.218098
	1.00257	1.29898			0.367751	2.75629
	2.75071	0.818267			2.96575	1.53172
	9.04238	0.788721			9.33881	1.26224
	6.57119	2.12822			2.2644	1.54312
	4.96501	5.71889			7.45171	4.34102
	5.71688	1.78718			0.293208	1.6617
	5.09772	13.8217			9.9968	0.50924
	3.93377	3.12638			0.936114	0.969672
	2.52386	0.414704			0.724754	2.31728
	3.52487	1.52481			0.749464	0.591905
	2.89424	1.92611			0.189	8.18907
	7.69781	1.40414			1.52605	4.98649
	1.97224	1.05947			8.88329	4.28872
	0.656876	0.961449			3.05535	0.342508
	0.532637	1.53305			3.06633	7.58261
	0.59104	1.87965			0.960435	7.64743
	4.38462	0.313067			1.1283	0.743227
	3.28264	1.35454			3.5291	1.49482
	2.46785	7.24985			0.213021	1.38051
	1.0928	0.752218			4.96702	1.46415
	1.91367	0.915056			2.94757	4.39211
	0.34853	0.513795			0.310714	0.41763
	0.550332	6.30097			1.48923	2.39361
	3.46051	0.231873			1.95156	5.95758
	1.04503	1.18085			0.757194	1.41617
	0.388231	0.839677			1.8255	1.7714
	2.59631	0.555827			3.02986	0.496016
	10.5089	1.34643			2.01379	1.38386
	5.3154	0.351622			0.445745	1.41607
	1.77705	0.706998			3.60745	1.8763
	2.39961	1.82976			0.25961	0.994757
	5.34782	8.04044			0.289022	0.648467
	4.6345	0.328704			2.78522	2.76594
	3.93699	2.54534			0.425728	1.79188
	3.26935	1.92618			0.336195	1.0728
	4.94669	1.12203			2.66249	1.07985
	1.86206	1.29678			0.58194	0.469523
	0.817422	0.529742			5.85731	0.132609
	1.63268	1.1779			0.416005	0.16517
	0.996482	0.605329			1.65926	0.21834
	2.96122	1.8607			0.689491	5.83263
	1.1715	0.237803			0.485069	3.0625
	0.533323	1.1469			2.15136	3.47122
	1.19786	0.461182			0.495915	0.836275
	1.80214	0.441584			0.302002	0.783181
	0.823454	3.04889			9.80275	0.835025
	5.29367	6.28715			1.99769	1.34746
	6.67916	6.6386			9.41181	0.711621
	1.66007	3.68315			4.92874	0.881002
	6.36837	1.45586			1.80319	4.20774
	1.32457	6.07087			2.02809	0.718424
	4.94888	1.56172			4.30244	2.40515
	4.40432	2.09686			2.18676	0.216779
	2.54838	0.740783			0.39247	0.203473
	2.45136	3.31937			4.18591	1.12334
	2.14887	1.88508			2.52709	0.523316
	1.42361	1.56964			2.76988	1.07877
	1.7365	0.420749			4.4179	0.488589
	1.15759	4.6724			6.96807	0.166303
	0.944843	4.94632			3.00502	0.134608
	1.24868	2.42526			0.260296	1.86665
	0.774761	2.9233			0.899453	1.17113
	1.05017	2.61508			1.99928	2.36054
	0.801401	0.923857			3.30548	0.93385
	2.54503	2.02487			0.919981	0.310936
	0.884857	3.17991			0.353593	0.194032
	0.892753	9.05214			1.7972	1.53503
	5.244	1.07023			0.472391	0.719932
	2.04508	0.351243			0.289351	0.431154
	3.68363	2.50476			0.15809	0.255028
	5.20644	1.0399			0.235265	2.6609
	2.84501	0.568647			4.07968	2.0338
	3.99151	0.736927			6.02687	0.164314
	4.10785	0.900136			0.237023	1.65935
	4.31508	1.08658			0.311933	4.22239
	0.81705	1.59034			0.822321	0.97585
	0.771148	0.931099			0.665412	0.329158
	0.999311	1.07297			1.36164	1.42933
	0.359435	3.62199			0.218636	0.894091
	8.49239	1.17179			0.245609	0.294693
	0.879749	0.827777			0.881903	8.63177
	3.70053	1.45752			1.45331	0.551195
	5.90161	9.10616			0.408262	0.4849
	9.09781	7.25403			1.90148	0.133945
	4.25289	3.36754			0.712991	0.140653
	4.69562	3.34998			0.886123	1.07306
	1.17893	1.28209			0.537324	1.01664
	1.19812	1.45479			0.224837	1.12437
	0.494864	1.92083			0.217834	0.735653
	0.661097	1.35664			0.409164	0.547776
	2.25284	1.7077			0.780021	2.19471
	1.03357	5.9189			1.09826	5.89007
	0.821959	2.27358			0.237849	0.634156
	1.17087	0.738023			0.384792	0.937334
	0.880089	0.715747			0.192074	1.13626
	1.30139	0.796187			0.470847	0.723085
	2.92401	4.30595			0.97968	1.35432
	3.70067	1.13861			0.246114	0.4399
	3.88013	1.04613			0.414054	0.374945
	4.17664	1.82152			0.267365	0.220544
	4.25223	1.65059			0.34731	0.207475
	6.38372	1.35977			2.63982	7.33628
	7.41383	0.903172			4.72792	4.40026
	2.63797	1.43998			4.262	1.24389
	2.49995	0.534509			5.85377	3.0578
	5.21692	1.49936			2.1512	1.41094
	1.59854	0.773505			2.02988	7.30072
	2.22085	1.76933			1.14473	1.64297
	2.35419	1.91541			1.06779	7.8233
	2.75611	1.11374			1.66673	1.24837
	3.45159	0.665683			0.93543	0.210226
	0.878501	4.91944			6.70898	3.71748
	2.06847	0.919128			0.623278	0.792859
	4.39324	1.51484			0.397833	1.09803
	3.3359	0.870813			1.61093	0.32782
	6.02702	0.978621			1.91304	0.401232
	2.1756	3.9389			2.77774	0.709979
	0.974486	4.17168			2.39483	1.41617
	1.03884	3.78605			0.592166	1.0992
	2.64057	1.91715			1.91316	1.59369
	1.39817	1.77028			2.48478	0.751786
	2.32986	2.37123			1.74968	1.2977
	1.29153	3.9271			0.612245	0.448728
	1.07518	3.47583			0.917024	0.526881
	0.720401	2.6885			0.430513	1.19966
	0.935757	6.03417			0.422127	0.788829
	1.79599	0.464307			2.18161	1.07943
	1.38303	1.56593			0.830841	1.72705
	0.547022	0.616575			1.82846	3.57441
	2.70917	1.34182			0.882375	0.566731
	1.079	0.698541			0.387523	0.660709
	4.66863	0.613132			4.31533	0.452518
	2.45998	0.948839			0.952018	1.6359
	1.43311	1.69693			0.622631	2.17138
	2.81134	7.02198			4.87268	2.77782
	1.84175	2.34196			2.86199	0.84949
	0.897463	0.939053			4.7429	0.820646
	6.66615	2.28796			1.04483	1.26875
	4.77672	2.21581			10.827	2.40281
	0.234871	1.56237			2.67325	0.258197
	0.770926	0.91179			2.83949	0.264764
	0.95225	0.470775			5.62931	0.600646
	1.358	1.04169			3.21032	0.938785
	0.987085	0.35442			1.32842	3.0151
	1.49482	1.26929			1.99261	1.7611
	1.37199	0.584278			2.071	3.99601
	1.59519	0.774563			2.69188	2.27012
	1.09365	1.81671			0.588097	1.25125
	0.483183	3.19574			5.96664	2.26863
	1.17719	1.42138			2.25214	1.00105
	2.32784	0.71418			0.437165	3.46736
	0.208029	1.8432			1.00637	4.03513
	1.09475	3.30246			3.64946	0.334915
	1.5885	2.30495			6.70964	1.00329
	0.822337	0.561355			4.82283	0.781682
	1.09604	4.91403			1.9466	3.32498
	1.30205	4.10704			1.3771	8.43428
	1.74535	2.52871			1.13436	3.01337
	4.067	1.81735			1.20532	0.383114
	5.94845	1.3688			5.75543	1.17504
	2.93482	1.96376			1.50327	0.690257
	2.29187	1.19714			1.83759	1.33027
	0.956125	1.44294			6.11406	1.95931
	0.836918	0.606385			1.59583	0.401069
	1.87509	0.234425			1.48164	0.859549
	1.03766	5.77288			1.43233	1.64221
	0.561056	1.16032			4.07873	0.341659
	1.4858	0.377421			0.506065	0.775528
	3.94577	0.833874			0.883408	7.25942
	1.75052	0.523002			2.95826	2.53036
	1.17316	0.694196			1.27625	2.34763
	0.921704	1.31445			3.32159	0.720078
	1.72602	0.145476			0.464957	0.422393
	0.403647	0.346211			1.14955	0.663454
	0.985837	0.493084			4.87994	0.181506
	2.12928	0.26499			3.28776	0.281001
	0.44746	0.358554			1.68823	0.872046
	1.45192	1.39849			1.94165	2.5874
	1.20556	2.17067			0.563488	0.67455
	0.532653	2.5157			5.36509	2.17742
	0.263567	1.45022			6.70102	1.59218
	0.301842	1.58135			5.20242	2.74812
	1.024	0.784917			5.65416	0.367092
	1.41518	1.09648			0.510886	0.480713
	0.668033	0.322831			3.10933	0.456438
	0.369755	0.415532			4.13316	0.303529
	0.662019	0.255788			1.20837	4.89589
	0.746945	0.381142			2.91958	1.17548
	1.0078	0.587683			1.16693	2.15893
	2.1479	0.160263			5.54648	3.32038
	0.638524	0.160635			1.79963	1.15048
	0.799348	1.22675			4.12472	3.15125
	4.65799	0.249572			1.58248	2.38265
	1.34897	0.579225			0.536663	4.04837
	2.8974	4.01917			1.09914	2.53279
	0.451323	1.43103			0.764488	5.09554
	0.895107	2.07835			1.50015	0.9006
	1.43195	2.97295			1.01407	1.99282
	2.34426	3.66444			1.69898	2.22742
	1.31187	1.96403			0.301978	1.43453
	0.920904	3.78318			0.615339	1.36054
	0.350604	0.939407			1.54864	1.92709
	0.999454	1.62862			0.557192	2.04724
	1.24908	0.453652			2.13765	0.876868
	0.534797	0.695708			0.601691	2.03962
	1.45054	0.55989			1.26289	4.07006
	3.13429	0.27517			0.554312	1.5338
	0.680469	2.48303			2.28874	1.53886
	0.943904	0.938833			2.8545	5.23293
	3.71203	0.808484			1.7547	0.861462
	2.74921	0.428738			2.34707	5.47502
	2.0003	0.25341			0.65888	4.4976
	0.827385	0.317759			2.00017	2.75088
	0.499493	0.437007			3.56508	1.51736
	5.4963	0.605075			3.9676	4.00568
	0.449573	0.314062			2.30947	2.36403
	0.679304	0.873185			0.31732	1.40321
	0.735981	0.283889			0.290079	1.09199
	0.691881	0.40626			1.35889	2.57206
	0.394843	5.27673			0.856744	0.533733
	0.794107	3.75815			3.26826	0.64726
	0.709932	5.33304			2.12764	1.45083
	0.649901	2.33072			1.05547	3.45417
	1.27932	3.44962			0.81948	2.13656
	6.28516	3.05738			1.36597	0.966828
	1.94346	1.80091			5.41796	0.696117
	5.46137	4.71761			0.550903	0.714168
	1.56249	3.75101			0.440915	0.980407
	2.15839	6.18989			0.944361	5.26217
	0.281501	6.42757			0.56326	0.683981
	0.8083	1.41938			1.4891	0.978935
	2.25305	1.3099			0.7986	1.94215
	1.69952	4.58108			0.40271	1.05769
	0.906163	4.34501			1.10388	1.87948
	4.52716	0.855027			0.362266	3.77791
	4.044	1.56152			2.12154	4.04827
	1.31597	1.67188			0.573464	5.11135
	0.30697	2.38053			1.25778	4.16263
	0.495381	8.30644			1.18711	2.72648
	0.385745	1.78227			0.716421	1.734
	0.369755	1.35223			1.24803	0.478148
	0.417759	2.5498			0.939712	1.4134
	1.2453	0.743681			0.928649	1.47794
	1.02257	2.94517			0.805079	0.809475
	0.652661	3.61531			4.47266	2.75122
	0.505654	1.17288			2.3151	0.618711
	5.21328	1.94456			3.17791	3.94342
	6.03479	1.08645			0.356021	1.41463
	4.18498	2.88604			6.19108	0.830681
	1.38361	3.04404			0.425328	0.451648
	4.07273	0.404138			5.54697	4.13512
	0.83878	1.516			1.01563	6.43981
	3.87166	1.92369			2.6763	3.82331
	2.82984	0.723191			0.433931	1.68335
	0.433344	2.95403			0.586578	0.738282
	1.19669	3.75059			0.486243	2.25872
	1.92366	1.75486			2.19086	1.69664
	1.34548	1.34024			0.501738	0.808549
	3.59848	2.812			1.33916	2.29807
	2.32337	2.28778			1.87161	0.718151
	0.415187	3.69796			2.18533	1.46073
	1.2642	2.76314			3.67701	2.07307
	2.80438	2.41968			2.95826	0.845323
	1.87979	6.96748			3.59659	1.32146
	1.04251	5.00696			1.36926	1.72864
	0.867807	2.07222			7.27182	3.18802
	0.994908	3.30971			1.77684	2.81553
	0.341265	1.20571			0.472248	1.84048
	2.15382	1.84215			2.71369	1.92592
	1.32225	3.06643			0.376589	1.19262
	0.396724	0.907603			1.36573	2.60339
	0.594221	2.30681			1.29552	3.44205
	1.34315	3.08846			0.510664	3.28983
	1.57884	2.95739			0.385101	0.557371
	2.74418	1.44774			0.569811	1.0486
	1.23732	5.51704			1.13113	0.399643
	4.6152	4.23744			0.868285	0.635909
	0.486632	0.539788			1.10668	4.31762
	0.577119	1.27993			1.94915	1.56013
	0.505992	3.32829			1.15827	1.01776
	0.283144	0.86755			0.3047	2.66238
	0.288062	1.69708			0.317996	2.1435
	1.02289	6.90056			2.67268	0.450599
	1.0183	2.86159			6.44486	3.63187
	0.750392	1.34644			2.2869	2.31319
	1.02149	2.70449			3.18341	1.90998
	0.556916	0.90776			2.69617	1.19119
	4.43213	6.63648			2.27492	0.882144
	2.54437	2.26921			2.23383	0.751408
	1.83586	2.84437			1.4191	0.459926
	1.22589	1.28617			3.86473	0.60095
	2.61484	0.780239			1.62795	0.697797
	0.570497	2.24958			0.46272	0.832174
	4.06062	7.9958			0.350115	0.570298
	1.788	3.32863			0.4	1.58883
	2.31226	0.379641			1.89049	0.487655
	3.54983	0.706331			0.684986	0.677552
	0.716042	0.369535			0.351135	0.873741
	5.26224	2.35646			0.359422	0.588932
	0.34802	2.54143			1.17527	0.543904
	1.75373	1.22087			3.16868	1.07646
	0.34052	1.172			1.19876	0.563931
	6.37489	0.602689			0.404117	2.42449
	1.4398	1.87402			0.302628	0.656532
	1.27623	0.765414			0.52315	1.02659
	4.60184	5.16904			5.40801	0.382643
	2.14432	2.72569			0.389743	0.452562
	1.05298	5.4326			0.244626	1.04161
	2.26779	2.34335			0.396595	2.18275
	2.20482	3.0714			1.21828	0.812208
	2.38174	2.41974			0.457889	6.04781
	0.879545	5.25889			1.67132	1.04456
	2.09274	2.19449			0.529081	3.82988
	0.589523	3.42673			2.67749	0.521911
	1.53137	1.38669			0.260147	0.162977
	1.71546	2.48932			0.515772	0.504772
	1.81831	3.20264			2.77937	0.527289
	2.87495	2.96611			2.3389	1.40963
	0.613008	1.19186			3.37159	0.921014
	0.285788	1.65246			0.257834	4.17521
	3.94012	5.32709			1.96956	1.10021
	1.42726	5.90992			1.21647	0.502506
	0.220084	0.885635			4.51186	0.844475
	4.744	1.74903			2.75457	1.32567
	1.90807	2.03546			7.84695	0.847424
	3.09285	0.862985			1.1291	0.22808
	0.972585	0.332792			0.180029	0.577834
	2.48331	1.35475			3.04348	0.840206
	0.448384	3.03955			1.3182	0.450448
	0.832424	3.15304			0.59773	0.433653
	0.684261	2.48029			0.33488	2.87043
	2.03	1.82402			2.05145	1.92448
	0.953649	1.75616			0.342786	0.675453
	1.25148	1.03078			1.43073	0.728504
	2.16075	1.49142			0.917743	0.817155
	3.52452	5.8062			1.72123	0.458976
	2.68612	3.12623			0.567688	0.260833
	2.78917	1.09772			8.46432	0.741806
	1.80836	2.84681			1.58027	0.406869
	3.37204	2.79474			2.43494	0.181603
	0.56353	0.469952			0.483137	0.967442
	3.18156	0.343226			5.24053	0.399972
	1.58476	2.03118			6.56703	0.861945
	3.27357	2.7979			1.7302	1.70418
	2.16948	4.8862			0.76019	0.944226
	1.12356	3.23841			3.49867	0.241852
	1.65353	3.99514			0.356823	0.26573
	8.57953	1.7727			0.339129	0.160406
	4.55439	1.90487			1.56821	0.301531
	2.587	2.68527			2.57818	2.00577
	6.02449	1.40028			2.47306	1.4256
	2.24329	1.53163			0.84594	1.1828
	1.89741	1.56889			1.04318	0.151242
	0.745774	0.553071			0.374798	1.65832
	1.81235	0.675627			1.7225	3.15464
	1.31691	4.88908			0.407886	1.24119
	1.15928	2.88029			0.871336	0.988851
	0.435086	0.25926			2.87246	0.648456
	0.399109	1.58806			3.7032	0.505851
	3.84024	4.61869			0.492649	0.136018
	2.69227	5.83687			0.758267	3.5196
	0.569334	2.2721			0.379317	0.225084
	1.06969	0.730881			0.291725	0.287476
	1.79176	1.23013			0.723706	0.329285
	2.01327	1.42853			0.756093	1.74561
	1.9274	0.313213			1.40008	1.29453
	0.524202	0.387544			0.436104	1.20217
	0.492585	0.761268			3.57182	0.521599
	0.34452	2.1039			8.74593	2.54938
	1.28044	4.7135			3.04504	0.606728
	1.71399	3.12287			1.86649	1.07374
	1.37242	2.5438			1.33754	0.355624
	1.42579	3.13318			2.0961	0.206137
	0.525258	5.61978			2.04311	1.71584
	8.41484	2.38287			2.07916	0.311628
	6.80784	0.793817			6.18242	0.216355
	4.90894	2.7628			0.869345	0.87415
	3.06808	0.940314			2.68008	2.0022
	2.93034	0.618779			1.21641	0.335178
	4.83416	3.38176			0.448023	0.347375
	2.03595	0.670756			0.744733	2.93023
	1.89648	0.592663			1.16992	0.373821
	0.704523	0.261589			5.33474	0.307451
	1.66787	0.487214			0.697452	0.356759
	2.10462	1.44444			0.59724	5.33517
	1.02598	5.69008			1.59385	5.453
	1.75898	3.25213			1.81362	6.1035
	2.60036	1.09014			1.06965	0.446473
	2.11112	1.43123			1.37787	2.96158
	0.612542	0.419485			0.499557	4.48678
	2.82546	5.1288			1.23387	9.53013
	2.08969	1.59787			0.785033	5.00761
	0.562053	1.17652			6.54899	5.85922
	0.724229	2.04683			0.999068	5.13153
	0.85158	4.36561			0.998283	2.66062
	1.85379	1.53905			0.261541	1.23396
		1.98636			5.1419	8.61624
		4.06272			0.761792	0.33958
		4.46499			0.879496	0.285692
		2.97651			3.56431	1.14644
		0.591098			0.350474	1.71698
					0.537889	1.34892
					0.509332	0.359087
					2.12287	2.22138
					0.925686	4.29746
					0.384468	0.499853
					1.20504	0.454449
					2.29285	3.0968
					0.322855	0.326013
					0.275114	0.737586
					0.583121	5.07697
					0.727584	0.584003
					3.84159	5.57681
					0.588204	0.303294
					0.367741	0.460897
					1.2987	0.512099
					1.0402	0.365611
					1.91259	6.28541
					0.343009	2.2719
					1.82022	3.03051
					4.22012	8.99358
					1.35217	2.65636
					1.51064	2.10526
					4.76085	1.09281
					1.58314	1.8523
					0.570483	2.0247
					0.542274	0.806896
					1.45061	0.953545
					1.72895	0.299272
					0.269825	4.3523
					1.16589	2.81568
					0.924588	2.66411
					1.40068	3.81157
					2.11264	0.266432
					1.26526	0.553114
					1.61988	1.28704
					0.658107	2.26366
					0.337544	0.514023
					0.950764	2.00589
					0.62642	0.33529
					0.269118	0.568716
					8.18278	0.432116
					1.85004	0.297494
					1.21298	5.4028
					0.926353	0.892811
					3.93928	0.738035
					1.60419	1.05519
					1.16858	0.812641
					2.79251	0.663536
					0.504964	4.70797
					0.253327	3.51594
					1.38474	2.2273
					3.76479	5.04052
					0.341949	5.78403
					0.207594	7.90684
					0.238183	0.305759
					0.64274	2.99893
					0.373353	5.84695
					1.1294	0.799213
					2.58014	0.767306
					0.461003	5.6245
					0.249551	0.184345
					1.22043	1.95322
					1.53281	2.35869
					0.587349	1.15464
					0.552272	3.13024
					0.57026	5.46657
					6.81191	0.533365
					2.05868	1.38803
					2.42581	6.46168
					0.984155	5.68364
					2.3478	0.601573
					0.535667	4.53764
					1.22151	1.62398
					2.19659	1.89547
					1.5811	4.04674
					0.308787	5.94771
					0.384423	6.2437
					0.60229	2.61327
					0.68567	1.64727
					1.94815	6.14359
					0.167419	8.91169
					2.44665	5.32342
					0.624967	1.5717
					0.412436	9.15484
					0.156866	3.78984
					2.41835	5.83515
					0.341564	1.27743
					1.31603	3.44506
					0.24003	1.23518
					0.40403	0.700937
					0.965327	4.81004
					0.663421	5.53518
					0.293605	2.27826
					0.288606	5.59293
					0.47141	1.3129
					0.17731	1.91665
					1.30697	1.47244
					0.406297	1.94672
					0.707092	1.47425
					0.382852	1.6723
					0.48474	2.74198
					0.24225	4.17726
					0.14024	7.07877
					0.735153	2.23668
					0.603727	1.46318
					0.270022	1.30072
					1.55238	1.76496
					2.69826	3.90905
					0.335457	1.35144
					3.27282	2.86825
					1.12544	6.11509
					0.952478	4.70642
					2.03616	3.79537
					7.00318	7.15233
					4.91552	0.684336
					1.44298	2.77496
					0.194583	9.86547
					0.645064	2.23099
					2.52717	1.86793
					0.27343	1.10709
					2.81741	2.3107
					1.62017	4.71943
					0.696143	2.95525
					3.31616	1.79596
					1.45792	2.26253
					0.908233	4.8998
					1.63537	2.04564
					1.80214	4.98548
					0.315987	4.34873
					0.439383	0.936824
					0.233545	3.40628
					4.93065	3.13086
					0.19715	2.44832
					0.244	1.01309
					2.27547	2.22133
					2.62821	2.13435
					1.53066	0.742633
					1.09673	2.85901
					0.940023	1.28416
					0.464762	0.248651
					0.304994	5.1216
					0.497775	0.341419
					0.144129	0.94583
					0.74454	9.63482
					0.452839	0.298803
					6.17645	2.23406
					0.869632	0.753147
					2.30677	1.42154
					1.56952	0.752844
					0.241591	0.271871
					0.51287	1.31772
					4.94052	0.406934
					4.62077	0.292903
					1.60809	2.20514
					6.27564	2.96513
					4.2519	1.45775
					2.48176	1.90311
					0.152235	2.79562
					1.6333	6.61866
					1.93463	3.54527
					0.942209	0.841051
					0.212943	0.857833
					6.44832	0.180261
					1.83637	3.37398
					1.62841	8.72072
					0.99695	2.12866
					1.53117	2.24617
					4.67591	0.285851
					1.37302	1.26451
					6.97823	0.663788
					1.64036	0.78776
					1.18807	0.256432
					0.804763	0.998978
					1.87637	1.89109
					6.11035	1.75829
					1.4042	2.92903
					0.264995	0.347791
					0.998058	1.4669
					1.18963	1.29251
					3.98509	0.2644
					0.626818	5.19794
					0.744671	0.449955
					0.741712	0.350952
					0.606643	0.950765
					1.02594	1.10892
					0.421122	2.02515
					5.74039	3.53569
					1.5793	2.66076
					0.343922	3.59937
					0.343922	1.13022
						2.50411
						2.63552
						2.02784
						3.9645
						1.82249
						4.7022
						1.68806
						0.518064
						1.82864
						0.75516
						3.0694
						1.05414
						0.24279
						0.343791
						0.88383
						1.09085
						1.02535
						0.972408
						1.46267
						0.597548
						0.606287
						0.646637
						0.700908
						0.599569
						0.375166
						0.68142
						0.68142

## Sheet: ED6d
Average frequency of Ca2+ events per neuron per minute per mouse in control and microglia deficient mice in response to coadministration of D1 agonist (SKF81297, 3mg/kg) and A1R agonist (CPA, 0.1mg/kg)
	Control (n=7 mice)	Microglia Deficient (n=9 mice)
	0.765657	1.47222
	1.62414	1.28298
	1.56667	1.65227
	0.985374	0.888525
	1.86744	2.47812
	2.56774	1.28222
	0.92	0.718182
		1.68696
		1.20833

## Sheet: ED6e
	Average magnitude of Ca2+ event (per cell) in control (n=7 mice) and microglia deficient (n=9 mice) at in response to co administration of D1 agonist (SKF81297, 3mg/kg) and A1R agonist (CPA, 0.1mg/kg)
	Control	Microglia Deficient
	4.60295	4.31429
	1.67519	2.63759
	2.85006	8.32844
	0.511062	2.33718
	0.664183	4.76805
	0.705042	1.70589
	1.35965	0.83849
	3.27711	6.07515
	1.48335	1.17566
	1.07278	0.727106
	3.01347	2.10346
	0.395237	1.55569
	1.97929	1.08787
	0.710402	0.45095
	1.51164	0.477465
	10.3828	4.1641
	0.38028	1.2611
	0.797587	0.479746
	6.56134	1.54081
	0.888541	6.92799
	1.8059	2.10106
	1.10236	0.755246
	2.02639	0.967931
	3.22593	0.690243
	3.03988	0.68929
	6.3577	0.685011
	2.22589	1.28024
	4.0436	0.448955
	5.01015	1.4133
	9.94568	1.02322
	1.78151	0.778819
	5.78458	0.328769
	13.9539	0.621441
	3.71312	0.429025
	6.79757	4.0652
	2.44274	4.36051
	3.81862	3.63143
	2.29152	2.67062
	1.70602	5.92025
	4.60548	1.35912
	5.04241	1.92278
	6.38313	5.7873
	1.83014	2.21547
	7.17419	1.80158
	3.52955	1.88891
	1.36408	0.411913
	2.86379	0.612081
	4.00171	1.28502
	6.0296	2.38135
	2.0462	2.47042
	1.30746	1.49022
	3.01205	0.411796
	2.73585	3.17122
	1.49629	2.34976
	1.52913	1.88704
	5.96668	4.31429
	5.44024	2.63759
	3.6346	8.32844
	2.27187	2.33718
	2.58696	4.76805
	1.65073	1.70589
	1.37742	0.83849
	2.7407	6.07515
	28.8845	1.17566
	1.77562	0.727106
	9.22976	2.10346
	2.31834	1.55569
	28.8892	1.08787
	1.56031	0.45095
	2.61064	0.477465
	3.93579	4.1641
	3.66687	1.2611
	5.34674	0.479746
	1.77566	1.54081
	3.46509	6.92799
	5.7556	2.10106
	5.02849	0.755246
	1.04714	0.967931
	1.67741	0.690243
	1.5709	0.68929
	1.56417	0.685011
	2.76922	1.28024
	1.57038	0.448955
	1.21439	1.4133
	1.57553	1.02322
	0.781841	0.778819
	1.10398	0.328769
	1.95382	0.621441
	1.32659	0.429025
	3.07614	11.5423
	0.928663	2.89996
	1.57934	4.28948
	5.2742	4.66124
	1.53827	1.44975
	1.93826	8.27847
	1.62878	2.23399
	1.89521	3.78715
	1.84496	1.38042
	1.13605	7.28735
	2.70123	4.53764
	3.73318	0.978159
	2.85378	3.93582
	4.62863	1.93342
	2.59415	4.89853
	2.27065	2.42161
	0.961339	4.14357
	0.745652	2.13757
	4.82436	0.906025
	2.02765	0.590848
	1.10772	0.402372
	1.15775	0.256256
	1.82536	2.70057
	2.58589	2.90391
	2.22367	1.46433
	1.58043	1.8424
	1.63712	2.09503
	2.13901	1.18736
	0.881885	0.933025
	1.63535	0.737488
	2.89404	0.769503
	4.31429	1.13074
	2.63759	2.67851
	8.32844	0.327058
	2.33718	0.673196
	4.76805	5.65113
	1.70589	2.36807
	0.83849	1.90737
	6.07515	0.568603
	1.17566	0.964008
	0.727106	2.79232
	2.10346	1.16639
	1.55569	0.822786
	1.08787	1.03071
	0.45095	5.22998
	0.477465	1.28598
	4.1641	1.59686
	1.2611	2.25221
	0.479746	0.661819
	1.54081	4.51666
	6.92799	4.95061
	2.10106	1.9992
	0.755246	4.29169
	0.967931	0.361632
	0.690243	4.50706
	0.68929	1.686
	0.685011	2.98833
	1.28024	8.9004
	0.448955	1.12315
	1.4133	2.82947
	1.02322	1.72279
	0.778819	2.64457
	0.328769	1.00837
	0.621441	0.526922
	0.429025	1.69767
	0.9	5.81777
	1.4	2.47454
	1.5	4.25469
	0.7	1.17976
	1.7	2.80147
	1.7	3.82152
	0.5	0.702811
	0.6	2.90993
	0.5	2.85556
	0.5	0.502337
	1.1	2.86891
	1.4	0.614695
	2	1.03185
	0.7	6.23729
	2.3	2.4261
	0.5	1.01708
	0.6	0.960768
	0.6	3.05113
	2.7	2.00723
	0.6	0.824376
	1.2	0.8536
	0.8	0.449652
	0.1	4.3182
	0.7	0.984934
	1.3	1.5013
	1.5	1.37097
	1.9	1.69885
	0.7	0.457217
	1.1	5.66905
	1.1	1.79505
	0.4	1.6474
	1.3	0.591712
	3.1	4.29541
	1.5	0.522366
	1.1	1.7942
	1.4	0.612998
	1.4	0.446716
	1.2	0.634523
	0.4	0.181678
	0.3	0.32741
	4.94772	0.127952
	3.53625	0.539505
	7.17772	0.494641
	3.77134	1.4264
	5.14863	0.857756
	10.2794	0.555007
	3.62985	1.08156
	6.07679	0.463872
	2.97484	1.78095
	0.870594	0.455023
	3.22332	0.693179
	0.739252	0.561479
	0.672748	2.80584
	3.70688	1.81232
	0.837924	0.457323
	0.2309	2.24267
	1.081	0.39938
	8.53518	1.65687
	1.61533	1.47728
	2.70667	0.804532
	1.62355	3.13423
	1.49544	0.359523
	1.66526	0.462636
	0.773233	0.483881
	0.659209	0.457687
	1.20423	2.14979
	0.269882	3.92304
	0.77427	5.44244
	4.1292	4.19945
	1.14435	6.16953
	3.42884	3.47543
	1.41559	3.89338
	1.46287	3.53622
	2.81483	4.94711
	2.72275	3.90884
	2.91984	3.79242
	0.966157	2.54742
	1.93856	1.60353
	0.292104	2.5693
	2.57421	3.59731
	0.438645	2.02997
	0.435878	2.51767
	1.91355	4.70148
	0.664779	2.13895
	0.620974	0.590103
	1.03428	0.630805
	0.509844	1.81865
	0.575286	2.80406
	0.383605	0.926064
	0.349609	0.732636
	0.306061	0.723291
	0.248283	0.887828
	2.50352	1.13707
	0.672945	0.406899
	0.65602	0.948517
	0.619465	0.338736
	0.337272	2.92935
	1.46815	0.3867
	0.585279	1.64555
	0.230619	3.72733
	0.669955	5.74921
	1.58495	2.01463
	0.809959	3.97438
	1.50675	7.07836
	0.535899	2.23531
	0.409245	1.82751
	0.609576	1.57386
	5.57614	0.238611
	2.15329	0.935119
	2.89857	6.12483
	1.22816	0.670603
	1.85414	0.776286
	2.5657	1.8053
	2.00343	1.9493
	1.02295	0.804301
	1.72276	0.396092
	2.12596	0.979216
	2.41021	0.710106
	1.82739	3.09011
	0.796771	3.73116
	1.0276	1.0364
	1.14453	2.90785
	1.08335	1.56768
	1.9074	1.7973
	0.860156	2.23575
	2.8349	5.40246
	0.438774	0.82829
	0.750639	3.19551
	1.11059	1.9485
	2.30471	1.32442
	1.87315	0.300937
	1.07718	2.26882
	1.50655	3.52434
	0.73575	1.08739
	0.451715	1.92907
	1.61264	0.284671
	2.07294	0.484611
	2.73906	2.03606
	1.08684	3.74693
	0.725498	1.48727
	1.81071	0.825813
	1.027	2.01311
	0.448209	0.863496
	0.789914	0.41501
	0.66817	0.511783
	0.639153	0.319166
	5.46806	1.18252
	0.305712	0.789547
	4.55551	0.389045
	3.44278	0.268963
	2.37398	0.646441
	0.616905
	3.57846
	1.70291
	0.551006
	1.09692
	1.72635
	0.553201
	0.892739
	0.789431
	0.381168
	1.23232
	6.47269
	1.67136
	1.2
	2.96667
	2.9
	1.83333
	2.3
	0.466667
	1.6
	1.2
	0.466667
	1.86667
	0.9
	1.36667
	1.33333
	0.8
	1.83333
	1.2
	0.533333
	0.3
	0.566667
	1.4
	0.6
	1.46667
	2.06667
	0.666667
	1.53333
	2.63333
	1.3
	0.8
	0.966667
	0.666667
	1.43333
	0.966667
	1.26667
	2.26667
	1.6
	0.7
	5.00214
	6.29089
	2.86888
	3.83519
	1.72598
	1.11496
	2.37383
	2.02044
	0.535194
	3.31095
	0.861774
	0.542258
	1.70867
	1.32477
	2.42861
	1.46043
	1.66314
	1.06105
	0.947324
	0.40644
	2.31922
	2.72421
	1.11934
	1.82879
	0.965899
	0.758768
	2.53836
	0.329107
	0.221043
	2.19828
	2.18155
	2.22214
	0.679678

## Sheet: ED6f
	Cross correlations between neurons at baseline, in response to D1 agonist (SKF81297, 3mg/kg) and in response to co adminsitration of D1 agonist and A1R agonist (CPA, 0.1mg/kg), plotted as a function of interneuronal distance
		Control (n=7 mice)
		Baseline			D1 agonist			D1 agonist + A1R agonist
Distance (um)		Mean	SEM	N (cell pairs)	Mean	SEM	N (cell pairs)	Mean	SEM	N (cell pairs)
21.1403		0.321315	0.0280588	51	0.20423	0.0328903	74	0.289852	0.0548666	21
33.5052		0.218562	0.0147254	205	0.153104	0.0124119	282	0.197261	0.0229563	78
53.1021		0.143631	0.00844895	427	0.120471	0.00739046	594	0.119138	0.0143854	173
84.1611		0.128431	0.00563977	884	0.106521	0.00456357	1337	0.117249	0.00930041	410
133.386		0.114742	0.00381435	1743	0.106778	0.00338365	2598	0.108946	0.00630772	824
211.403		0.108775	0.00280792	3030	0.090937	0.00243612	4392	0.0948487	0.00449487	1357
335.051		0.110501	0.00267125	3383	0.0813364	0.00220999	5415	0.0938633	0.00393227	1862
531.021		0.0994398	0.0057333	724	0.063195	0.00598186	781	0.0822325	0.00755581	417
		Microglia Deficient (n=9 mice)
		Baseline			D1 agonist			D1 agonist + A1R agonist
Distance (um)		Mean	SEM	N (cell pairs)	Mean	SEM	N (cell pairs)	Mean	SEM	N (cell pairs)
21.1403		0.483109	0.0543985	30	0.37152	0.0415212	45	0.362851	0.0800583	11
33.5052		0.306914	0.019321	141	0.224468	0.0150811	241	0.205048	0.0224438	84
53.1021		0.231555	0.0121557	326	0.16979	0.00936215	484	0.206175	0.0164222	160
84.1611		0.192507	0.00799248	682	0.148164	0.00550071	1057	0.170442	0.0114337	371
133.386		0.175626	0.00558916	1315	0.128354	0.00394805	1979	0.16514	0.00759192	695
211.403		0.16348	0.00445323	1986	0.111758	0.0029975	3090	0.152343	0.00590396	1035
335.051		0.136195	0.00385683	2398	0.0900053	0.00247043	3785	0.134731	0.00539362	1266
531.021		0.0926731	0.00796403	489	0.0933176	0.00533569	830	0.118733	0.0105214	285

## Sheet: ED6g
	Frequency of Ca2+ events per neuron per minute in control and microglia deficient mice
				Control Mice (n=7 mice)							Microglia Deficient Mice (n=9 mice)
				Baseline	D1 agonist			D1 agonist + A1R agonist			Baseline	D1 agonist			D1 agonist + A1R agonist
					10 min	20 min	30 min					10 min	20 min	30 min
				0.8	0	0	0	0.9			0.2	0.1	0.2	0.1	0.233333
				0.8	0.5	0.5	0.6	1.4			1	1.2	0.3	0.1	0.433333
				2.4	1.3	1.4	1.3	1.5			0.2	0.8	2.6	0.1	1.9
				1.2	0.1	0.3	0.5	0.7			0.3	2.4	1.6	1.5	1.73333
				0.4	0.7	0.3	0.5	1.7			1.8	3.7	2.1	1.6	0.366667
				1.5	1.5	1.7	1.5	1.7			0.4	0.2	0.5	0.1	2.6
				1.9	1.1	1.1	1.1	0.5			0.2	0.6	1.4	0.7	2.2
				0.4	1.4	1.1	0.8	0.6			1.9	0.2	0.5	0.6	0.466667
				2.1	2.2	0.7	0.8	0.5			0.6	0.1	1.4	1.3	2.13333
				1.9	0.6	0.4	0.4	0.5			0.7	2.4	3.3	2.1	1.26667
				1.2	0.9	0.7	0.9	1.1			0.3	2.4	1.3	0.7	4.06667
				1.4	1.7	1.1	0.8	1.4			0.4	0.9	0.6	0.1	2.4
				1.3	1.5	1.4	1.3	2			0.6	0.2	1.1	5.9	1.8
				1.4	1.1	0.9	0.7	0.7			1.4	0.7	0.7	1.6	0
				1.3	0.1	0.2	0.2	2.3			2.8	4	0.6	0.6	2.16667
				0.8	1.2	0.7	0.9	0.5			0.5	3.4	0.5	0.9	0.3
				0.7	1.1	0.8	0.8	0.6			0.2	1.2	1.1	0.9	1.7
				0.3	0.7	0.4	0.7	0.6			0.2	0.8	1.2	1.1	1.5
				1.1	2.3	0.3	0.4	2.7			0.7	2.7	1.2	1.3	0.166667
				0.5	1.4	1.3	1.2	0.6			0.8	0.8	0.9	0.6	2.23333
				2.1	0.8	0.8	0.8	1.2			3.4	6.1	0.6	0.6	2.1
				1.1	2.5	1.5	1.8	0.8			0.8	3.2	2.7	0.9	2.23333
				1.5	0.2	1.5	0.4	0.1			4	3	0.6	0.5	1.76667
				1.3	0.9	0.9	1.1	0.7			3.6	3.8	0.1	4.7	1.33333
				2.2	0.2	0.1	1.2	1.3			1.8	1.6	0.8	1	0.233333
				3.1	1.2	1.6	1	1.5			0.6	4.6	2.9	1.3	2.03333
				1	1.7	1.6	1.8	1.9			2.1	0.4	3.5	5.7	1.16667
				0.9	1.1	0.5	0.6	0.7			0.7	2.1	1.7	1.5	1.63333
				1.1	0	0	0	1.1			2.5	1.2	0.9	0.6	0.833333
				0.9	0.5	0.7	1.1	1.1			0.3	3.8	3.6	3.2	0.0666667
				1.3	1.1	1.8	1.3	0.4			0.1	1.7	2	0.9	0.933333
				0.4	1.2	1.3	1	1.3			1.4	1.3	1.5	4.7	0.133333
				0.6	2.1	0.2	0.5	3.1			0.2	1.2	1.3	1	2.23333
				1.1	3	0.5	0.6	1.5			0.8	1.4	1.1	0.9	0.1
				1	0.3	0.3	0.5	1.1			2.1	1.4	0.8	0.6	0.8
				2.2	1.4	0.9	1.3	1.4			0.1	3.5	4.4	3.1	0.6
				0.5	1.7	2	0.9	1.4			1.7	3	1	0.5	1.83333
				0.9	1	1.2	0.9	1.2			1.5	1.8	1.1	0.9	0.4
				1.7	1.2	1	0.9	0.4			1.6	1.3	1.4	1.3	1.76667
				0.9	0.1	0.7	0.3	0.3			2.9	2.2	2.5	1.3	0.8
				0.6	0.6	0.8	0.4	0.766667			3.9	5.8	2.5	2	0.2
				1.2	1.9	1.7	0.3	0.266667			0.7	3	0.7	0.7	2.06667
				0.6	0.7	0.7	0.9	0.933333			2.6	0.7	0.3	1.5	1.4
				0.5	0	0.9	1.4	2.63333			6.1	3.3	0.8	2	1.26667
				0.8	0.5	1.4	1.8	1			2.7	0.9	1	2.8	0.1
				2.6	1.3	1.5	1.4	0.2			3.3	0.6	0.8	1.7	0.766667
				1.2	0.1	0.7	0.8	0			1.5	2.6	4.6	3.7	0.533333
				0.8	0.7	1.7	1.2	2.03333			1.5	2.4	2	1.4	0.866667
				0.8	1.5	1.7	1.8	1.26667			2.1	4.1	2.7	1.1	0.1
				1.1	1.1	0.5	0.8	1.13333			2.7	7.1	5.3	2.7	0.366667
				0.4	1.4	0.6	0.7	1.9			1.8	2.3	3.2	1.4	0.0333333
				0.3	2.2	0.5	0.4	4.26667			1.9	4.8	2.7	2	1.83333
				2	0.6	0.5	0.2	1.03333			1.5	3.2	2.5	1.7	0.2
				1.4	0.9	1.1	1.7	0.833333			1.1	0.9	1.2	0.9	0.433333
				1.6	1.7	1.4	1.1	0.466667			0.2	11.6	0.1	1	0.0333333
				1.3	1.5	2	2.6	1.66667			0.7	2.8	2.2	1.2	0.2
				0.8	1.1	0.7	1.9	1.83333			1.8	0.3	0.6	1.1	0.266667
				2.8	0.1	2.3	1.7	0.533333			0.7	0.1	4.3	0.2	1.06667
				1.1	1.2	0.5	0.6	0.1			0.3	1.9	3	2.2	2
				1.6	1.1	0.6	0.4	2.6			0.5	0.7	0.9	0.9	0.166667
				1.4	0.7	0.6	0.9	2.56667			1	4.7	0.1	0.1	0.6
				0.4	2.3	2.7	1.5	0.5			0.3	0.3	1.1	0.7	0.366667
				1.1	1.4	0.6	0.7	3.6			0.7	1.2	1.4	2.6	0.433333
				1	0.8	1.2	1.3	1.5			0.6	2.9	5.4	3.4	0.6
				1.2	2.5	0.8	1.1	2.2			1.1	0.5	0.6	0.7	2.33333
				1	0.2	0.1	0.1	1.23333			0.5	2.8	0.9	0.7	0.9
				0.5	0.9	0.7	0.4	3.26667			1.6	0.2	0.3	0.1	1.7
				0.7	0.2	1.3	0.9	2.8			0.4	0.2	0.1	0.2	1.7
				1.8	1.2	1.5	2.1	3.96667			1.8	2.7	2	1.6	1.6
				0.7	1.7	1.9	2.1	2.4			0.1	2.4	1.7	0.6	0.3
				1.1	1.1	0.7	1.1	0.466667			1.2	6.9	2.8	2	2.66667
				3	0	1.1	1.6	1.1			1.8	0.9	1.2	0.7	0.8
				0.6	0.5	1.1	0.4	0.966667			1.2	0.1	0.2	0.2	0.5
				2	1.1	0.4	0.4	1.46667			1.8	5.9	1	1.7	1.16667
				1.3	1.2	1.3	1.2	1.13333			1.4	0.7	1.1	0.5	1.7
				1	2.1	3.1	2.1	1.1			1	0.1	0.1	0.9	3.6
				0.4	3	1.5	0.9	1.1			1.4	2.2	1.9	0.6	2.06667
				1.1	0.3	1.1	1.6	0.466667			2	1.6	1.6	1.4	0.433333
				1	1.4	1.4	0.5	1.56667			2.4	1.9	1.5	1.5	0.133333
				1	1.7	1.4	1.3	3.26667			1.8	0.8	1	0.7	2.03333
				1	1	1.2	0.8	2.53333			1.6	0.4	4.7	3.2	1.76667
				0.9	1.2	0.4	0.4	1.33333			1	0.5	0.9	0.5	0.5
				0.6	0.1	0.3	0.7	2.06667			2.3	0.7	0.8	0.5	1.43333
				1.3	0.6	0.2	0.1	3.2			1.5	2.3	0.8	0.5	0.133333
				1.6	1.9	5	3.5	2.2			2.2	0.1	0.3	0.2	1.2
				0.6	0.7	1.6	1.4	1.6			1.2	0.2	0.9	0.8	0.133333
				0.8	0.2	0.1	0.3	0.266667			0.9	3.3	0.7	0.7	2.23333
				0.5	4.2	0.3	0.4	0.466667			0.7	0.9	0.5	0.8	0.7
				0.8	1.7	0.9	1.2	1.5			0.8	2.2	2.1	1.1	1.5
				1.2	0.1	0.8	3.1	2.13333			0.7	3.5	2.7	0.1	0.433333
				1.5	0.2	1	0.4	2.13333			0.7	3.1	2.6	1.9	1.5
				1.4	1.2	0.4	1.2	3.13333			0.3	2.1	3.2	1.2	5.3
				0.3	4.2	0.3	1.5	0.833333			1.9	0.1	0.3	0.2	3.63333
				1	0.7	0.3	0.9	1			1.1	3.1	1.2	2.7	0.533333
				1.8	0.9	1	1.7	0.166667			1.1	0.7	2.5	3.5	0.733333
				0	0.8	0.8	0.8	1.03333			0.8	0.6	3.8	2.6	2.4
				0.8	0.2	0.1	0.2	1.66667			1.9	5.7	3.1	3.8	2.33333
				1.3	0.6	0.1	0.3	1.03333			1.4	0.3	0.4	1	0.966667
				0.5	0.9	1.5	2.5	0.866667			1.4	4.4	3.1	2.5	3.8
				2	0.1	1.1	1.3	1.23333			1.6	3.8	2.4	1.9	1.66667
				1.2	4.4	0.5	0.8	0.833333			1.7	0.4	0.4	0.2	0.266667
				2.2	1.8	5.3	2.2	0.2			2.2	1.6	1.4	1	1.7
				1.7	2.2	0.7	0.5	0.466667			0.8	0.3	4.4	0.1	1.6
				1.9	0.3	2.1	2.7	0.1			2.9	0.9	1.1	1.1	0.3
				0.3	0.3	2.1	2	0.966667			2	0.7	1.2	1.3	2.66667
				1.6	0.4	0.2	0.4	0.466667			3.2	3.6	2.9	1.8	0.8
				0.8	1.8	0.9	1.5	1.23333			0.5	0.7	0.4	0.2	0.5
				0.7	2.1	0.2	0.4	0.966667			0.3	2.2	1.4	1	1.16667
				0.3	3.8	1	1.6	0.233333			0.3	1.9	0.7	1.4	1.7
				1.3	0.4	1.2	0.4	0.333333			0.2	1.9	2.3	2.1	3.6
				1.7	0.5	0.6	0.8	1.1			0.1	4.3	3.1	1.7	2.06667
				1.8	1.2	2.3	2.5	0.866667			0.1	2	2.5	1.5	0.433333
				1.3	0.1	3.7	0.1	0.833333			0.1	1.2	0.9	1.2	0.133333
				1.2	1.1	1.5	1.4	0.8			0.5	0.1	2.5	0.1	2.03333
				2.1	2.6	0.3	0.3	0.533333			1.9	5.6	3.4	2.8	1.76667
				1.2	6.2	2.4	0.2	0.933333			0.4	1.1	1	1	0.5
				1.4	1.5	1.4	0.7	0.5			2	1.9	0.7	0.9	1.43333
				0.7	3.1	0.6	1.3	0.4			1	0.6	0.6	1.6	0.133333
				1.5	7	1.2	1.5	2.33333			1.5	0.4	0.5	0.6	1.2
				1.1	1.3	0.1	0.8	2.06667			5.1	0.9	0.7	0.7	0.133333
				0.4	0.7	0.2	0.3	1.8			0.9	1.3	1.9	1.2	2.23333
				1.4	3	0.1	0.2	1.3			1.2	0.3	2.3	0.3	0.7
				1.3	0.4	0.2	0.2	1.1			0.1	4.3	0.9	0.5	1.5
				1.3	0.3	0.4	1.1	1.46667			0.7	8	0.4	1.8	0.433333
				1	1.9	1.3	1	0.2			0.3	3.5	4.9	0.1	1.5
				2	2.1	1	0.3	0.233333			2.2	4.7	5.8	0.7	5.3
				1.6	3	1.1	0.6	1.73333			4.6	1.1	0.7	0.6	3.63333
				0.3	0.1	1	0.8	0.933333			0.7	0.2	4.4	0.2	0.533333
				0.3	0.7	1.8	1	0.533333			1.6	7.1	1.5	0.8	0.733333
				0.7	0.6	3.1	1.9	0.3			1.3	9.7	6	2.1	2.4
				0.8	1	1.2	2.3	0.6			0.1	1.6	2.5	1.7	2.33333
				1.2	1	1.3	1.6	0.7			0.3	6	5.4	0.6	0.966667
				1	2.5	1.9	1.6	0.133333			1	1.7	1.1	0.6	3.8
				0.8	0.8	1.8	0.7	0.633333			1.2	7	0.4	0.5	1.66667
				0.9	1.2	1.3	0.8	0.0333333			0.8	2.6	0.2	0.1	0.266667
				3.7	1.8	1.5	1.1	1.9			0.6	1	0.7	1.7	0.433333
				3	0.8	0.4	0.2	0.0333333			0.7	7.6	3	2.6	0.466667
				1.5	2.1	0.6	0.8	1.5			1	3.1	3.6	3.9	0.366667
				2.6	1.4	1.2	0.8	1.3			1.4	1.9	1.3	0.7	3.96667
				1.6	0.2	1.5	0.9	0.566667			1.1	0.4	5.7	0.1	1.73333
				2.4	2	2.9	3.3	0.566667			0.1	2.4	2.3	2.1	0.233333
				0.8	3.8	1.5	1.9	0.333333			1.1	2.8	3.6	2.5	1.13333
				4.3	1.2	1.5	2.1	0.3			0.5	4.1	3.4	0.7	1.2
				2.6	1.2	1.6	1.2	0.366667			1.2	5.2	5.4	1.1	1.63333
				3.1	2.1	2.5	1	0.866667			0.6	2.7	2.3	0.5	1.13333
				0.8	0.7	0.7	0.6	0.233333			0.5	1.1	0.8	0.9	1.2
				0.8	2.9	2.9	3.8	1.56667			0.5	2.1	2.3	2.1	0.966667
				4.1	0.6	4	2.9	1.2			0.3	1.1	2.2	2.4	2.56667
				2.7	0.7	1.3	2.1	1.13333			0.5	1.3	2.6	0.8	3.43333
				1.5	2.4	2.6	2.9	1.23333			0.4	1.4	1.1	1.6	0.366667
				3.5	3.3	2.6	1.1	0.766667			0.4	1.7	1.7	1.5	0.666667
				0.9	1.7	1.7	2.1	0.833333			0.8	1.2	0.9	0.4	0.9
				0.4	3.2	1.1	1.3	1.5			0.3	1.9	0.4	0.4	2.03333
				3.9	2.8	1.3	1.5	1			0.3	5	1.4	3.3	0.933333
				1.8	2.5	1.8	2.6	2.2			0.8	2.6	3.2	2.9	0.9
				5	3	3.1	0.3	1.3			0.2	3.9	5.3	1.2	1.16667
				0.7	0.8	1	2.1	1.76667			0.6	1.7	1.4	1.4	2.2
				2.2	1.8	4.7	1.8	2.06667			0.5	1.8	1.8	1.8	0.8
				1.5	4.6	1.4	2.8	0.433333			1	2.6	1.9	1.9	0.333333
				3.8	2.4	0.5	1	1.53333			0.5	1.7	1.3	1.3	0.7
				1.4	5	2.7	1.4	1			0.2	2	1.7	1.7	0.7
				1.9	1.6	0.3	0.5	0.433333			1.1	0.3	0.6	0.6	1.9
				3.3	0.3	3	2.7	1.83333			1.4	2.5	1.2	1.2	1.2
				1.4	1.3	1.3	2.9	0.4			0.4	2.1	1.4	1.4	0.366667
				2.3	1	1.5	2.1	1.23333			1.1	1.7	2	2	0.666667
				2.8	1.3	1.6	1.7	1.2			0.8	1	0.5	0.5	2.2
				3.1	3	0.1	3.1	0.766667			0.3	2.2	2.1	2.1	2.43333
				2.4	1.4	1.9	1.9	1.46667			0.9	1.1	1.5	1.5	1.03333
				3.1	1.7	1.1	0.8	1.2			1.3	0.5	0.6	0.6	1.7
				0.9	0.1	1.5	2.3	0.4			0.4	1.9	2.6	2.6	1.03333
				4.1	1.1	2.4	1.6	0.133333			1	2.1	2.2	2.2	1.7
				3.2	0.7	1.8	2.4	0.5			0.3	2.2	0.1	0.1	0.7
				0.5	2.1	2.8	1.6	1.4			0.8	2	1.4	1.4	1.36667
				1.5	1.8	0.6	0.8	0.566667			1	1.7	0.9	0.9	1.13333
				0.9	0.5	1.9	1.5	1.46667			0.7	0.3	0.4	0.4	0.133333
				0.5	1.7	1.3	1.2	1.8			0.6	0.6	0.7	0.7	1.86667
				0.6	0.6	1.3	1	0.633333			1.1	4.7	0.9	0.9	3
				3.4	1.2	1.1	1.2	1.56667			0.8	2.5	2	2	2.26667
				1.8	4.7	0.1	0.6	2.43333			0.8	1	3	3	0.866667
				1	4.5	0.7	2.4	1.13333			0.9	2.6	2.4	2.4	0.333333
				1.3	1	4.1	3.8	0.433333			0.7	0.6	0.3	0.3	0.366667
				1.4	0.9	3.3	2.4	0.866667			1	1.4	1.2	1.2	1.16667
				1.2	1.2	2.8	4.3	0.566667			0.7	0.3	1.9	1.9	0.2
				2.8	4.3	0.5	1.3	1.56667			0.6	0.7	1.8	1.8	0.5
				2.3	2.9	1.2	0.4	0.833333			0.4	0.2	0.2	0.2	1.63333
				1.3	2.9	1.1	2.1	1.16667			0.4	1.2	1.4	1.4	1.13333
				1.3	1.3	2.6	1.6	2.2			0.9	2.3	1.8	1.8	2.13333
				0.6	0.5	0.5	0.8	1.43333			0.6	2.8	2.4	2.4	1.46667
				0.3	2.2	4.6	1.7	0.6			0.5	2.6	2.4	2.4	1.76667
				1.2	1.8	2.1	2.9	0.5			1.3	2.8	2.2	2.2	0.933333
				2.2	0.4	2.5	3	0.333333			1.1	1	1.1	1.1	0.833333
				5.7	3.8	1.4	3	1.16667			1.4	0.9	0.7	0.7	1.6
				2	2.1	2.9	2.9	2.53333			1.2	1.3	1.1	1.1	1
				4.1	1.4	1	2.1	1.76667			1.2	3.9	3.1	3.1	1.66667
				2.3	2.1	1.7	1.2	1.73333			0.8	0.9	1.2	1.2	0.533333
				4.7	4.4	2.7	2.9	1.5			1.2	0.7	0.7	0.7	1.86667
				3.5	3.5	5.9	1.9	4.53333			0.3	2.5	2.6	2.6	0.766667
				2.5	0.8	3.8	2.8	0.466667			0.5	2.3	2.4	2.4	1.73333
				3.8	2.1	2.1	2.5	2.4			1	2	1	1	0.333333
				2.5	0.2	0.7	0.8	1.3			0.8	0.4	1.3	1.3	2.76667
				1.7	4.7	0.7	1.7	1.1			1.3	2.2	0.7	0.7	0.233333
				1.2	3.8	0.3	0.9	0.833333			0.4	0.4	1	1	2.06667
				1.6	0.7	0.8	0.9	1.86667			1.2	1.6	1.5	1.5	0.333333
				1.3	1.6	0.2	0.2	1.8			0.6	2.4	2.8	2.8	1.36667
				1.4	0.6	0.8	1.2	0.8			1.3	1	0.8	0.8	1.16667
				0.9	0.9	2.1	2.2	4.66667			0.6	0.6	3.1	3.1	0.766667
				3.9	0.6	0.7	1.1	1.73333			0.6	2.4	1.8	1.8	2.13333
				0.7	1.2	3.2	2.8	1.96667			0.5	0.6	0.8	0.8	1.1
				1.3	2.7	2.1	1.9	2.33333			0.9	1.2	0.2	0.2	2.56667
				3.3	0.8	3	2.4	0.5			1	1.8	3.1	3.1	0.4
				0.9	1.9	1.4	1.2	0.366667			1.8	3.6	2.3	2.3	2.23333
				1.5	3.1	2.7	3.9	1.96667			0.9	2.8	1.3	1.3	0.666667
				0.9	1.9	2	2.1	1.33333			0.4	0.3	2.7	2.7	1.73333
				0.9	1.1	0.7	2.3	2.46667			0.2	1.6	1.3	1.3	1.9
				2.4	1.4	0.7	0.6	2.26667			0.2	0.5	0.9	0.9	1.2
				0.6	1.9	1.2	1.2	3.23333			0.5	2.5	1.8	1.8	0.8
				2	2.1	0.6	0.4	3.26667			0.6	2.4	1.4	1.4	4.9
				0.9	0.6	3.6	3.5	0.833333			0.2	1.4	1.5	1.5	2.3
				1.4	0.9	0.2	0.3	1.46667			1.1	1	2.3	2.3	3.16667
				2.3	0.2	2.4	2.2	2.3			1.5	0.9	0.8	0.9	0.533333
				0.6	3.2	2.1	2.9	1.83333			1.6	0.1	0.1	0.1	2.4
				2.6	0.8	3.9	2.7	3.23333			0.4	2.9	2	1.5	0.933333
				1.8	2.3	2.4	3.9	0.933333			1.6	1.3	1.8	1.7	1.23333
				1.2	2.6	3	3	1.9			1.1	2.7	2.5	1.9	3.33333
				1.5	4.5	0.6	0	2.26667			1.1	2.5	2	1.5	1.53333
				1.8	2.4	4.5	3.7	3.26667			1.4	1.1	0.9	1	2.43333
				1.4	4.6	5.9	3.6	1.5			0.1	2.3	2.4	1.7	1.03333
				3.1	4.6	0.7	1.6	1.5			0.6	1.6	1.6	1.2	1.03333
				5.1	3.5	2.2	2.2	1.4			0.6	3.5	2.1	2.5	1.46667
				1.2	3.7	2.7	2	1.66667			0.7	2.4	2.6	2.3	1.9
				2.2	4.7	1.5	1.2	2.8			1.2	3.6	3	2.2	0.933333
				2.9	4.2	3.8	2.1	1.2			1.3	3.6	1.9	2	0.733333
				2.1	1.2	0.588235	3.5	0.166667			0.8	1.6	2	1.4	2.5
				3.7	1.4	0.705882	1.3	0.966667			0.3	5.5	0.4	0.3	2.43333
				4.8	4	1.17647	0.9	2.33333			1.6	2.4	1.9	2	2
				2.5	0.7	0.705882	2.4	0.8			0.7	1.7	1.6	1.2	2.23333
				0.8	1	0.470588	0.4	2.63333			1.7	3.6	3	1.4	2.46667
				3.7	1.7	1.29412	3.2	0.6			0.7	2.4	2.4	1.6	1.2
				1.4	1.5	1.05882	1.2	1.2			0.2	2.5	1.7	1.2	1.26667
				1	1.2	0.235294	1.9	1.6			0.8	2.8	1.8	1.2	2.36667
				1.7	2.4	0.470588	1.5	1.73333			2	1	0.3	0.5	2.93333
				1.3	2.6	1.52941	1.1	3.26667			0.2	0.6	3	0.9	0.6
				1.5	0.9	1.52941	0.4	2.8			0.7	0.8	1.6	1.3	1.56667
				0.7	0.3	2	1.2	2.36667			0.6	1.5	2.3	1.4
				0.9	0.5	2.58824	0.8	0.933333			0.3	2.1	2.3	1.7
				2.4	0.5	0.941176	1.4	0.533333			0.8	0.2	3.6	2.7
				2.2	2.9	0.470588	2.6	0.566667			0.4	0.6	2.5	1.4
				2.3	1.2	0.470588	1.7	5.16667			0.8	2.2	1.3	1.2
				4.4	0.7	0.117647	1.9	3.26667			0.9	2.8	2	3.5
				3	0.3	0.352941	0.7	1.1			0.4	2.6	1	1
				2.1	1.1	3.2	2.5	1.7			0.7	3.3	3.2	2.7
				1.2	0.1	1.6	0.7	1.13333			0.8	3.1	2.1	1.7
				3.9	0.3	1.2	1.4	1.76667			0.3	2.6	1.6	1.4
				4.5	1.3	1.7	2.3	1.03333			0.7	2.7	2.8	1.2
				2.9	1.2	1	0.7	1.66667			0.6	1.2	1.4	1.1
				1.6	1.8	0.1	1.3	2.63333			1.1	0.2	0.2	0.8
				0.9	1.8	0.2	1.4	2.43333			0.4	1.5	1.4	1.5
				1.4	1	2	1.7	1.93333			0.1	4.1	2.6	0.3
				1.3	3.2	1.5	2.1	1.7			1	2.7	0.5	1.3
				3.2	0.2	0.2	0.9	1.6			1.1	2.5	2	1.3
				3.2	1.4	5.7	0.9	1.43333			0.3	1	1.9	0.5
				2.3	1.5	1	1.1	1.3			0.5	0.2	0.2	0.7
				0.3	6.6	0.8	0.3	1			0.7	3.3	2.2	1.7
				3.4	3.4	1.3	1.9	1.36667			1	4	3.1	2.4
				1.3	4.4	4.4	1.9	0.566667			1.2	1.1	0.9	0.9
				0.7	1.7	0.3	1.3	0.733333			2.2	3.6	2.4	1.7
				1.3	1.1	0.5	1.1	1.7			1.4	2.8	1.3	4.4
				0.8	1.3	1.4	0.6	3.06667			0.8	3.3	1.4	0.2
				0.9	0.6	2.9	0.8	1.33333			0.4	3	3.1	2.5
				1.3	0.4	2.1	0.6	0.6			1.8	3.6	3.5	0.7
				2	1.9	4.7	0.6	3.23333			1.6	4.3	2.7	1.9
				1.2	1.8	3.2	0.6	1.96667			2.6	6.2	0.3	3.2
				1.7	6.1	2.6	1.5	0.9			1.6	1.8	2.2	1.4
				1.5	3.7	1.4	1.1	2.9			1.4	3.2	3.7	2
				4.4	5.7	1.3	0.6	0.366667			0.1	1.9	2.1	1.9
				0.5	2.6	2.3	0.7	2.2			1.1	1.9	2.1	2.9
				2.2	2.4	3.3	1.6	3.5			2.3	2.5	3.3	3.1
				1.4	1.8	1.2	2.4	5.9			0.5	3.4	2.8	2.3
				3.6	1.8	1.2	0.4	5.66667			2.6	2.3	2.4	1.9
				1.6	0.4	3.1	0.6	1.76667			2	0.6	0.7	0.5
				1.9	1.4	0.1	1.5	1.13333			2.7	3.6	2.7	2.1
				0.9	1.6	3.3	0.2	1.73333			0.3	4	2.2	2.4
				1.3	3.7	2.3	1	1.86667			1.5	2	2.4	1.7
				0.9	0.3	1.3	1.5	2.36667			1.4	0.4	1.4	0.4
				1.9	4.6	0.8	1.1	3.6			2.6	0.3	1.2	0.3
				3.6	2	2	1.1	1.33333			0.7	0.9	1.3	1.3
				4.4	0.7	0.8	1.8	1.53333			0.6	3.2	3.6	2.1
				1.9	0.8	0.3	1.4	2.76667			4.1	0.2	0.4	0.1
				2.4	1.3	1.3	0.2	2.3			1.2	3.4	3.1	2.7
				0.7	0.7	2.3	0.3	2.23333			1	3.3	4.2	0.3
				3	0.3	0.8	1.4	4.33333			1.7	1.2	1.6	0.8
				0.4	1.2	0.4	0.7	2			1.6	0.6	1	0.7
				0.9	1.5	0.4	2.7	1.2			1	2.2	2.4	1.7
				0.5	0.2	1.9	1.1	1.23333			1.3	1.7	1.4	1.3
				1.6	0.4	0.6	0.8	0.266667			1	3.5	5.1	4.8
				0.8	0.6	2.2	0.8	1.16667			0.6	2.9	2.8	2.8
				0.6	1	2.5	0.8	0.8			1.5	3.7	2.9	3.7
				1.9	0.5	1.8	1.6	0.733333			0.7	0.6	3.5	0.1
				2.1	2	2	0.6	0.633333			0.2	0.6	0.7	1.3
				2	1.6	1.6	1.5	0.933333			1.7	1.7	2	3.1
				1.9	1.4	1.8	0.4	1.43333			0.5	0.5	2.5	0.8
				0.8	0.7	0.7	1.3	0.433333			0.3	3.8	3.8	2.3
				1.4	0.7	0.6	0.3	0.8			0.5	0.7	0.7	0.4
				0.9	2.2	1.6	1.4	0.366667			1.6	1.3	1.1	2
				0.3	0.6	0.7	1.1	1.53333			1	3.6	2.9	2.3
				1.3	0.6	1.1	0.9	0.766667			0.8	0.2	0.2	2.6
				0.9	0.9	0.2	0.8	2.56667			0.3	3.5	3.7	2.6
				2	0.5	1.1	1.2	1.66667			2.5	2.1	3	1.8
				0.7	1.3	2.3	0.9	1.23333			0.2	4	3.7	2.4
				0.9	6.6	0.6	1.1	0.3			1	0.7	1.6	0.4
				2.1	1.1	1.2	0.8	0.666667			0.4	3.3	2.4	2.5
				2.3	2.5	0.6	2.4	0.733333			1.5	3.8	2.8	2.6
				0	0.6	0.2	0.9	1.13333			4.2	3.1	2.7	2.2
				2.1	1	1.6	1.7	1.2			0.2	0.2	0.5	0.1
				1.4	0.5	0.8	5.2	0.666667			0.1	3.6	3.1	1.4
				1.5	0.1	1.1	0.9	1.63333			1	2.8	5.5	0.6
				0.5	1.7	1.3	0.7	0.2			1.6	0.8	1.5	1.2
				3.3	0.5	1	0.9	0.533333			0.7	3.2	2.1	2.7
				2.6	1	0.8	0.7	0.7			1.8	4.6	4	3.2
				1.5	0.8	0.2	0.6	0.133333			3.2	2.2	3.6	2
				0.8	0.9	0.4	1.3	1.2			1.6	2	2.8	4.4
				0.7	0.6	0.3	1.2	1.86667			2.2	4	4.9	1.2
				5.6	0.6	1.2	1.1	0.266667			1.2	0.6	0.8	0.7
				2.8	0.7	0.6	0.3	2.93333			1.7	2	1.5	1.1
				3	0.1	0.2	0.9	2.03333			0.5	2	1.5	0.8
				1.2	1.5	0.8	1.1	0.466667			1.1	1.1	1.6	0.4
				3.6	0.8	0.5	1	0.266667			0.9	1.3	0.2	1.4
				1.4	0.1	4.1	2.3	0.7			1.3	0.2	0.6	0.1
				0.6	0.8	0.3	2.1	1.4			0.2	1.4	1.4	0.9
				2.8	1.2	0.1	2.3	1.76667			0.6	2.5	2	1.6
				2.6	0.1	1.6	0.8	3.03333			0.3	1.2	1.1	1.2
				2.8	3.3	0.1	1	2.36667			2.3	2.1	1.4	0.9
				1.2	0.1	1.9	0.3				0.4	1.3	0.4	0.5
				2	1.2	2.1	2.8				0.5	0.2	2.9	3.9
				1.4	0.3	0.6	1				1.8	1.9	2	0.5
				2.6	4.1	0.4	1.7				0.9	1.5	2.6	1.4
				6.6	1.4	2.3	0.6				0.7	0.2	0.1	1.3
				2.8	0.2	1.1	1.5				1.8	1.6	1.3	0.4
				4.2	1.2	4.8	2.1				0.6	1.4	1.5	0.8
				1.2	1.7	7.5	3.2				1.8	1.3	2.8	2
				0.8	1.5	0.5	0.7				0.8	0.6	1.8	1.6
				3	6.6	0.6	3.9				0.8	2.2	1.3	1.1
				2.6	9.3	1.9	0.5				0.3	1.3	1.7	1.2
				2.4	1	0.7	0.4				1.6	5.7	4.9	3.8
				1.6	5.6	0.5	1.1				0.8	1.3	1.4	0.8
				1.4	1.8	1.1	0.8				2.5	2.6	2.1	2
				1.6	0.4	1.1	1.3				0.2	2.4	1.9	1.1
				1	0.2	1.2	1.4				2.8	2.5	0.9	3.1
				2.8	1.8	1	1.5				0.2	1	1.2	0.6
				2.6	1.1	1	0.9				0.6	0.6	0.8	0.6
				3.8	1.3	1.6	0.9				0.4	0.2	1	0.3
				2.6	0.3	1.5	0.6				1.3	0.6	0.8	1.1
				2.8	1.1	0.1	1.8				0.6	1.2	2	1.1
				5.4	1.5	1.4	1				0.6	0.9	1.3	0.7
				2.2	1.2	0.9	1.5				1.1	2	2.1	1.3
				1.4	0.1	0.8	0.5				0.5	1.3	2.1	0.6
				1.1	0.7	0.2	1.5				0.7	2.1	1.7	0.3
				1.3	0.9	1.2	1				1.4	1.9	2.6	1.2
				0.6	1.2	1.3	0.3				2	2.4	3.1	1.2
				1.7	0.3	0.9	0.7				2.3	2.5	2.4	1.5
				1	1.4	1.3	0.2				0.5	1.8	2	1.1
				1.4	4.6	2.3	0.4				0.1	2.8	2.4	1.4
				1.3	0.7	3.8	1.1				1.6	1	0.7	0.9
				1.7	0.4	0.4	1.5				0.6	1.6	1.6	2.8
				1.4	7.1	0.2	0.5				1.3	1.7	1.7	1.6
				0.7	0.3	0.7	0.3				1.6	0.2	0.3	0.5
				1	6.9	1	0.4				1.2	2.9	2.7	2
				1.2	5.4	0.8	0				0.6	7.1	6.3	0.2
				1.5	0.7	2	1.8				0.2	2.3	2.4	3.4
				1.2	0.7	0.8	0.4				1.4	2.4	0.5	0.8
				2.2	0.5	1.4	1.2				0.3	0.2	1.9	1.1
				1.3	6.8	1.2	1.1				0	3.9	0.1	0.4
				2.3	0.9	0.8	1.2				3.4	1.2	1	0.9
				0.7	2.8	2.4	2.1				0.2	1.5	1.6	3
				1	2.3	2.1	1.4				0.4	2.6	2	2.5
				1.7	0.8	1.3	2.1				0.3	3.1	1.5	2.4
				2.6	8.5	0.8	0.6				1.6	1.6	1.1	0.4
				1.4	1.1	1	1.5				0.4	1.4	0.5	0.8
				1.1	1.2	0.9	1.1				1	1.1	0.5	1
				2	0.9	3.2	0.6				3.7	1.4	0.4	7.2
				0.2	2.3	0.6	2.6				0.3	0.5	1.3	0.9
				1.2	0.8	0.9	0.2				1.1	1.3	0.5	0.7
				2	0.5	1.9	0.6				0.2	0.1	2.7	0.1
				1.4	2.7	3.1	1.5				2.4	1.2	0.8	0.6
				2.8	1.3	2.3	2				1.6	1.5	1.3	1.7
				2.6	4.7	2	2.5				0.9	0.6	0.7	1
				1.4	0.5	1.2	3.1				1	2	2.1	1.9
				1.2	2.3	0.3	0.8				0.9	1.4	1.7	1.1
				0.9	1.3	1.6	0.8				0.8	2.1	0.6	1.7
				1.6	1.6	2.2	0.6				0.1	1.7	1.2	1.2
				1.3	0.8	6.8	1.5				4.4	3.9	1.9	1.6
				1.8	2.1	2.8	1.9				4.9	2.3	1.4	2.2
				1.1	2.7	1.3	0.9				3.2	0.9	0.9	0.9
				1	3.7	0.4	1.6				0.3	0.6	0.6	0.6
				1.1	2.9	1.7	1.8				0.7	1.1	1.1	1.1
				2	0.9	1	2.1				4	3	3	3
				0.2	0.4	1.4	1.6				1.5	0.1	0.1	0.1
				1.7	1.4	1.5	1.8				3	0.2	0.2	0.2
				1.4	1	1	0.9				2.5	0.3	0.3	0.3
				2.2	1	1.3	0.8				2	1.6	1.6	1.6
				1.2	1.2	1	1.1				2.4	2.1	2.1	2.1
				2.1	1.1	0.4	0.7				3.2	0.5	0.5	0.5
				0.8	0.8	2.7	0.9				3.3	1.4	1.4	1.4
				0.6	0.8	1.3	2				7.1	0.4	0.4	0.4
				1.7	0.7	1.6	1				3.7	2.2	2.2	2.2
				1.4	2.1	0.3	2.2				0.5	1.6	1.6	1.6
				1.9	1.5	1.5	1.1				1.3	3.2	3.2	3.2
				0.7	1.1	1.2	0.8				1	0.7	0.7	0.7
				0.4	2.9	0.6	1.4				0.2	0.2	0.2	0.2
				2.7	1	1.6	1				0.8	2	2	2
				2	0.4	0.3	3				0.8	2.2	2.2	2.2
				1.2	1.1	0.6	1.2				1.8	4.1	4.1	4.1
				4	1.2	1.2	0.7				1.2	6.5	6.5	6.5
				1.5	0.2	0.4	0.6				0.8	0.6	0.6	0.6
				2.1	0.5	1.4	0.4				3.2	0.4	0.4	0.4
				2.3	0.7	1.9	0.8				3.3	0.6	0.6	0.6
				0.4	0.1	0.2	1.5				1.7	0.3	0.3	0.3
				1.3	1.1	0	1.4				1.9	0.4	0.4	0.4
				2.5	0.1	1.4	0.8				1.5	1.1	1.1	1.1
				1.9	3.2	0.6	0.8				1.9	1.8	1.8	1.8
				1	0.2	1.1	2.2				0.3	1.2	1.2	1.2
				1.2	1.2	1.7	0.7				0.9	1.9	1.9	1.9
				0.5	0.7	1.3	0.5				1.4	2.4	2.4	2.4
				0.7	1.1	3	1.9				0.2	0.8	0.8	0.8
				1.5	1.3	1.5	2.2				0.9	1.6	1.6	1.6
				2.7	0.8	2.5	1.2				2	0.5	0.5	0.5
				0.7	1.4	1.3	1.3				1.5	0.5	0.5	0.5
				1.9	0.9	2.7	1.3				1.4	1.8	1.8	1.8
				2	1.9	0.8	1.6				0.8	0.7	0.9	1
				1	4.5	1.2	1.6				2.7	3.5	0.2	0.5
				1.3	1.8	2.7	0.3				2.8	1.9	0.3	0.2
				0.5	0.9	0.6	0.3				2.4	2.2	2.3	0.3
				2.9	1	1.5	1.7				2.1	0.2	0.3	0.3
				0.2	2	1.4	1.3				1.8	2.3	2.4	2.6
				1	0.3	1.4	2.2				3	0.9	0.6	0.8
				1.5	0.7	0.7	1.7				2.7	5.8	5.1	4
				0.2	1.8	0.3	2				1.9	4	4.6	4.5
				1.5	2.1	0.7	1.6				1.4	2.4	2.5	1
				1.2	0.4	0.3	1.1				2.5	1	1	0.6
				0.2	3.5	1.6	1.7				2.8	0.6	1.4	1.1
				1.1	2.4	1.3	1.9				0.6	0.3	0.7	0.3
				0.7	0.5	0.8	2.2				0.8	0.8	0.7	0.8
				0.7	1.7	1.1	1.3				1.1	2.9	3.9	4.1
				0.3	2.5	1.5	1.7				0.5	0.8	4.2	0.3
				1.5	1.6	2	1.3				0.6	2.5	0.6	0.5
				1.9	1	1.8	0.2				0.7	2.7	4.8	0.9
				1.1	0.9	1.4	1				0.4	0.9	1.3	2.4
				1.3	1.2	1.2	0.7				0.2	1.1	0.8	0.4
				0.6	2.1	1.5	0.6				1.9	1.4	1.1	0.3
				0.9	1.5	0.9	2.2				1.1	3.8	1.6	0.4
				2	1	1.4	0.7				2.1	2.7	2.1	0.2
				1.2	1	0.6	0.6				1.5	2.8	6.8	0.1
				0.9	0.7	1.9	0.5				1.2	0.9	0.8	0.8
				1.8	0.9	1.7	0.6				0.5	0.3	0.8	1.2
				0.8	0.5	0.9	0.4				0.6	0.9	0.6	0.8
				0.5	1.2	1.5	0.6				0.2	0.3	3.3	1.4
				1.8	1.9	1.1	1.5				2.1	3.6	1.1	2
				0.6	0.3	0.5	0.9				2.1	1.3	2.5	1.3
				1.9	2	1.9	1.2				0.9	0.3	0.5	0.9
				1.2	1.1	1.2	2				1.1	1.6	2.8	2.9
				0.9	0.2	0.3	1.5				1.4	4.1	5.2	2.1
				1	1.5	0.7	2.5				1.1	2.2	1.6	1.3
				0.8	1.1	0.8	1.5				1.3	0.2	0.3	0.7
				2.2	0.2	0.5	1.2				0.8	0.6	0.9	1.5
				0.8	1.3	0.6	0.8				0.7	3.9	0.3	1
				2.3	0.5	1.2	1.4				0.8	4.8	5.8	4.1
				1	0.2	0.7	1				1.5	0.7	1.5	2.3
				1.3	0.3	1.5	2.5				1.9	2.2	5.1	4.7
				1.3	0.9	1	0.9				1.3	1.5	1.2	0.8
				1.6	1.3	1	0.4				1.5	2.7	3.4	4.2
				0.3	1.1	2	1.9				0.8	2.1	1.5	1.9
				2.1	0.9	0.4	0.4				1.5	3.4	0.9	1.9
				0.8	0.7	0.2	1.3				2	0.4	0.6	0.2
				0.2	1.8	1.8	2.2				1.2	2.8	2.6	2.4
				1.9	1.1	1.9	1.4				2	3.7	4.8	3.9
				0.4	0.1	1.3	0.3				1.9	1	0.1	0.2
				0.7	0.7	1.9	1.4				1.3	5.7	0.1	0.2
				0.3	1.4	1.4	1.7				2.6	6.2	5.5	4.9
				0.2	1.2	2.3	0.7				1.5	3.6	3.1	4
				2.3	1.7	2.4	0.7				2	0.4	0.7	0.7
				0.6	1	0.7	1.4				0.3	7.3	6.1	4.7
				1.3	2	1	1.3				0.7	0.9	0.5	2.4
				0.5	1.1	1.7	1				0.4	0.2	1.6	0.2
				1.7	0.5	2.6	2.7				1.2	3.7	3.3	0.6
				0.6	0.2	2.7	1.1				0.6	0.9	0.4	0.6
				0.8	1.1	2.2	0.7				0.4	1.2	0.9	1.5
				1	1.6	2.6	0.2				1.3	0.2	1.1	1.3
				0.9	3.3	1.1	1.6				0.4	3.8	3.7	3.8
				1.7	1.1	1.2	1.7				1.9	0.5	0.4	0.8
				2.6	2.5	0.7	0.5				0.8	4	4.4	4.3
				0.7	1	1.4	1.4				1.7	8.1	3.5	1.9
				3.3	1.4	1.9	0.3				1.2	3.9	0.1	0.2
				2.3	3.5	1.1	1.1				0.8	3.5	3.9	2.8
				3.9	2	2.3	1.8				0.7	1.2	0.7	0.6
				0.9	2.6	1	1.5				1.1	0.5	0.7	0.3
				1.7	2.6	0.2	0.7				1.3	3.9	4.3	4.6
				2.7	2.9	1.4	2.3				1.3	0.7	0.7	0.7
				1.9	1	0.5	2				0.7	0.3	0.4	0.9
				0.4	0.1	0.1	0.4				0.5	2.6	2.8	3.8
				0.7	0.3	2.5	0.6				1.2	5.9	6.1	3.7
				1.1	5.3	1.5	1.3				1.7	0.1	0.2	0.4
				2.5	2.1	0.9	1.5				1.1	5.6	4.8	5
				2	3.7	0.5	1.3				1.2	13	3.5	0.5
				1	1.9	0.4	1.5				1.4	1.7	1.7	2.6
				1.1	0.5	0.7	0.7				1.1	6.6	7.8	4.3
				1.1	0.4	0.3	0.6				2.1	2.5	3	1.9
				2.3	0.2	0.9	1.8				3.6	4.3	5.8	5.5
				2.6	0.2	0.5	0.4				1.5	2.7	2	1.4
				2.3	5.2	1.2	0.4				1.7	2.8	0.1	0.3
				2.3	0.4	0.6	3				2.2	0.6	6.8	0.9
				2.1	3.4	1	1.2				0.9	2.3	2.3	1.8
				1.3	4.2	2.3	0.3				1.9	1.2	1	2.6
				2.4	0.3	0.9	0.4				0.7	0.8	0.7	0.9
				1.2	1.1	0.3	2.8				1	1.4	2.4	2
				0.1	1.4	0.2	1.2				1	3.3	3.5	3.7
				0.5	0.3	1.4	2				1.3	2.1	0.6	1.4
				1.1	0.3	0.9	2.2				1.1	5.8	5	4.6
				1.3	0.1	1.3	0.3				1.8	1.3	0.6	1.2
				1.2	0.5	0.4	1.6				0.8	2.3	1.4	1.3
				2.3	0.5	0.9	1				0.3	4	4.1	3.4
				1	1.4	0.8	3				1.1	0.2	0.4	1.1
				0.5	0.2	7.6	2.7				0.9	1	1	1.2
				0.5	4.4	2.7	1.1				0.5	3.5	3.3	4.5
				1.1	0.6	2.3	0.5				0.1	1.5	2	2.6
				1.4	3.8	1.8	2.6				1	6.2	5.6	2.8
				0.1	1.7	0.2	0.5				0.4	0.9	0.7	0.5
				0.6	0.9	1.9	1.9				1.3	0.6	0.8	0.6
				0.7	0.4	1.6	0.8				3	0.5	1.2	0.7
				0.7	7.2	1	1.2				0.4	4.5	1.3	0.2
				2.3	2.6	0.8	1.7				1.1	3.5	1.5	1.6
				1.5	1.2	1.1	1				1.8	0.3	0.9	0.5
				0.5	1	1.1	1				0.8	0.7	0.7	1
				2	5.6	0.3	0.7				1.9	0.2	0.7	0.3
				1	1.3	1.3	1.6				1.1	2.5	0.7	0.7
				1.8	0.8	1.4	2				1.4	2.3	0.3	1.3
				1.5	2.1	0.6	2.5				3	1.7	2.3	2.5
				0.9	1.8	0.5	1.6				1.5	1.1	1.3	1.5
				1.5	1.4	1.8	0.5				1.6	2.4	2.3	2.4
				1.2	6	1.9	0.8				1.8	1.1	0.8	0.8
				1.1	8.6	0.9	2.5				0.8	1.1	0.9	1.9
				0.2	1.7	1.5	2.1				1.3	0.5	1	0.6
				1.7	1.6	0.1	1.4				1	0.9	1.3	2.1
				0.6	3.8	0.5	0.9				0.9	0.6	0.5	1.1
				1.3	0.6	0.9	1.5				0.7	0.6	1.4	0.7
				2.1	5.3	2.3	0.3				0.5	2.2	1	3.2
				1.2	2.9	0.8	0.3				0.7	1	3.2	1.2
				0.1	0.9	1.6	1.3				0.8	2	1.3	2.2
				0.6	1.9	0.6	0.9				1.4	1.4	0.9	1.5
				0.8	0.2	0.7	0.8				3.9	0.5	0.4	0.7
				0.4	0.5	1.3	0.6				1.8	0.9	1	0.6
				0.4	0.7	1.6	0.4				1.7	0.3	0.2	0.5
				1.5	0.1	2.9	0.6				1.8	1.1	1.5	1.7
				1.1	0.8	1	0.1				1.1	2.3	1	1.3
				1.1	3	1.4	0.6				4.4	2.3	1.9	1.7
				1.3	1.5	2	0.5				0.7	2.9	2.7	3.4
				0.9	0.7	0.3	2				2.2	1.4	0.6	1.1
				2	0.3	1.7	1.5				1.4	1.7	1.6	1.5
				2.3	2.4	0.6	0.5				0.4	0.9	1	1.6
				1.9	0.1	5.3	5.5				0.6	2	0.4	1.2
				0.6	0.6	1.1	0.6				1.1	3.1	3.8	2.8
				1.6	5.9	1.5	1.3				1.2	0.9	0.6	1.5
				0.7	5	0.9	1.9				0.1	4.7	2	2.1
				2.3	1.6	2.5	0.3				0.7	0.8	1.2	2.2
				0.1	0.3	2.3	1.2				0.2	2.6	1.2	1.5
				0.8	0.6	1.2	0.7				0.4	1.2	1.5	1.7
				1.5	4.1	1.9	2.1				0.4	0.6	1.4	1.5
				0.8	3.2	1.5	1.9				1.9	1.3	0.7	1.6
				1.9	2.5	0.9	1.3				1.7	4.2	2.2	2.7
				0.6	1.9	3.5	1.8				0.8	2	2.1	3
				1	0.6	2.4	1.4				2.8	5.4	1.6	0.1
				0.9	0.7	2.7	1.7				1.2	2.3	0.8	1.6
				0.9	4.6	1.3	2.4				1.1	2	1.8	2.1
				0.4	1.2	2.1	1.5				0.5	1	0.8	1.2
				0.4	1.9	2.6	1.9				1.6	3.6	3	3.6
				1.7	1.6	2.1	2				0.5	0.8	0.5	1.6
				4.6	4.2	0.2	2.4				2.3	5	3.4	4.1
				1.7	10.1	1.6	1.2				1.4	2.4	2.2	1.4
				1.3	0.7	2.2	1.5				1.2	1.2	0.4	1
				1.6	3.7	1.8	2.5				1.6	1.4	2.1	2.5
				0.5	0.3	2.1	2.8				1.3	2.8	1.7	1.7
				0.6	1.5	0.4	3.7				2.8	3.3	0.4	1.1
				0.7	0.9	0.7	1.8				1.6	0.4	0.3	0.4
				0.5	1.6	0.6	1.2				0.2	1	0.4	0.5
				0.3	2.7	0.2	0.6				0.2	1.6	1.7	1.9
				1.1	1	1	1.4				0.2	0.9	1	0.6
				1.4	1.6	3.1	0.8				0.2	3.1	2.7	3.2
				1.3	0.6	0.6	1.4				0.3	1	0.5	0.8
				5.9	0.8	0.3	2.1				0.2	4.1	3.4	2.4
				1.6	3.3	1	1.3				0.9	1	0.7	0.4
				1.8	1.2	1.5	0.2				0.4	2.2	2.2	1.8
				1.5	2.8	1.5	1.9				0.1	0.5	0.4	0.5
				0.4	2.9	3.4	4.6				0.3	1.2	1	1.4
				1	1.5	0.5	1.3				0.3	1.2	1.1	1.4
				1.5	2.4	0.8	1.8				2.4	1.5	2	1.7
				2.4	0.8	0.4	0.5				0.6	2.3	1.8	2.1
				2.2	2.6	3	1.5				0.1	1.3	0.9	1.1
				0.7	0.6	1.6	2.3				0.9	1	0.5	0.8
				2.6	0.2	0.9	1.7				0.9	1.4	1	1.4
				1.9	0.2	0.8	0.7				0.6	0.6	0.6	0.4
				1.1	0.8	3	0.8				0.9	2.2	1.8	1.9
				1.4	2.3	0.5	0.6				0.2	1.1	2.9	2.6
				1.1	0.8	0.9	1.7				0.8	1	0.4	1.2
				1.4	0.6	5.5	1.2				1.6	2.5	3.9	1.9
				2.1	2	0.7	1.6				0.3	2.1	1.5	1.3
				5.7	1	1.8	0.3				1.5	0.6	0.3	0.6
				3.8	0.4	2	2.6				0.4	6	6.3	4.4
				2.2	0.7	2.6	1.6				0.9	2.3	1.9	2.4
				1.8	1.3	0.5	0.5				0.4	0.9	0.2	0.5
				2.6	4	1.4	3.4				0.9	1.9	2.6	2
				2.5	5.7	0.7	1.4				0.2	0.9	1.2	1
				0.9	1.3	0.7	0.7				0	0.5	0.5	0.8
				1.4	1.9	1.9	1.6				2.4	3.1	2	1.3
				0.6	1.1	0.7	2.8				0.7	2	0.8	1.5
				5	1.4	1	2.1				2.5	1.3	1.4	1.3
				1.6	1	0.7	1.1				0.4	0.9	1.2	1.6
				1.6	1.2	1.5	2.7				0.3	1.2	2.5	1.1
				0.6	2.2	2.5	2.3				0.3	1	1.6	1.7
				0.7	0.8	1.1	0.9				2.4	0.6	2.6	1
				1.4	2.3	1.1	3.1				0.3	3	2.5	1.8
				1.1	2.4	0.9	1.6				0.6	5.3	2.5	2
				1.6	1.8	2.1	0.3				0.8	2.3	2.4	2
				1.4	3.7	2.4	1.2				1.1	3.4	3.2	2.9
				1.3	1.1	1.9	0.2				0.3	4.1	3.6	1.6
				0.8	1.4	1.9	0.5				0.3	1.5	0.9	0.8
				1.7	5.1	1.5	0.5				0.7	2.7	3.9	2.8
				2.3	3.1	2	1.1				1.8	2.3	1.1	1.4
				2.4	2.3	1.2	0.3				0.9	1.3	1.2	1.4
				1.6	1.9	1.5	0.6				0.1	2.6	2.5	3
				1.4	1.9	1.7	1.9				0.7	0	0	0
				1.7	2.9	3.3	1.1				0.1	1.2	1.3	0.8
				0.4	2.4	2.3	1.1				0.2	0.2	0.3	0.4
				0.6	2.7	1.9	1				0.9	0.6	0.4	1
				1	0.8	1.4	1				0.1	0.4	0.2	0.3
				0.7	2	0.7	1.8				0.5	0.3	0.8	0.4
				0.2	2.6	1	1.7				0.3	0.9	0.6	1
				0.3	3	0.2	0.7				0.1	0.4	0.3	0.3
				0.9	1	1.4	1.2				1.6	3.6	5.2	5.2
				1.8	0.9	1.1	1.3				0.8	0.8	0.5	0.3
				2.5	0.9	3	1.8				0.2	1.8	1.1	0.7
				0.9	3.4	0.4	0.9				0.4	1.7	1.3	1.7
				1.9	0.1	1.8	0.6				0.2	0.7	0.5	0.5
				0.7	1.7	0.4	1.7				0.4	0.3	2	0.1
				2.1	0.1	1.1	2				0.8	1.2	0.9	0.9
				3.2	1	1.9	0.9				0.2	0.3	0.3	0.5
				2.7	0.6	2.4	2.4				0.3	1	0.5	0.9
				1.8	3.2	0.9	0.9				0.4	2.2	2.2	1.5
				1.9	1.9	1.9	2.3				1.9	2.7	2.6	2.1
				2.4	1.1	0.7	1.4				0.7	0.8	0.5	0.5
				1.2	0.4	0.4	1.6				0.9	0.8	1	0.7
				0.3	2.6	0.7	5.9				0.5	0.9	0.7	0.3
				0.5	1	0.7	0.9				2.2	0.8	0.6	0.7
				0.6	1	5.5	1.2				0.4	1.3	1.2	1.2
				0.6	0.5	1	1.4				0.1	0.2	0.7	2.7
				0.5	0.8	0.8	0.9				0.2	1.8	1.9	1.3
				1.4	0.2	0.8	1.2				2.3	1	1	1.2
				2.3	0.4	0.4	1.2				0.4	1.3	0.8	1.1
				1.6	0.9	1.8	1.7				1.3	1.2	1.4	1
				0.3	0.6	0.8	1.4				0.7	0.8	0.7	0.8
				0.3	0.5	3.1	1.4				1.2	0.5	0.7	0.5
				1.9	2.6	2	0.3				0.2	2.2	2.5	2.2
				1.2	0.5	0.9	0.9				1.2	0.4	0.5	0.5
				0.7	4	1.7	0				0.4	0.5	0.7	0.5
				1	3.1	1.2	2				0.3	0.2	0.8	0.5
				3	0.8	1.6	1.3				0.4	0.9	1.1	0.9
				1.9	3.5	1.1	0.5				0.1	0.3	0.9	1.7
				1.9	2.5	1.6	0.5				1	0.7	0.9	1
				1.5	1.3	2	0.5				2.2	1.1	1.5	0.8
				1.2	0.9	0.5	1.9				1.5	0.7	0.9	1.1
				0.8	1.4	1.6	0.8				0.8	3.2	0.6	2.1
				0.8	2.2	1.9	1.6				0.4	1.8	1.6	1.8
				1.3	0.5	0.2	0.5				0.4	2.7	1.6	2
				1.4	1.4	2.3	1				0.7	4.3	3.3	3.3
				0.5	2.5	0.4	0.5				0.7	2	1.2	0.9
				0.3	2.7	0.4	0.6				0.9	2.6	1.7	0.9
				0.5	1.2	0.4	1.4				1.5	0.8	0.9	1.3
				0.8	0.3	1.4	0.5				0.1	0.5	1.2	1.1
				0.4	0.5	0.7	4.3				0.7	0.2	0.5	0.8
				0.9	0.5	0.5	2.2				0.1	2.7	2.1	3.2
				1.2	1.4	1.6	1.1				0.9	0.5	0.7	0.7
				1.7	0.5	1	0.9				0.1	2.7	2.8	1.3
				2.9	0.6	1.3	5.4				1.1	1	1.1	0.7
				0.5	1.5	1	3.2				0.1	0.9	0.8	0.9
				0.8	0.8	0.5	0.7				0.2	1.3	1.2	1.6
				1	0.2	1.7	1				0.6	2.9	2.1	3.1
				2.2	2.3	2.9	2				0.3	3.7	1.6	2.5
				2.7	2.3	0.8	0.6				0.6	2.2	1	1
				1.4	3.5	1.9	1.4				0.4	3.1	1.1	0.4
				5	4.5	1.1	4.8				0.1	0.9	1.6	1.4
				0.5	0.7	1.3	0.8				0.8	3.1	1.2	1
				1.9	2	1.4	2				0.2	1.2	1.4	0.9
				4.1	2.6	0.8	1.2				0.3	3.4	1.8	2
				2.3	2.8	1.8	6.2				1	0.7	3.1	0.5
				0.6	1.3	1.8	1.2				0.1	2.7	1.4	1.6
				1.8	1.3	1.4	2.4				0.2	2.2	2	1.3
				0.8	1.2	2.6	2.3				0.7	5.1	3.2	3.3
				1	2.7	0.9	1				0.5	4	1.6	1.4
				0.8	2.5	2.1	1.6				0.9	1	1.5	0.9
				1.8	3.5	1.5	2.1				1.6	2	2.3	2.4
				0.9	0.5	1.6	2.3				0.7	1.9	1.9	1.5
				0.4	2.6	2.3	1				0.5	1.5	2.4	2
				0.3	3.8	1.4	0.4				0.4	2.9	2.2	1.3
				2.8	3	2.5	1.3				0.4	1.5	1.4	1.5
				0.3	2	1.5	2.6				0.1	3.8	2.3	1.9
				1.1	1.2	1	2.4				0.3	2.2	2	1.3
				0.6	1.9	2.3	0.6				0.4	2.8	2.8	2.5
				1	2.2	0.7	2.9				0.6	2.1	1.9	1.3
				2.9	0.5	1.7	1.7				0.8	0.3	0.1	0.5
				2.6	3.4	1.6	0.9				1	0.3	1.2	1.1
				0.7	1.3	1.2	2.8				1	0.3	1.7	0.2
				1.6	1	0.2	0.1				1.5	1.2	1.6	1.2
				1.4	0.8	1.6	2.1				0.2	3.7	3.4	1.7
				0.8	1.2	0	0.8				0.2	2.9	0.3	2.7
				0.7	3.3	1.2	2				0.6	0.4	1	1.4
				0.1	0.7	2.1	4.2				1.1	2.1	2	0.9
				1.2	0	0.9	3				0.4	0.5	2.6	1.6
				1.4	0.3	2.8	1				1	2	2	2.4
				3.2	1.3	0.6	2.7				0.2	0.2	0.3	0.5
				0.4	0.7	1.5	0.6				1	0.4	0.9	2.6
				1.5	0.1	0.9	0.8				1.2	1	1.6	1.9
				1.2	0.1	0.2	0.5				1.1	0.6	0.4	0.5
				1.3	0.4	0.3	1.5				0.6	0.6	0.8	0.3
				0.4	2.1	1.2	1.3				0.6	0.7	0.5	0.6
				0.5	0.9	3.1	2.5				0.5	2.2	1.2	0.9
				4.4	0.2	0.7	0.8				0.3	5.3	2.9	1.9
				2.1	0.7	4.8	2.8				1.2	0.3	3.2	1.8
				1.9	1	0.3	5.2				1.3	1.4	2.4	2.3
				0.4	0.5	4	0.7				1.9	4	5.1	4.2
				2.5	0.9	2.9	0.6				1.6	1.5	1.4	0.4
				0.3	0.5	0.7	0.6				0.3	1.9	2.3	2.4
				0.8	1.6	0.9	1.4				1.1	2.4	2.1	1.7
				0.4	1.8	7.6	3.4				1.1	3.5	3	1.2
				1.6	1.9	0.2	1.3				1.7	1	2.9	2.5
				0.5	1	1.4	2.9				0.8	5.9	4.5	4.4
				1	3.5	1	0.2				0.7	4.4	4	2.2
				1.1	0.6	0.5	2.4				1.3	1.2	1.7	1.5
				0.8	2.4	0.8	1.7				2.1	3.3	3	2.1
				3.1	1	1.5	2				0.8	6.2	12.4	0.4
				0.6	1	5	1				0.7	1.6	1.2	1.4
				0.6	0.6	0.7	3.9				3.8	0.9	2.9	2.8
				1.2	6	1.8	0.6				1.3	3	2.8	2
				0.5	5.7	3.6	0.9				1.6	1.2	0.5	0.8
				1.8	2.1	5.3	4.7				1.5	2.3	3.9	3.1
				0.3	1	2.3	0.6				1.8	6.8	4.5	3.2
				0.1	2.2	2.5	0.8				0.7	1.4	3	2.6
				5.2	2.2	2	0.5				1.4	2.5	2.8	1.8
				3.5	2.1	0.9	0.9				1	5.5	4	4.6
				0.1	2	1.5	1.7				0.7	2.00577	2.09139	1.91395
				1.9	3.3	2.6	1.1				0.7	1.4256	1.49139	1.7349
				3.2	0.8	2.4	0.8				0.4	16.3301	18.2073	18.6543
				0.2	0.5	0.9	2.5				1.1	1.1828	1.38102	1.07678
				0.5	6.5	0.3	3.4				0.2	0.151242	4.41614	5.79378
				0.4	3.3	1.7	5.8				1.2	1.65832	1.50186	1.47222
				1.2	1	3.7	1.9				0.9	3.15464	5.17682	2.72114
				0.6	0.4	3.1	4				1	1.24119	1.4168	1.12327
				1.8	1.4	2.5	0.9				0.3	0.988851	1.1164	0.977698
				0.5	4.3	2.9	2.1				1.7	0.648456	0.773233	0.64407
				0.5	4.1	1.9	0.4				1.3	0.505851	1.21146	0.538078
				0.5	0.9	0.7	4.1				1	0.136018	0.153376	3.65892
				0.9	0.6	1.6	2.7				1.8	3.5196	1.41976	1.94836
				1.2	2.7	0.2	2.2				1.8	0.225084	1.09863	0.42569
				1.3	0.5	1.7	3.5				1	0.287476	0.633872	0.446851
				1.1	1.1	0.9	0.4				0.6	0.329285	0.638286	1.17879
				1.3	0.2	2.8	5				1.7	1.74561	2.23535	2.92499
				0.6	2.4	0.1	2.6				1.9	1.29453	1.0568	1.37076
				1.6	1.4	2.7	1.3				4.6	1.20217	0.866785	3.38062
				0.9	3.7	0.6	2.8				1.6	0.521599	0.624188	0.599087
				2.1	0.1	1.8	2.6				0.7	2.54938	2.76055	2.69323
				0.6	2.6	0.3	2.3				0.7	0.606728	0.633856	0.52886
				0.7	0.2	1.2	0.4				0.2	1.07374	0.688058	0.595485
				1	2.1	0.7	0.6				0.2	0.355624	0.299858	0.371991
				1.2	0.1	1.8	0.5				0.2	0.206137	0.36936	0.368816
				1.1	0.8	1.4	0.1				1.1	1.71584	1.54285	1.65859
				0.9	0.4	2.3	2.1				0.3	0.311628	0.469273	0.427907
				0.1	1.3	0.8	3.3				1.2	0.216355	0.434079	0.600046
				0.6	1.6	1.3	0.3				1.3	0.87415	1.03379	0.976174
				1.9	1.8	6.6	4.5				2.2	2.0022	2.32657	5.04771
				0.2	1.3	1.2	3					0.335178	0.386444	0.437478
				0.4	0.9	2.5	1.7					0.347375	0.517333	0.688674
				2.2	8.3	5.3	1.9					2.93023	2.62866	4.14028
				1.3	2	0.6	1.6					0.373821	0.419292	0.411256
				1.4	0.6	1.7	1.1					0.307451	0.305838	0.333448
				1.8	1.4	1.2	4.1					0.356759	0.385832	0.358172
				3.9	0.4	3	2					0.8	0.9	0.5
				1.8	1.5	0.4	3.8					0.1	0.3	0.8
				1.1	0.8	0.5	2.8					1.6	1.5	1.4
				1.9	1.9	1.9	0.2					0.8	0.1	0.3
				1.7	2.3	2.3	0.8					0.1	1.9	0.3
				0.5	4.9	0.6	1.2					0.1	0.3	0.8
				2.6	2	4.1	1.3					0.1	0.3	0.2
				1	2.4	2.4	0.8					0.1	0.2	0.1
				5.6	0.7	1	3.1					0.5	0.4	0.3
				1.6	2.6	4.4	0.8					0.6	0.7	0.8
				0.5	4.8	1.9	1.9					3.1	2.5	1.3
				3.1	1.7	0.7	0.5					0.7	1.1	0.8
				2.3	4.8	2.1	4.8					0.6	0.4	0.5
				0.9	0.3	0.2	0.7					0.5	0.7	0.6
				0.9	0.5	2.1	1.9					1.1	0.7	0.7
				1.5	3.2	0.7	3.1					7.1	0.1	2.1
				1.1	0.7	1.2	3.6					0.4	0.6	1
				1.8	0.8	1	1.6					3.6	3.6	1.8
				2.3	0.3	2.5	2					0.8	0.7	0.4
				0.5	2.8	4.6	0.5					1.9	0.3	0.5
				0.2	4	1.3	3.2					0	0	0
				1.7	2.9	3.5	0.2					1.4	1.2	1.7
				1.5	2.6	0.8	2.9					0.4	1	1.1
				0.4	3.3	2.4	2.1					2.3	1.6	1.8
				0.2	5	0.4	2.2					3.6	4.8	0.2
				1	1.9	2.4	1					3	0.7	0.7
				1	1.4	2.2	2.2					0.1	3.4	2.5
				0.7	0.4	2	2					9	0.4	0.3
				3.5	2.9	1.4	0.3					0.6	0.8	1.6
				0.8	3.3	0.4	3.9					0.3	3.2	0.4
				0.8	0.6	6.4	2.4					1.3	0.5	0.6
				1	1.8	3.6	0.4					0.1	0.4	0.1
				1.3	0.3	0.2	0.7					2.3	3.1	2.3
				1.6	6.9	4.2	0.9					1.3	1.7	1.2
				1.6	2.7	2.4	0.2					2.2	0.1	0.1
				0.5	0.2	1.6	1.2					4.5	2.1	0.4
				1.7	3	0.3	0.3					1.2	1	1.2
				0.8	3	0.5	2.6					0.4	0.7	0.5
				1.7	1.5	0.6	0.7					0.8	1.2	1.1
				1.9	0.3	0.9	0.8					0.9	0.3	0.4
				1.4	0.2	2.3	0.4					1.4	1.4	1.5
				3.3	0.9	3.7	0.6					1.4	1.2	1.8
					2.6	0.1	1.9					1.1	1.4	0.9
					1.8	4.8	0.7					0.4	0.9	1.1
					2.9	3.3	2.1					0.8	1.2	0.7
					5.4	1.2	1.5					2.4	1.8	1
					6.4	1.2	0.8					0.9	1	1
					3.8	1.2	0.9					2	0.1	0.5
					0.9	1	2.4					0.8	1.5	2.1
					1.5	6.3	2.1					2.1	1.6	1.5
					1.2	1.5	0.8					1.5	3.8	3.9
					0.8	2.3	1.7					1.1	1.1	0.7
					4.8	3	1.7					2.5	0.2	0.3
					2.1	2.9	0.2					3.1	2.8	2
					2.1	1.3	1.7					1.9	1.7	1.3
					3.3	1.5	0.7					0.4	0.9	0.9
					3.6	0.7	3.4					0.9	0.7	1
					1.4	0.2	1					1.6	1.4	0.9
					1.1	2.3	0.9					3.2	2.4	2.3
					0.4	1.1	3.4					2.7	2	2.6
					0.3	1.9	2					4.9	1.9	2.6
					2.4	2.2	1.1					2.7	1.1	1.4
					1.2	0.2	0.4					0.2	0.3	0.4
					0.9	1.2	0.3					1.3	1.5	2.1
					0.3	3.8	1.8					1.2	1.6	0.7
					0.3	2.8	0.8					1	1.2	2.2
					0.8	4.4	0.6					2.8	0.5	0.9
					1.8	1.7	0.8					0.2	0.6	0.6
					1.8	1.8	0.8					0.8	0.4	0
					4.4	0.5	1.1					0.4	0.7	0.1
					4.2	3.2	0.4					4.7	4.6	2.3
					4.1	0.4	1.4					3.1	4.2	2.5
					3.2	2	2.5					1	0.8	0.4
					2.8	3.1	1.9					0.1	0.3	0.3
					3.8	2	0.8					2	0.5	0.2
					1.8	0.5	2.4					1.3	1.3	0.4
					1.8	2.7	3.8					0.7	0.3	0.3
					2	1	0.8					1.6	2.4	0.1
					2.6	0.4	1.2					1.1	1.5	0
					2.9	1.8	1					0.4	0.8	0.4
					0.6	2.7	0.7					2.7	0.1	0
					2.2	0.5	2.9					0.6	0.6	0.1
					1.8	1.1	2.9					0.1	2.6	0
					3	1	0.3					1.2	1.7	0.3
					0.2	0.2	4.6					0.7	0.6	0.1
					1.3	1.5	0.6					1.1	0.5	0.2
					1.2	0.5	0.5					1.6	1.5	0
					0.2	1.9	1.1					1.4	2	0.4
					0.7	0.5	2.4					1	0.5	0.6
					0.2	0.7	3					0.1	2.4	0.1
					1.3	0.3	0.9					0.9	1	1.3
					0.7	1.1	1.4					1.3	0.2	0.2
					0.6	1.7	0.7					2.1	1.9	1.4
					0.6	1.5	1.9					1.3	0.8	0.7
					0.7	2.5	0.1					0.3	0.4	0.2
					1.2	1.3	2.4					0.4	0.6	0.4
					0.3	0.9	4.1					0.2	0.1	0.1
					2	3.5	0.2					0.2	0.5	1
					1	2.8	0.1					0.9	0.8	1
					0.3	1.5	0.5					0.3	0.6	0.5
					2.6	0.7	0.4					0.3	1.1	1.7
					0.6	1.5	0.5					0.1	2.5	1.2
					1	1.9	3.8					0.2	0.5	0.3
					0.9	2.1	1.1					0.4	1.2	1
					4.4	2.8	1.1					0.3	0.2	0.2
					1.8	0.3	1.2					0.7	0.3	0.3
					4.7	2.6	7.1					0.1	0.5	0.1
					3.6	1.1	1					1.1	1.2	0.9
					0.9	1	0.5					0.5	0.9	1
					2.1	4.3	1.4					0.3	0.7	0.2
					0.6	3	1.3					1	0.7	0.4
					1.6	1.2	0.2					0.3	0.6	0.4
					3	3.9	3.7					0.3	0.2	2.3
					2.2	1	2					0.4	0.3	1.6
					3.3	2	2					0.1	0.1	0.9
					2.8	1.5	2.3					0.7	1.1	2
					0.9	1.2	1.4					0.3	0.5	2.6
					1.4	0.3	3.2					0.5	1	0.7
					0.9	0.9	0.3					0.8	0.4	0.4
					0.6	1.3	0.2					0.3	2.3	0.2
					1.9	0.3	0					0.2	1.3	0.2
					1.3	3.1	0.9					0.9	1.1	0.2
					4.3	2.2	0.3					0.1	0.7	0.4
					0.7	1	0.2					0.3	3	3.9
					0.5	1.5	0.5					1.9	1.8	1.1
					2.1	2.1	0.3					0.7	2	2.2
					0.5	6.1	1.1					0.2	0.5	0.4
					0.8	0.6	2					0.3	3.5	0.1
					2	1.3	0.2					0.9	0.8	0.8
					3.4	1.5	0.8					0.4	0.1	0.2
					0.4	0.4	0.6					0.2	0.2	0.2
					0.4	2.2	1.1					0.1	4.8	2.2
					1.3	2.7	1.3					0.7	0.8	0.4
					0.2	1	2					1.4	2.9	0.6
					2.6	3.9	1.1					0.2	1	0.2
					3	2	0.7					1	2.1	0.4
					1.9	1.1	1.6					1.1	0.8	1
					2.8	0.8	1.1					0.2	0.5	0.7
					0.3	1.6	1.1					1.6	2.4	1.4
					5.1	3.9	0.9					0.1	3.5	4.6
					1	0.8	1.1					1	0.4	0.3
					1.1	2.2	1.6					1.1	1.3	0.5
					3.8	0.6	0.6					0.3	2.5	0.4
					0.2	1.7	0.1					0.2	1	0.4
					5	0.2	0.8					0.5	0.3	1.4
					0.4	3.2	0.8					4.7	7.2	4.9
					1	3.6	0.2					1.4	2.6	0.2
					0.1	6.7	0.5					0.4	0.2	0.2
					1.2	0.1	1.5					0.6	1	1.6
					3.7	4.2	0					0.7	0.6	0.5
					3.1	0.1	3.1					1.9	1.6	2
					0.2	0.4	1.2					2.1	2.1	2.7
					0.8	5	1					0.2	0.5	0.4
					6.5	0.8	1					0.3	0.3	1
					0.1	1.3	1.4					1.5	2	2.8
					4	1.1	2.8					4.7	2.4	2.7
					1	2.4	0.7					0.1	0.4	0.1
					0.8	0.4	2.4					1.2	1.2	0.5
					0.5	0.3	0.2					1	2.6	1.6
					0.7	0.8	0.9					0.5	1.4	1.1
					1.4	1.1						2.6	2.5	1.6
					3.9	0.3						3.6	3.6	1.8
					3.3	5.3						1.1	1.7	1.5
					1.1	0.6						2.4	0.3	0.7
					0.7	1.5						3.3	4.8	3.5
					3	1.8						0.1	0.1	0.4
					0.4	2.5						1.8	0.4	0.2
					0.3	3.8						1.1	1.2	1.8
					1.3	0.4						1.7	2.6	2.1
					1.8	0.6						1.9	1.6	2
					3.1	0						2.6	2.8	2.1
					0.2	1.6						3.5	2	1
					0.2	0.7						1.9	2.2	2.6
					0	0.4						2.1	4.6	2.9
					1.5	0.9						0.7	1.3	1.3
					0.2	0.3						0.7	1.1	1.2
					0.2	1.7						0.8	0.8	1.5
					0.2	2.4						2.1	1.6	1.6
					1.5	0.3						0.2	0.5	0.3
					0.7	1.3						0.2	0.3	0.5
					2.2	0.9						0.9	0.5	0.3
					0.3	1.8						0.5	1.5	1.4
					1.4	1.4						1.6	2	2.8
					1.8	2.1						4.9	5.3	4.4
					3.2	0.9						1.6	0.2	0.4
					0.8	0.5						0.6	0.8	0.8
					1.8	2.2						0.8	0.8	1
					0.8	1.6						1.6	1.7	1.5
					0.2	0.9						0.4	1.4	1
					1.7	1.6						1.5	1.6	2.1
					0.2	1.7						3.7	3.5	1.8
					1.2	1.4						2.7	2.5	2.3
					1.5	0.8						3.5	3.9	3.4
					0.7	0.2						3.1	2.3	2.2
					1.1	1.6						1.5	2.3	2.5
					0.3	2						1.6	1.4	1.1
					0.1	0.4						0.5	1.2	1.6
					1	1.8						2.1	3	3.1
					1.2	2.1						0.3	0.4	0.4
					0.3	0.1						8.5	1.6	0.2
					0.5	4.6						0.5	1.2	1.8
					1.9	0.8						1.2	2.3	1.9
					0	1.2						3.2	4.1	3
					3.9	1						1.3	1.8	0.1
					0.9	1						1.8	2.8	2.5
					0.5	2.7						3.2	2.2	3.3
					1.7	0.3						0.8	2.1	2
					0.8	3.4						2.4	2.7	1.2
					2.5	1						0.2	0.3	0.4
					4.5	1.4						2.1	0.9	0.5
					2.7							4.3	3.4	0.9
					0.9							0.2	0.5	1
					2.5							2.3	3.1	3
												0.9	2.5	2.7
												1	2	2.4
												1.4	1.9	2.8
												0.3	0.2	0.1
												0.9	1.3	1.3
												0.3	0.8	0.5
												4.2	3.8	3.7
												1.8	1.6	2.8
												1.6	1.9	1.4
												4.6	5.3	3.8
												1.8	2.6	2.7
												2	2.4	2.5
												4.3	1.3	1.9
												3.9	3	1.4
												2.3	3.3	3.8
												1.3	0.8	2.4
												1.3	2.1	2.6
												2.6	2.6	2
												2.5	3.3	3.5
												2.8	2.9	3.2
												2.6	4	3.7
												3.6	3.7	4.3
												1	0.7	2.3
												2.7	3.6	0.5
												4.5	4.7	2.9
												2.8	2.7	2.4

## Sheet: ED6i
	Area under the curve
	Pre			Saline			CNO
	M1	M2	M3	M1	M2	M3	M1	M2	M3
1	102.545	109.925	389.787	96.6551	67.397	217.277	207.038	465.354	986.461
2	155.714	176.57	355.103	137.841	166.763	212.899	105.442	380.896	203.908
3	172.64	223.514	187.467	129.044	94.812	210.203	118.249	374.234	808.408
4	150.864	80.2549	209.764	65.0509	392.727	270.317	118.249	265.196	191.159
5	118.048	24.9263	123.22	159.339	77.2199	112.813	155.658	220.112	241.682
6	84.0782	39.994	204.744	159.339	87.2245	131.51	154.436	245.025	236.961
7	159.696	105.87	75.847	124.152	82.7915	246.149	427.829	218.299	375.362
8	41.1291	162.706	85.2053	153.829	163.372	239.269	109.485	305.298	504.229
9	193.767	330.024	113.627	165.121	74.6926	157.084	982.612	311.349	524.891
10	183.578	75.3164	92.9164	120.45	155.69	184.462	828.913	376.722	316.927
Average per mouse	136.206	132.91	183.768	131.082	136.269	198.198	320.791	316.248	438.999

## Sheet: ED6j
	Microglia Process Velocity							Microglia Intensity on Synaptic Boutons
	Saline with DREADD virus			CNO with control virus				Saline with DREADD virus			CNO with control virus
	M23	M24	M25	M29	M30	M31		M23	M24	M25	M29	M30	M31
	0.591459	0.501022	0.738072	0.550065	0.548573	0.667605		1.28002	0.807	1.08886	1.03086	0.803879	1.27539
	0.649162	0.545525	0.561323	0.683661	0.680925	0.585091		1.0415	0.686808	1.01157	1.20332	0.961979	0.930508
	0.551565	0.706345	0.55937	0.593403	0.548378	0.550684		0.587772	0.893621	1.09595	1.09873	0.915699	0.853547
								1.85255	1.0187	1.2297	1.13826	1.29552	1.07704
								1.21705	0.964448	1.03275	1.07157	0.9444	1.41359
								1.00546	1.09282	0.637791	1.00181	1.04784	1.11821
								1.06403	0.998716	1.48196	0.855895	1.03701	1.12405
								1.14899	1.02574	0.751899	0.968017	0.842155	0.903185
								1.25885	1.39651	1.1826	0.90795	0.99906	1.06106
								1.29909	1.34928	1.04769	0.59417	0.844299	0.764775
								0.753287	1.19315	0.683059	0.726037	0.906333	0.940983
								1.24209	1.38382	1.15941	0.911244	0.9988	0.952959
								0.982433	1.56827	0.970697	0.943086	1.0152	1.33802
								1.02238	1.32272	0.843736	0.656048	1.0344	0.90981
								0.919069	1.16787	0.98433	1.28472	1.03959	1.0416
								0.722052	0.802807	1.01009	0.41013	1.15927	1.20502
								1.29637	0.87396		1.08053	1.07774	0.826539
								1.48606	0.807887		1.13621	0.906638	1.12366
									1.14005		1.08411	1.06899	0.900128
									0.962613		1.055	1.0688	1.01058
									1.05457		0.997105	1.11018	1.2955
									1.08902		1.01397		1.22499
									0.84587				1.11251
Average per mouse	0.597395	0.584297	0.619588	0.609043	0.592625	0.601127		1.12106	1.06288	1.01326	0.962217	1.0037	1.06103
